# Supplementary material
Source: publisher figshare collection journal article supplement (https://acs.figshare.com/ndownloader/files/4386196)

## Supporting Information

### Dienyl Homoallyl Alcohols via Palladium Catalyzed Ene-Type Reaction of Aldehydes with 1,3-Dienes

Masahiro Fukushima, Daiki Takushima, and Masanari Kimura\*

*Department of Applied Chemistry, Faculty of Engineering, Nagasaki*

*University, Bunkyo-machi, Nagasaki 852-8521, Japan*

E-mail: masanari@nagasaki-u.ac.jp

#### Experimental Section

Reactions employed oven-dried glassware unless otherwise noted. Thin layer chromatography (TLC) employed glass 0.25 mm silica gel plates with UV indicator (Merck, Silica gel 60F<sub>254</sub>). Flash chromatography columns were packed with 230-400 mesh silica gel as a slurry in hexane. Gradient flash chromatography was conducted eluting with a continuous gradient from hexane to the indicated solvent. Proton and carbon NMR data were obtained with a JEOL-GX400 with tetramethylsilane as an internal standard. Chemical shift values were given in ppm downfield from the internal standard. Infrared spectra were recorded with a JASCO A-100 FT-IR spectrophotometer. High resolution mass spectra (HRMS) were measured with a JEOL JMS-DX303.

## Solvents and Reagents

Tetrahydrofuran was dried and distilled from benzophenone and sodium immediately prior to use under nitrogen atmosphere. Pd(OAc)<sub>2</sub>, PPh<sub>3</sub>, dppf [1,1'-bis(diphenylphosphino)ferrocene], DPEphos [2,2'-bis(diphenylphosphino)diphenyl Ether], BINAP [2,2'-bis(diphenylphosphino)-1,1'-binaphthyl], Xantphos [4,5-bis(diphenylphosphino)-9,9-dimethylxanthene] (Aldrich), Et<sub>3</sub>B (1.0 M THF solution), *n*-Bu<sub>3</sub>B (1.0 M THF solution), Ph<sub>3</sub>B (0.25 M THF solution), Et<sub>2</sub>Zn (1.0 M hexane solution) (Aldrich) were purchased and used without further purification. Isoprene, 2,3-dimethyl-1,3-butadiene, 2-methyl-1,3-pentadiene, myrcene, and methyl sorbate (Tokyo Kasei Kogyo Co., Ltd) were purchased and distilled prior to use. Benzaldehyde, *p*-methoxybenzaldehyde, *p*-chlororbenzaldehyde, dihydrocinnamaldehyde, isovaleraldehyde, cyclohexanecarbaldehyde (Aldrich) were purchased and distilled prior to use by Kugelrohr apparatus. 2-Hydroxy tetrahydrofuran and 2-hydroxy tetrahydropyran were prepared according to the literature.<sup>1</sup>

**General procedure for the Pd-catalyzed coupling reaction of aldehyde with isoprene** (run 6, Table 1): To a solution of Pd(OAc)<sub>2</sub> (22.4 mg, 0.1 mmol) and Xantphos (57.8 mg, 0.1 mmol) in dry THF (5 mL) were successively added benzaldehyde (106 mg, 1 mmol), isoprene (400 mL, 4 mmol), and triethylborane (2 mmol, 1.0 M THF solution) via syringe under nitrogen atmosphere. The mixture was stirred at ambient temperature for 24 h. The mixture was diluted with 30 mL of EtOAc and washed with 2 N HCl, sat. NaHCO<sub>3</sub>, and then brine. The extract was dried (MgSO<sub>4</sub>) and concentrated in vacuo and the residual oil was subjected to column chromatography over silica gel (hexane/EtOAc = 10/1 v/v) to give **1a** (173 mg, 99%, *R<sub>f</sub>* = 0.47; hexane/ethyl acetate = 4/1 v/v).

**3-Methylene-1-phenylpent-4-en-1-ol (1a)**; IR (neat): 3381 (br), 3030 (m), 2930 (m), 1597 (m), 1495 (w), 1454 (m), 1377 (w), 1194 (w), 1043 (m), 893 (s), 760 (m), 700 (s)  $\text{cm}^{-1}$ ;  $^1\text{H}$  NMR (400 MHz,  $\text{CDCl}_3$ )  $\delta$  2.10 (br s, 1 H), 2.58 (dd,  $J = 14.1, 9.0$  Hz, 1 H), 2.67 (dd,  $J = 14.1, 4.1$  Hz, 1 H), 4.83 (dd,  $J = 9.0, 4.1$  Hz, 1 H), 5.09 (s, 1 H), 5.13 (d,  $J = 10.7$  Hz, 1 H), 5.15 (s, 1 H), 5.32 (d,  $J = 17.6$  Hz, 1 H), 6.41 (dd,  $J = 17.6, 10.7$  Hz, 1 H), 7.23-7.39 (m, 5 H);  $^{13}\text{C}$  NMR (100 MHz,  $\text{CDCl}_3$ )  $\delta$  42.2, 72.2, 114.2, 118.7, 125.7, 127.4, 128.3, 138.2, 142.6, 144.0. High-resolution MS, calcd for  $\text{C}_{12}\text{H}_{14}\text{O}$ : 174.1045. Found  $m/z$  (relative intensity): 174.0988 ( $\text{M}^+$ , 6.9), 188.1178 (100).

**4-Methyl-3-methylene-1-phenylpent-4-en-1-ol (1b)**; IR (neat): 3381 (br), 3082 (w), 3032 (w), 2947 (m), 1805 (w), 1599 (s), 1495 (m), 1452 (s), 1190 (w), 1041 (s), 895 (s), 760 (m), 700 (s)  $\text{cm}^{-1}$ ;  $^1\text{H}$  NMR (400 MHz,  $\text{CDCl}_3$ )  $\delta$  1.95 (s, 3 H), 2.04 (brs, 1 H), 2.58 (dd,  $J = 14.1, 9.5$  Hz, 1 H), 2.79 (dd,  $J = 14.1, 3.8$  Hz, 1 H), 4.82 (dd,  $J = 9.5, 3.8$  Hz, 1 H), 5.07 (s, 2 H), 5.19 (s, 1 H), 5.24 (s, 1 H), 7.25-7.39 (m, 5 H);  $^{13}\text{C}$  NMR (100 MHz,  $\text{CDCl}_3$ )  $\delta$  21.1, 44.6, 72.5, 113.6, 115.4, 125.7, 127.4, 128.3, 142.2, 144.1, 144.3. High-resolution MS, calcd for  $\text{C}_{13}\text{H}_{16}\text{O}$ : 188.1201. Found  $m/z$  (relative intensity): 188.1171 ( $\text{M}^+$ , 100).

**(E)-3-Methylene-1-phenylhex-4-en-1-ol (1c)**; IR (neat): 3395 (br), 3032 (m), 2910 (m), 2876 (m), 1649 (w), 1605 (m), 1493 (w), 1452 (m), 1051 (w), 966 (w), 756 (m), 700 (s)  $\text{cm}^{-1}$ ;  $^1\text{H}$  NMR (400 MHz,  $\text{CDCl}_3$ )  $\delta$  1.80 (d,  $J = 6.7$  Hz, 3 H), 2.07 (d,  $J = 2.4$  Hz, 1 H), 2.51 (dd,  $J = 14.0, 9.4$  Hz, 1 H), 2.69 (dd,  $J = 14.0, 3.6$  Hz, 1 H), 4.82 (ddd,  $J = 9.4, 3.6, 2.4$  Hz, 1 H), 4.95 (s, 1 H), 5.04 (s, 1 H), 5.83 (dq,  $J = 15.7, 6.7$  Hz, 1 H), 6.12 (d,  $J = 15.7$  Hz, 1 H), 7.27-7.39 (m, 5 H);  $^{13}\text{C}$  NMR (100 MHz,  $\text{CDCl}_3$ )  $\delta$  18.4, 43.3, 72.1, 116.0, 125.7, 126.1, 127.4, 128.3, 132.7, 142.5, 144.1. High-resolution MS, calcd for  $\text{C}_{13}\text{H}_{16}\text{O}$ : 188.1201. Found  $m/z$  (relative intensity): 188.1171 ( $\text{M}^+$ , 100).

**7-Methyl-1-phenyl-3-vinylocta-3,6-dien-1-ol (1d)**; (*Z* : *E* = 3 : 1); IR (neat): 3383 (br), 3086 (w), 2970 (m), 2914 (s), 2856 (m), 1636 (w), 1593 (w), 1495 (m), 1452 (s), 1375 (m), 1026 (m), 905 (m), 756 (m), 700 (s)  $\text{cm}^{-1}$ ;  $^1\text{H}$  NMR (400 MHz,  $\text{CDCl}_3$ , *Z* isomer)  $\delta$  1.63 (s, 3 H), 1.69 (d,  $J$  = 1.2 Hz, 3 H), 2.01 (d,  $J$  = 2.2 Hz, 1 H), 2.44 (dd,  $J$  = 13.9, 9.5 Hz, 1 H), 2.71 (dd,  $J$  = 13.9, 3.9 Hz, 1 H), 2.88 (t,  $J$  = 7.2 Hz, 2 H), 4.80 (ddd,  $J$  = 9.5, 3.9, 2.2 Hz, 1 H), 5.07 (tq,  $J$  = 7.2, 1.2 Hz, 1 H), 5.20 (d,  $J$  = 11.0 Hz, 1 H), 5.35 (d,  $J$  = 17.6 Hz, 1 H), 5.43 (t,  $J$  = 7.2 Hz, 1 H), 6.74 (dd,  $J$  = 17.6, 11.0 Hz, 1 H), 7.26-7.38 (m, 5 H);  $^1\text{H}$  NMR (400 MHz,  $\text{CDCl}_3$ , *E* isomer)  $\delta$  1.59 (s, 3 H), 1.68 (d,  $J$  = 1.2 Hz, 3 H), 1.96 (d,  $J$  = 2.4 Hz, 1 H), 2.64 (dd,  $J$  = 13.8, 5.0 Hz, 1 H), 2.77 (dd,  $J$  = 13.8, 8.7 Hz, 1 H), 2.88 (t,  $J$  = 7.2 Hz, 2 H), 4.84 (ddd,  $J$  = 8.2, 5.0, 2.4 Hz, 1 H), 4.99 (tq,  $J$  = 7.2, 1.2 Hz, 1 H), 5.02 (d,  $J$  = 11.0 Hz, 1 H), 5.24 (d,  $J$  = 17.9 Hz, 1 H), 5.52 (t,  $J$  = 7.2 Hz, 1 H), 6.34 (dd,  $J$  = 17.9, 11.0 Hz, 1 H), 7.26-7.38 (m, 5 H);  $^{13}\text{C}$  NMR (100 MHz,  $\text{CDCl}_3$ , *Z* isomer)  $\delta$  17.8, 25.6, 26.7, 44.2, 72.1, 114.3, 121.8, 125.7, 127.2, 128.2, 132.2, 132.3, 132.4, 132.7, 144.1;  $^{13}\text{C}$  NMR (100 MHz,  $\text{CDCl}_3$ , *E* isomer)  $\delta$  17.7, 25.6, 27.5, 44.2, 72.9, 114.3, 121.6, 125.6, 127.3, 128.2, 132.2, 132.3, 132.4, 132.7, 144.2. High-resolution MS, calcd for  $\text{C}_{17}\text{H}_{22}\text{O}$ : 242.1671. Found  $m/z$  (relative intensity): 242.1667 ( $\text{M}^+$ , 37.4), 226.1681 (100).

**(2*E*,4*E*)-Methyl 2-[hydroxyl(phenyl)methyl]hexa-2,4-dienoate (1e)**; IR (neat): 3487 (br), 3061 (w), 3032 (w), 2997 (m), 2961 (m), 2918 (m), 1695 (s), 1637 (s), 1602 (m), 1493 (m), 1435 (s), 1304 (m), 1236 (s), 1018 (m), 976 (s)  $\text{cm}^{-1}$ ;  $^1\text{H}$  NMR (400 MHz,  $\text{CDCl}_3$ )  $\delta$  1.91 (dd,  $J$  = 7.0, 1.5 Hz, 3 H), 3.69 (s, 3 H), 4.11 (d,  $J$  = 8.7 Hz, 1 H), 5.81 (d,  $J$  = 8.7 Hz, 1 H), 6.27 (dq,  $J$  = 14.6, 7.0 Hz, 1 H), 6.57 (ddq,  $J$  = 14.6, 11.6, 1.5 Hz, 1 H), 7.21-7.37 (m, 6 H);  $^1\text{H}$  NMR (400 MHz,  $\text{C}_6\text{D}_6$ )  $\delta$  1.37 (dd,  $J$  = 6.8, 1.7 Hz, 3 H), 3.19 (s, 3 H), 4.22 (d,  $J$  = 10.5 Hz, 1 H), 5.71 (dq,  $J$  = 14.8, 6.8 Hz, 1 H), 5.95 (d,  $J$  = 10.5 Hz, 1 H), 6.35 (ddq,  $J$  = 14.8, 11.5, 1.7 Hz, 1 H), 7.05 (t,  $J$  = 7.4 Hz, 2 H), 7.18 (d,  $J$  = 7.4 Hz, 1 H), 7.34 (d,  $J$  = 11.5 Hz, 1 H), 7.56 (d,  $J$  = 7.4 Hz, 2 H);  $^{13}\text{C}$  NMR (100 MHz,  $\text{CDCl}_3$ )  $\delta$  19.0, 51.7, 69.7, 125.2, 126.0, 126.9,

128.1, 128.4, 140.8, 141.6, 142.8, 167.9. High-resolution MS, calcd for C<sub>14</sub>H<sub>16</sub>O: 232.1099.

Found *m/z* (relative intensity): 232.1084 (M<sup>+</sup>, 100).

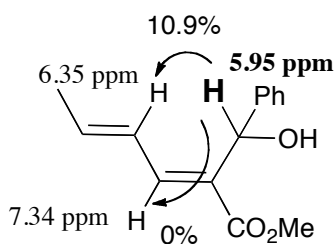

NOE Increment of irradiation at the bold face proton of compound **1e** (C<sub>6</sub>D<sub>6</sub>).

**1-(4-Methoxyphenyl)-3-methylenepent-4-en-1-ol (1f)**; IR (neat): 3406 (br), 3086 (w), 2912 (m), 2835 (m), 1612 (m), 1593 (m), 1514 (s), 1248 (s), 1175 (m), 1036 (m), 901 (m), 831 (m) cm<sup>-1</sup>; <sup>1</sup>H NMR (400 MHz, CDCl<sub>3</sub>) δ 1.98 (d, *J* = 2.1 Hz, 1 H), 2.57 (dd, *J* = 14.1, 9.0 Hz, 1 H), 2.67 (dd, *J* = 14.1, 4.3 Hz, 1 H), 3.80 (s, 3 H), 4.80 (ddd, *J* = 9.0, 4.3, 2.1 Hz, 1 H), 5.08 (s, 1 H), 5.13 (d, *J* = 10.7 Hz, 1 H), 5.16 (s, 1 H), 5.32 (d, *J* = 17.6 Hz, 1 H), 6.40 (dd, *J* = 17.6, 10.7 Hz, 1 H), 6.88 (d, *J* = 8.5 Hz, 2 H), 7.30 (d, *J* = 8.5 Hz, 2 H); <sup>13</sup>C NMR (100 MHz, CDCl<sub>3</sub>) δ 41.5, 54.7, 71.2, 113.1, 113.5, 118.0, 126.3, 135.6, 137.7, 142.1, 158.4. High-resolution MS, calcd for C<sub>13</sub>H<sub>16</sub>O<sub>2</sub>: 204.1150. Found *m/z* (relative intensity): 204.1150 (M<sup>+</sup>, 83.1), 137.0560 (100).

**1-(4-Chlorophenyl)-3-methylenepent-4-en-1-ol (1g)**; IR (neat): 3369 (br), 3086 (w), 2931 (m), 2330 (w), 1595 (m), 1491 (s), 1090 (s), 1015 (s), 903 (s), 829 (m) cm<sup>-1</sup>; <sup>1</sup>H NMR (400 MHz, CDCl<sub>3</sub>) δ 2.06 (br s, 1 H), 2.53 (dd, *J* = 14.1, 9.0 Hz, 1 H), 2.67 (dd, *J* = 14.1, 4.1 Hz, 1 H), 4.82 (dd, *J* = 9.0, 4.1 Hz, 1 H), 5.07 (s, 1 H), 5.15 (d, *J* = 10.8 Hz, 1 H), 5.17 (s, 1 H), 5.30 (d, *J* = 17.6 Hz, 1 H), 6.41 (dd, *J* = 17.6, 10.8 Hz, 1 H), 7.25-7.33 (m, 5 H); <sup>13</sup>C NMR (100 MHz, CDCl<sub>3</sub>) δ 42.3, 71.5, 114.3, 118.9, 127.0, 128.4, 133.1, 138.0, 142.2, 142.3. High-resolution MS, calcd for C<sub>12</sub>H<sub>13</sub>ClO: 208.0655. Found *m/z* (relative intensity):

208.0626 ( $M^+$ , 40.6), 193.0404 (100).

**5-Methylene-1-phenylhept-6-en-3-ol (1h)**; IR (neat): 3312 (br), 3050 (w), 3010 (w), 2922 (s), 2851 (m), 1620 (w), 1595 (m), 1508 (s), 1456 (m), 1246 (m), 1037 (m), 897 (m), 698 (m)  $\text{cm}^{-1}$ ;  $^1\text{H}$  NMR (400 MHz,  $\text{CDCl}_3$ )  $\delta$  1.83 (m, 2 H), 2.28 (dd,  $J = 13.8, 9.0$  Hz, 1 H), 2.53 (dd,  $J = 13.8, 3.8$  Hz, 1 H), 2.70 (ddd,  $J = 13.8, 7.8, 8.6$  Hz, 1 H), 2.84 (ddd,  $J = 13.8, 7.8, 8.6$  Hz, 1 H), 3.79 (m,  $J = 9.0, 3.8$  Hz, 1 H), 5.08 (s, 1 H), 5.09 (d,  $J = 10.8$  Hz, 1 H), 5.16 (s, 1 H), 5.21 (d,  $J = 17.6$  Hz, 1 H), 6.37 (dd,  $J = 17.6, 10.8$  Hz, 1 H), 7.16-7.29 (m, 5 H);  $^{13}\text{C}$  NMR (100 MHz,  $\text{CDCl}_3$ )  $\delta$  32.1, 38.8, 40.1, 69.0, 114.2, 118.3, 125.7, 128.3, 138.3, 141.9, 142.9. High-resolution MS, calcd for  $\text{C}_{14}\text{H}_{18}\text{O}$ : 202.1358. Found  $m/z$  (relative intensity): 202.1334 ( $M^+$ , 9.9), 184.1227 (100).

**2-Methyl-6-methylenooct-7-en-4-ol (1i)**; IR (neat): 3358 (br), 3088 (w), 2957 (s), 2931 (s), 2870 (m), 1595 (m), 1468 (m), 1367 (m), 1261 (m), 1022 (m), 991 (m), 897 (s)  $\text{cm}^{-1}$ ;  $^1\text{H}$  NMR (400 MHz,  $\text{CDCl}_3$ )  $\delta$  0.92 (d,  $J = 6.8$  Hz, 3 H), 0.94 (d,  $J = 6.3$  Hz, 3 H), 1.28 (ddd,  $J = 13.8, 8.6, 4.3$  Hz, 1 H), 1.46 (ddd,  $J = 13.8, 8.7, 5.4$  Hz, 1 H), 1.82 (qqdd,  $J = 6.8, 6.3, 5.4, 4.3$  Hz, 1 H), 2.21 (dd,  $J = 13.9, 8.9$  Hz, 1 H), 2.48 (dd,  $J = 13.9, 3.9$  Hz, 1 H), 3.82 (dddd,  $J = 8.9, 8.7, 8.6, 3.9$  Hz, 1 H), 5.09 (s, 1 H), 5.11 (d,  $J = 10.7$  Hz, 1 H), 5.15 (s, 1 H), 5.25 (d,  $J = 17.6$  Hz, 1 H), 6.39 (dd,  $J = 17.6, 10.7$  Hz, 1 H);  $^{13}\text{C}$  NMR (100 MHz,  $\text{CDCl}_3$ )  $\delta$  22.2, 23.5, 24.8, 40.7, 46.6, 67.7, 114.1, 118.2, 138.5, 143.2. High-resolution MS, calcd for  $\text{C}_{10}\text{H}_{18}\text{O}$ : 154.1358. Found  $m/z$  (relative intensity): 154.1325 ( $M^+$ , 24.5), 135.1141 (100).

**1-Cyclohexyl-3-methylenepent-4-en-1-ol (1j)**; IR (neat): 3414 (br), 3086 (w), 2926 (s), 2852 (s), 1593 (m), 1450 (m), 1394 (w), 1261 (w), 1086 (w), 991 (m), 895 (m)  $\text{cm}^{-1}$ ;  $^1\text{H}$ -NMR (400 MHz,  $\text{CDCl}_3$ )  $\delta$  1.06-1.80 (m, 11 H), 1.90 (br s, 1 H), 2.14 (dd,  $J = 13.9, 10.0$  Hz, 1 H), 2.59 (dd,  $J = 13.9, 2.7$  Hz, 1 H), 3.50 (ddd,  $J = 10.0, 5.7, 2.7$  Hz, 1 H), 5.08 (s, 1 H), 5.09 (d,  $J =$

10.3 Hz, 1 H), 5.15 (s, 1 H), 5.23 (d,  $J = 17.6$ , 1 H), 6.38 (dd,  $J = 17.6$ , 10.3 Hz, 1 H);  $^{13}\text{C}$ -NMR (100 MHz,  $\text{CDCl}_3$ )  $\delta$  26.7, 28.3, 29.2, 36.9, 43.6, 73.4, 114.1, 118.2, 138.4, 143.6. High-resolution MS, calcd for  $\text{C}_{12}\text{H}_{20}\text{O}$ : 180.1514. Found  $m/z$  (relative intensity): 180.1506 ( $\text{M}^+$ , 29.5), 162.1354 (100).

**6-Methyleneoct-7-ene-1,4-diol (1k)**; IR (neat): 3306 (br), 3086 (w), 2935 (s), 2872 (m), 2359 (w), 1703 (w), 1595 (s), 1435 (s), 1404 (s), 1227 (s), 999 (m), 899 (s), 748 (s)  $\text{cm}^{-1}$ ;  $^1\text{H}$  NMR (400 MHz,  $\text{CDCl}_3$ )  $\delta$  1.67-1.83 (m, 4 H), 2.17 (s, 2 H), 2.29 (dd,  $J = 13.9$ , 9.0 Hz, 1 H), 2.50 (dd,  $J = 13.9$ , 3.8 Hz, 1 H), 3.68 (m, 2 H), 3.80 (ddm,  $J = 9.0$ , 3.8 Hz, 1 H), 5.10 (s, 1 H), 5.12 (d,  $J = 11.1$  Hz, 1 H), 5.17 (s, 1 H), 5.26 (d,  $J = 17.6$  Hz, 1 H), 6.39 (dd,  $J = 17.6$ , 11.1 Hz, 1 H);  $^{13}\text{C}$  NMR (100 MHz,  $\text{CDCl}_3$ )  $\delta$  29.3, 34.1, 40.2, 62.9, 69.6, 114.2, 118.3, 138.3, 142.9. High-resolution MS, calcd for  $\text{C}_9\text{H}_{16}\text{O}_2$ : 156.1150. Found  $m/z$  (relative intensity): 156.1146 ( $\text{M}^+$ , 87.9), 138.1017 (100).

**7-Methylenenon-8-ene-1,5-diol (1l)**; IR (neat): 3331 (br), 3088 (w), 2937 (s), 2864 (m), 1595 (m), 1437 (m), 1404 (m), 1072 (m), 1028 (m), 899 (s)  $\text{cm}^{-1}$ ;  $^1\text{H}$  NMR (400 MHz,  $\text{CDCl}_3$ )  $\delta$  1.49-1.63 (m, 6 H), 2.23 (dd,  $J = 13.9$ , 8.9 Hz, 1 H), 2.51 (dd,  $J = 13.9$ , 3.8 Hz, 1 H), 3.66 (t,  $J = 6.2$  Hz, 2 H), 3.75 (m, 1 H), 5.09 (s, 1 H), 5.11 (d,  $J = 10.9$  Hz, 1 H), 5.15 (s, 1 H), 5.24 (d,  $J = 17.6$  Hz, 1 H), 6.38 (dd,  $J = 17.6$ , 10.9 Hz, 1 H);  $^{13}\text{C}$  NMR (100 MHz,  $\text{CDCl}_3$ )  $\delta$  22.0, 32.7, 36.8, 40.2, 62.9, 69.5, 114.2, 118.3, 138.4, 143.1. High-resolution MS, calcd for  $\text{C}_{10}\text{H}_{18}\text{O}_2$ : 170.1307. Found  $m/z$  (relative intensity): 170.1304 ( $\text{M}^+$ , 94.6), 137.0912 (100).

## Reference

1) S. Kodato, M. Nakagawa, K. Nakayama, T. Hino, *Tetrahedron*, **1989**, 45, 7247.

benzaldehyde, 1H

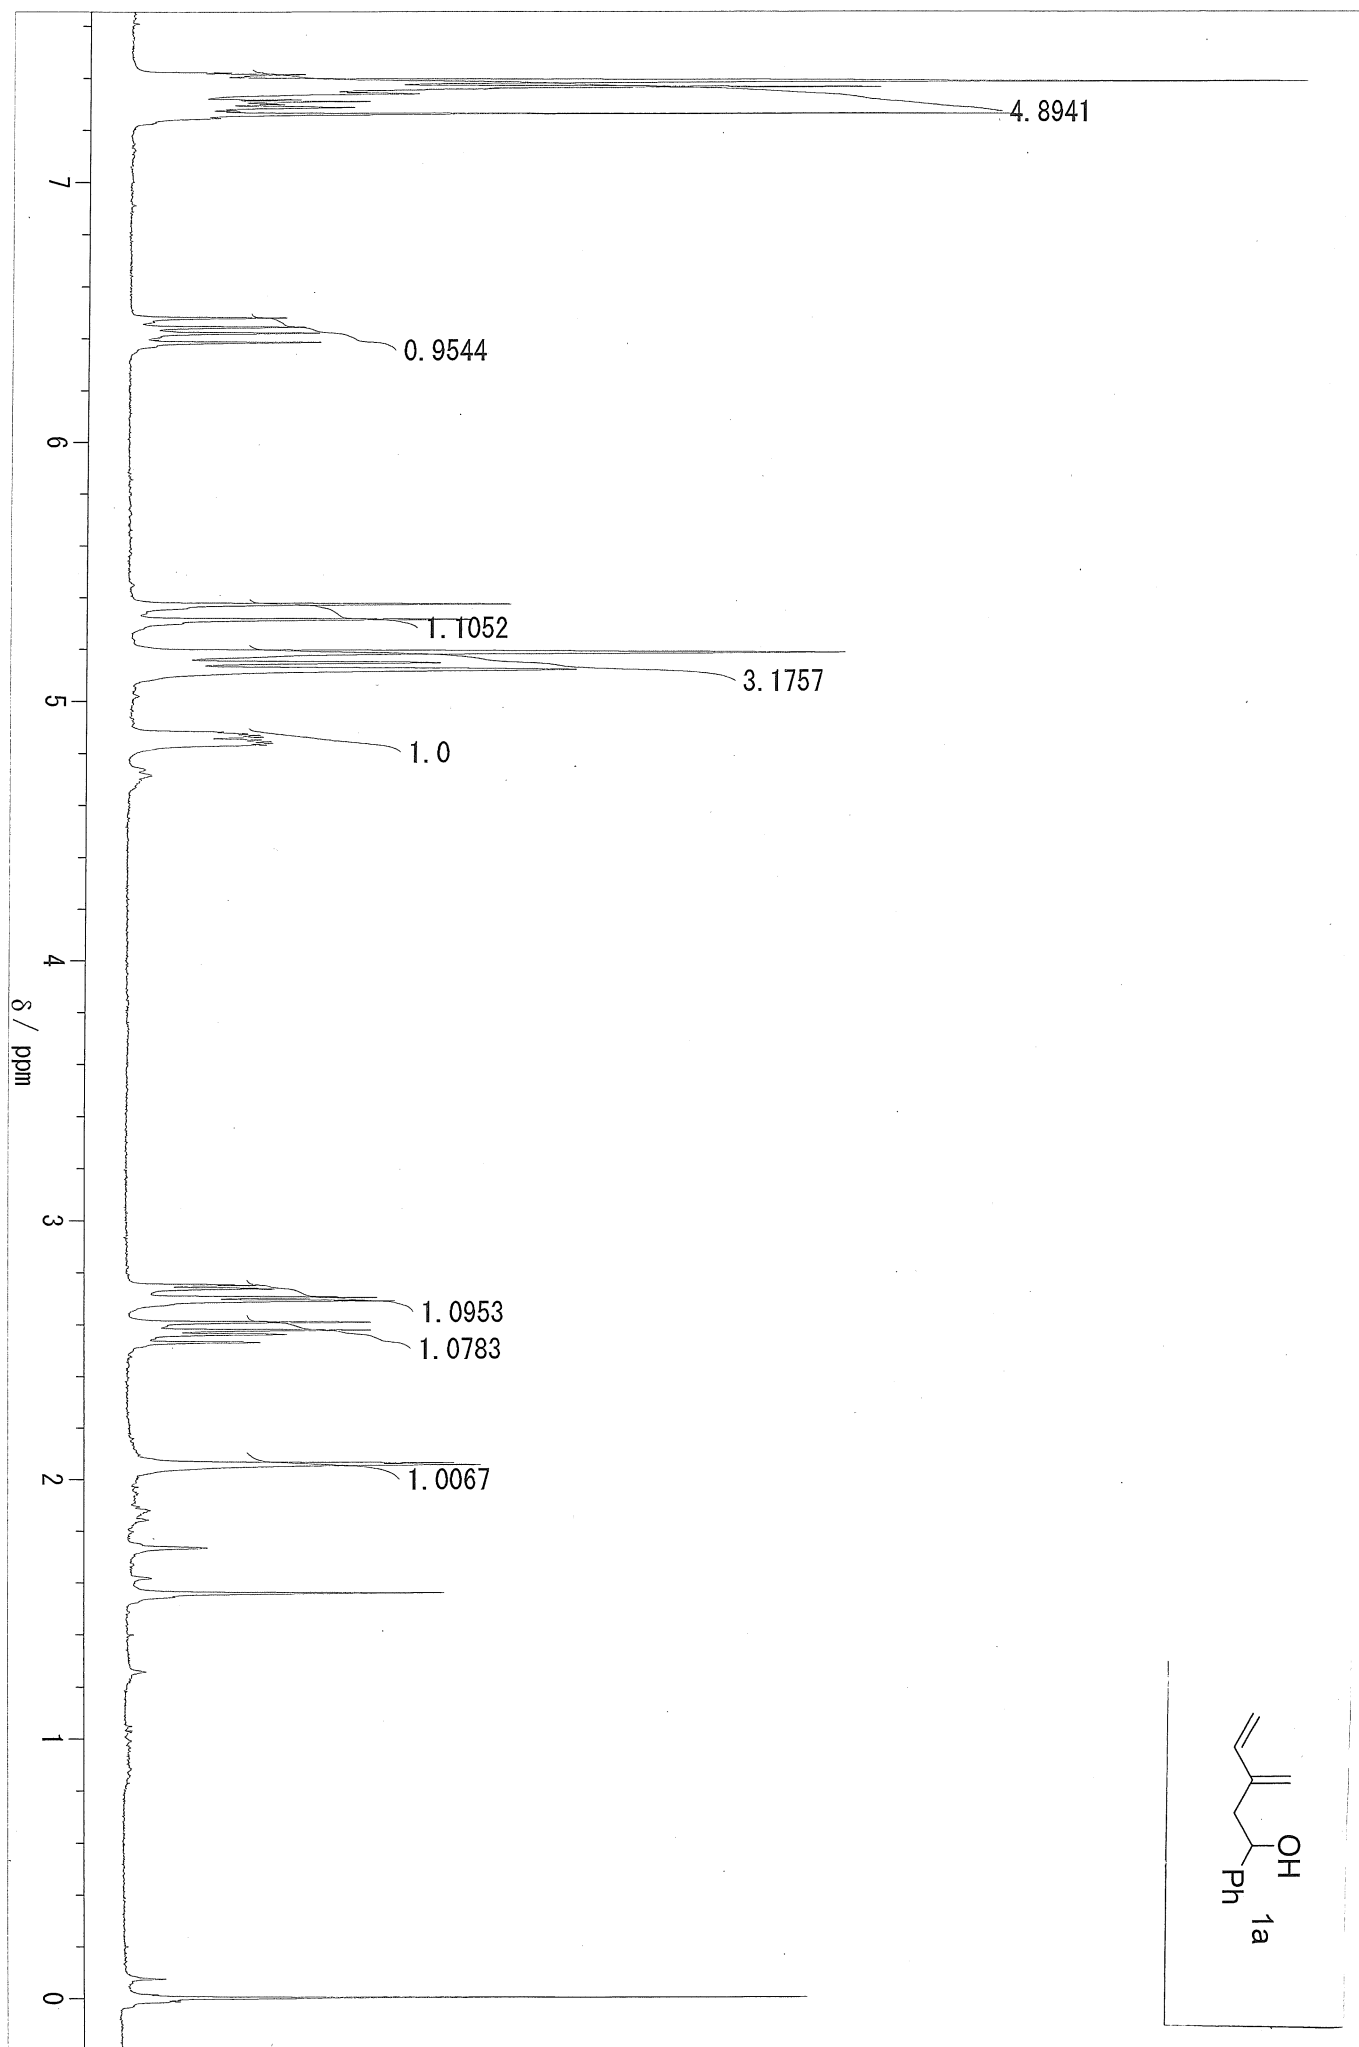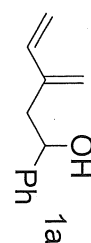



benzaldehyde, 13C

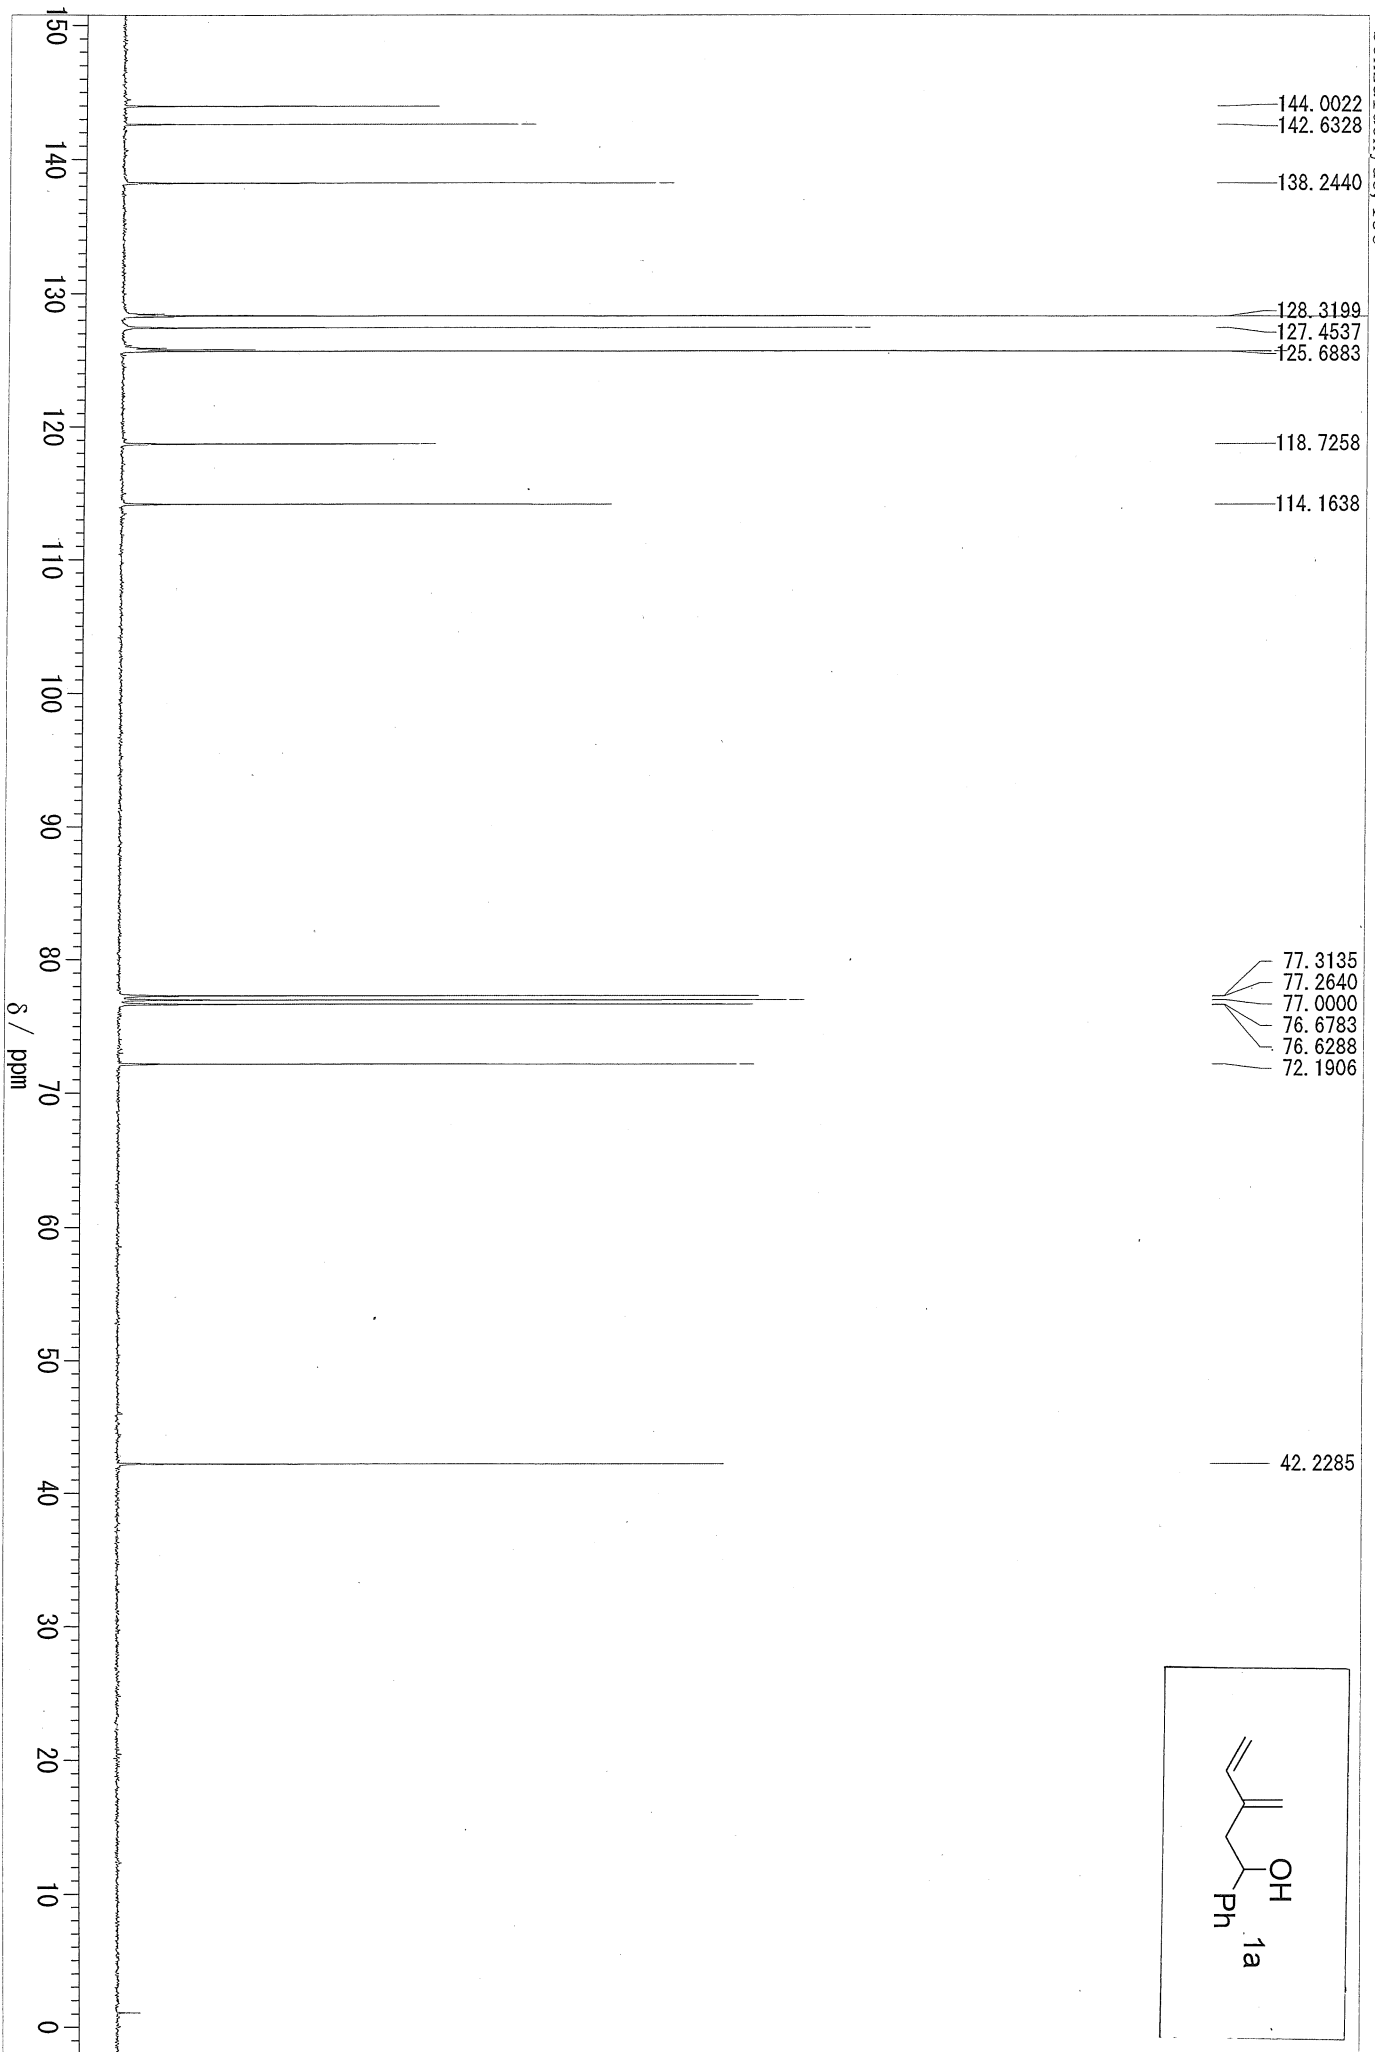

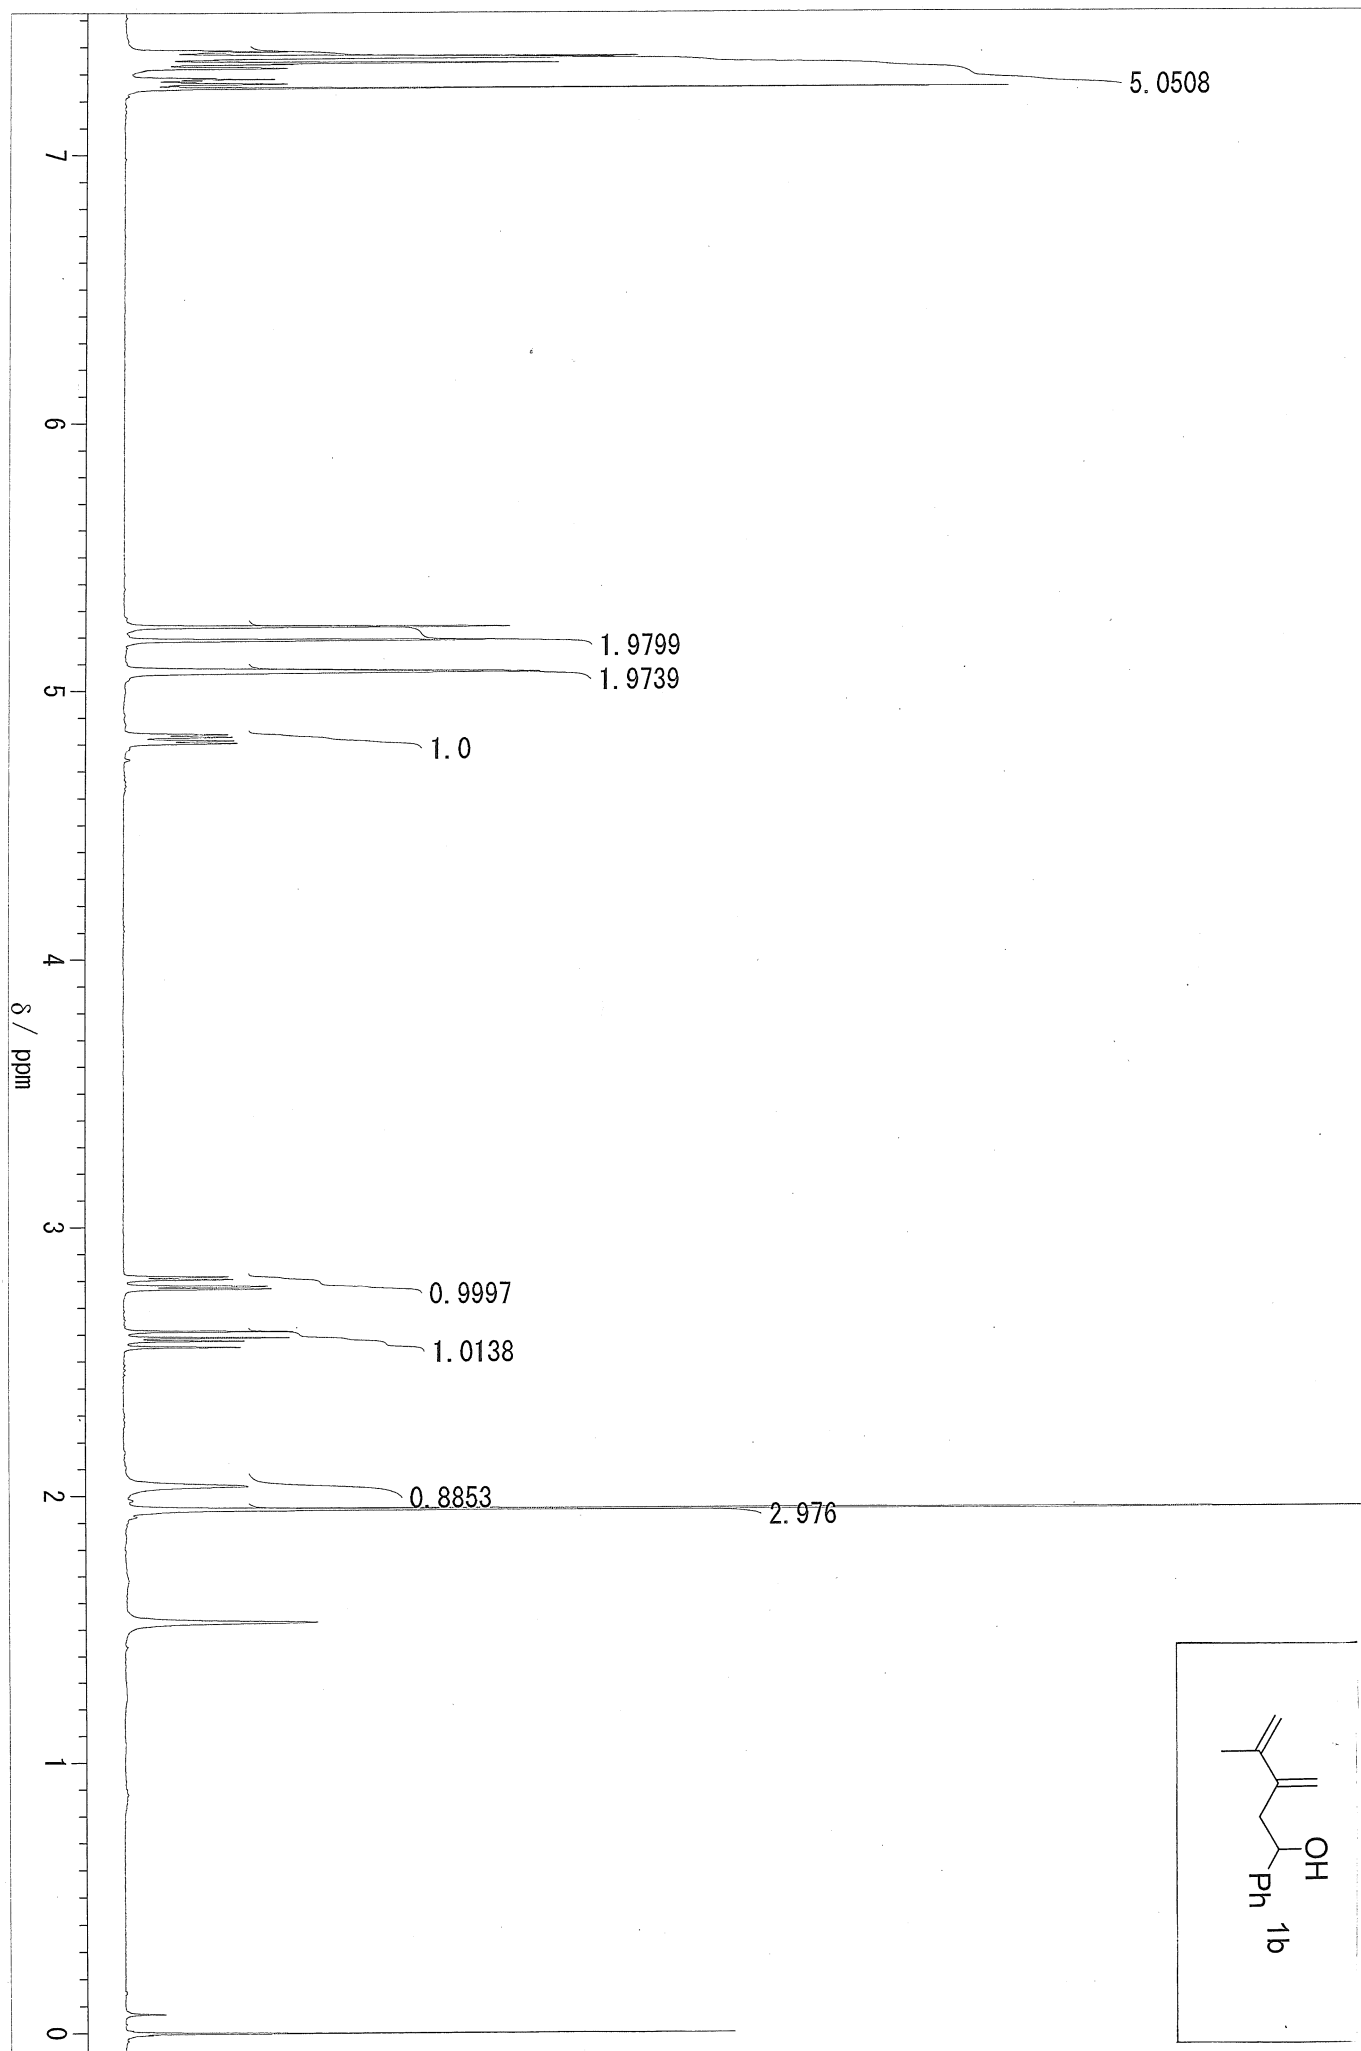

2,3-dimethyl-1,3-butadiene, 13C

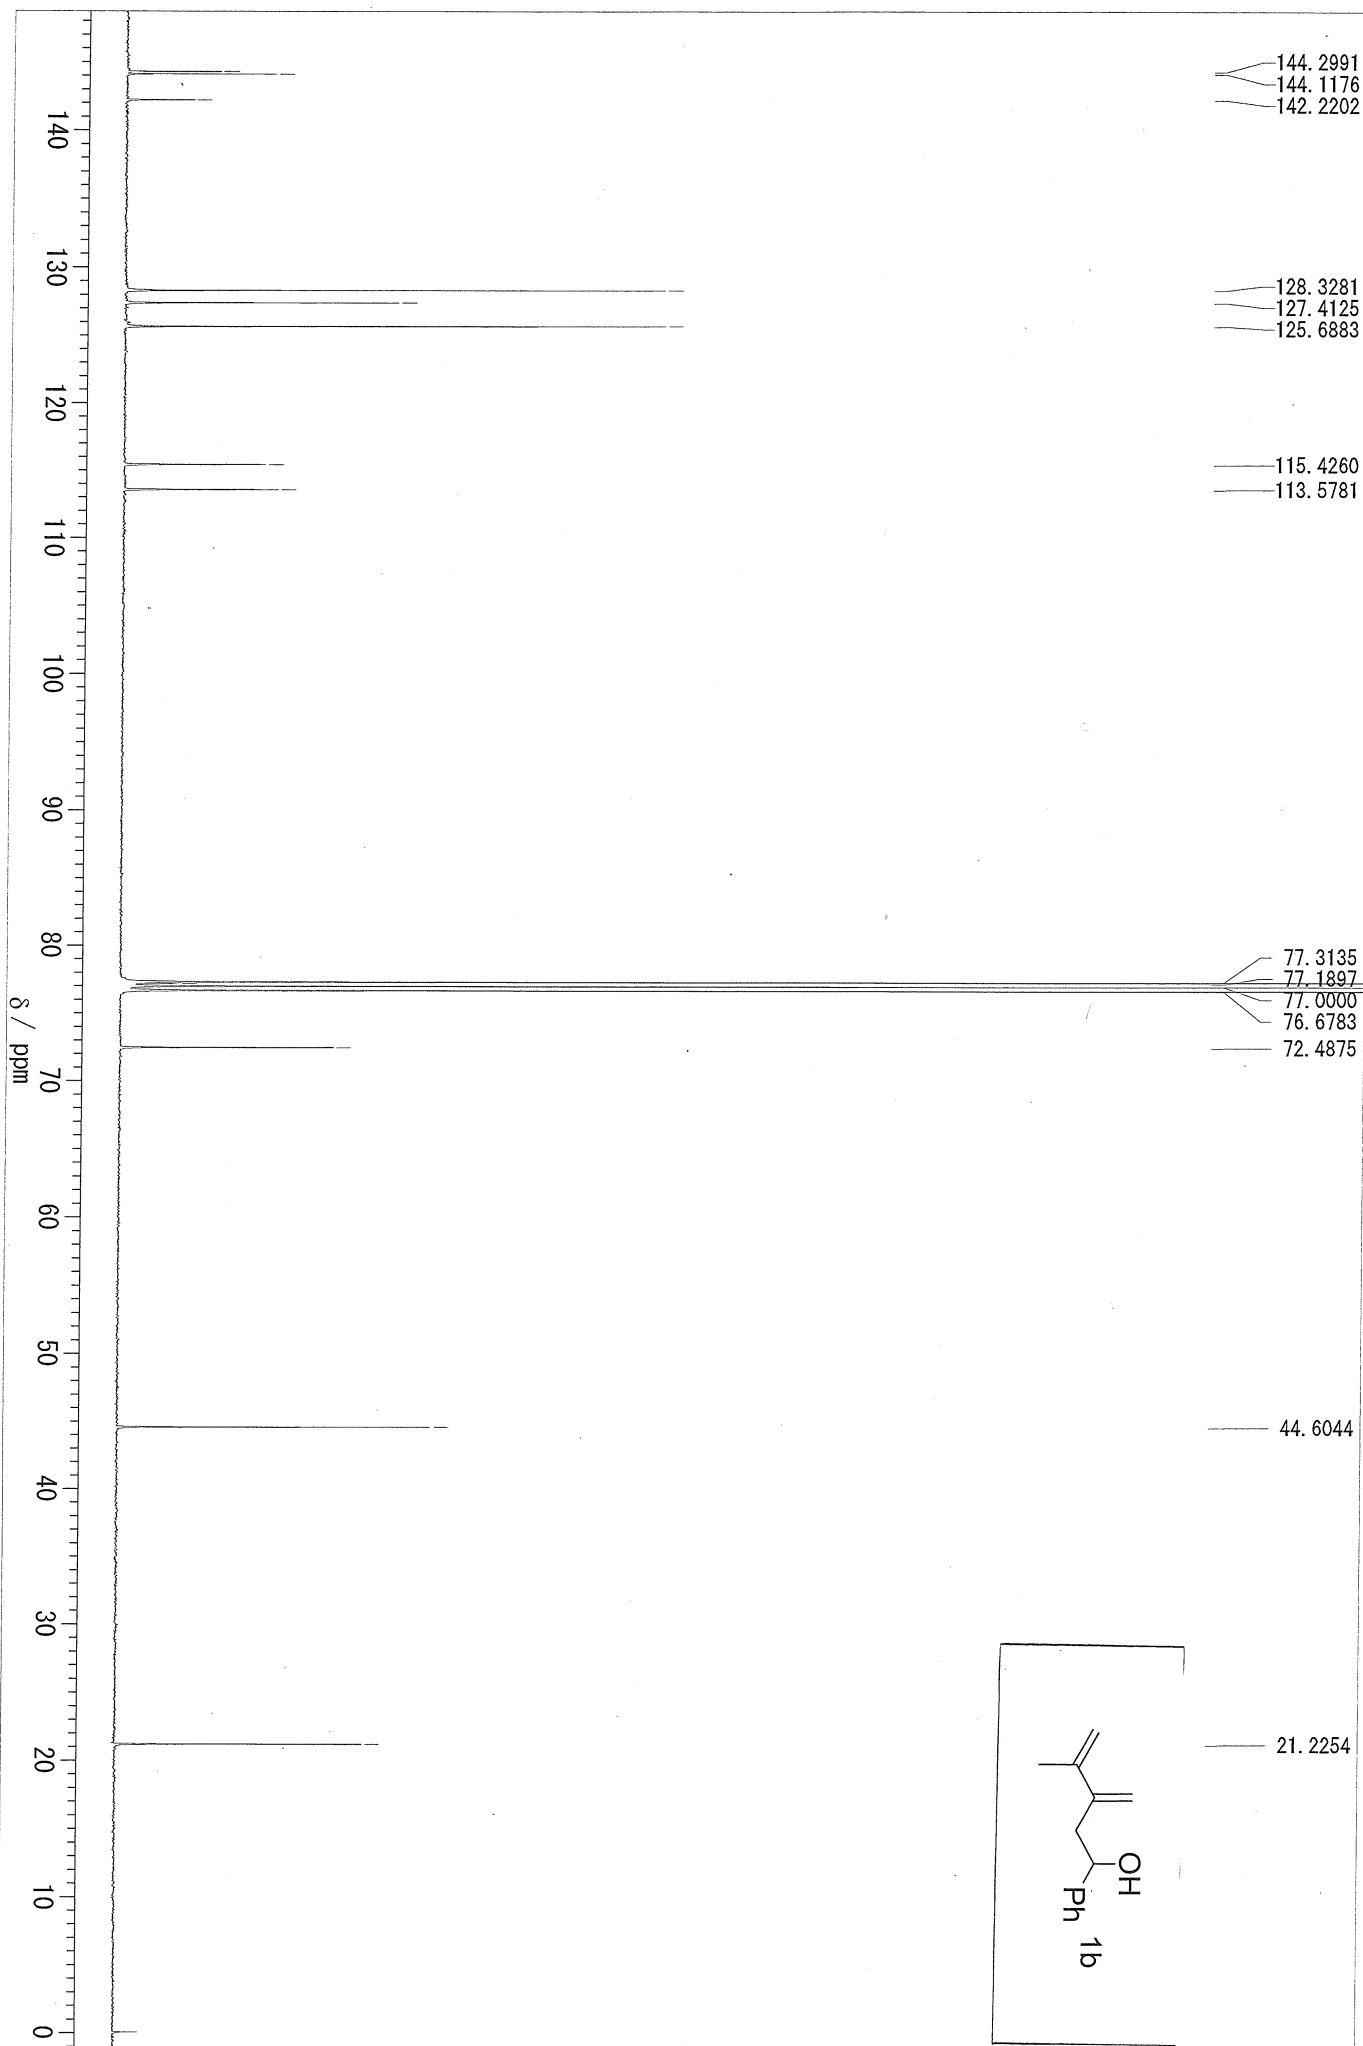

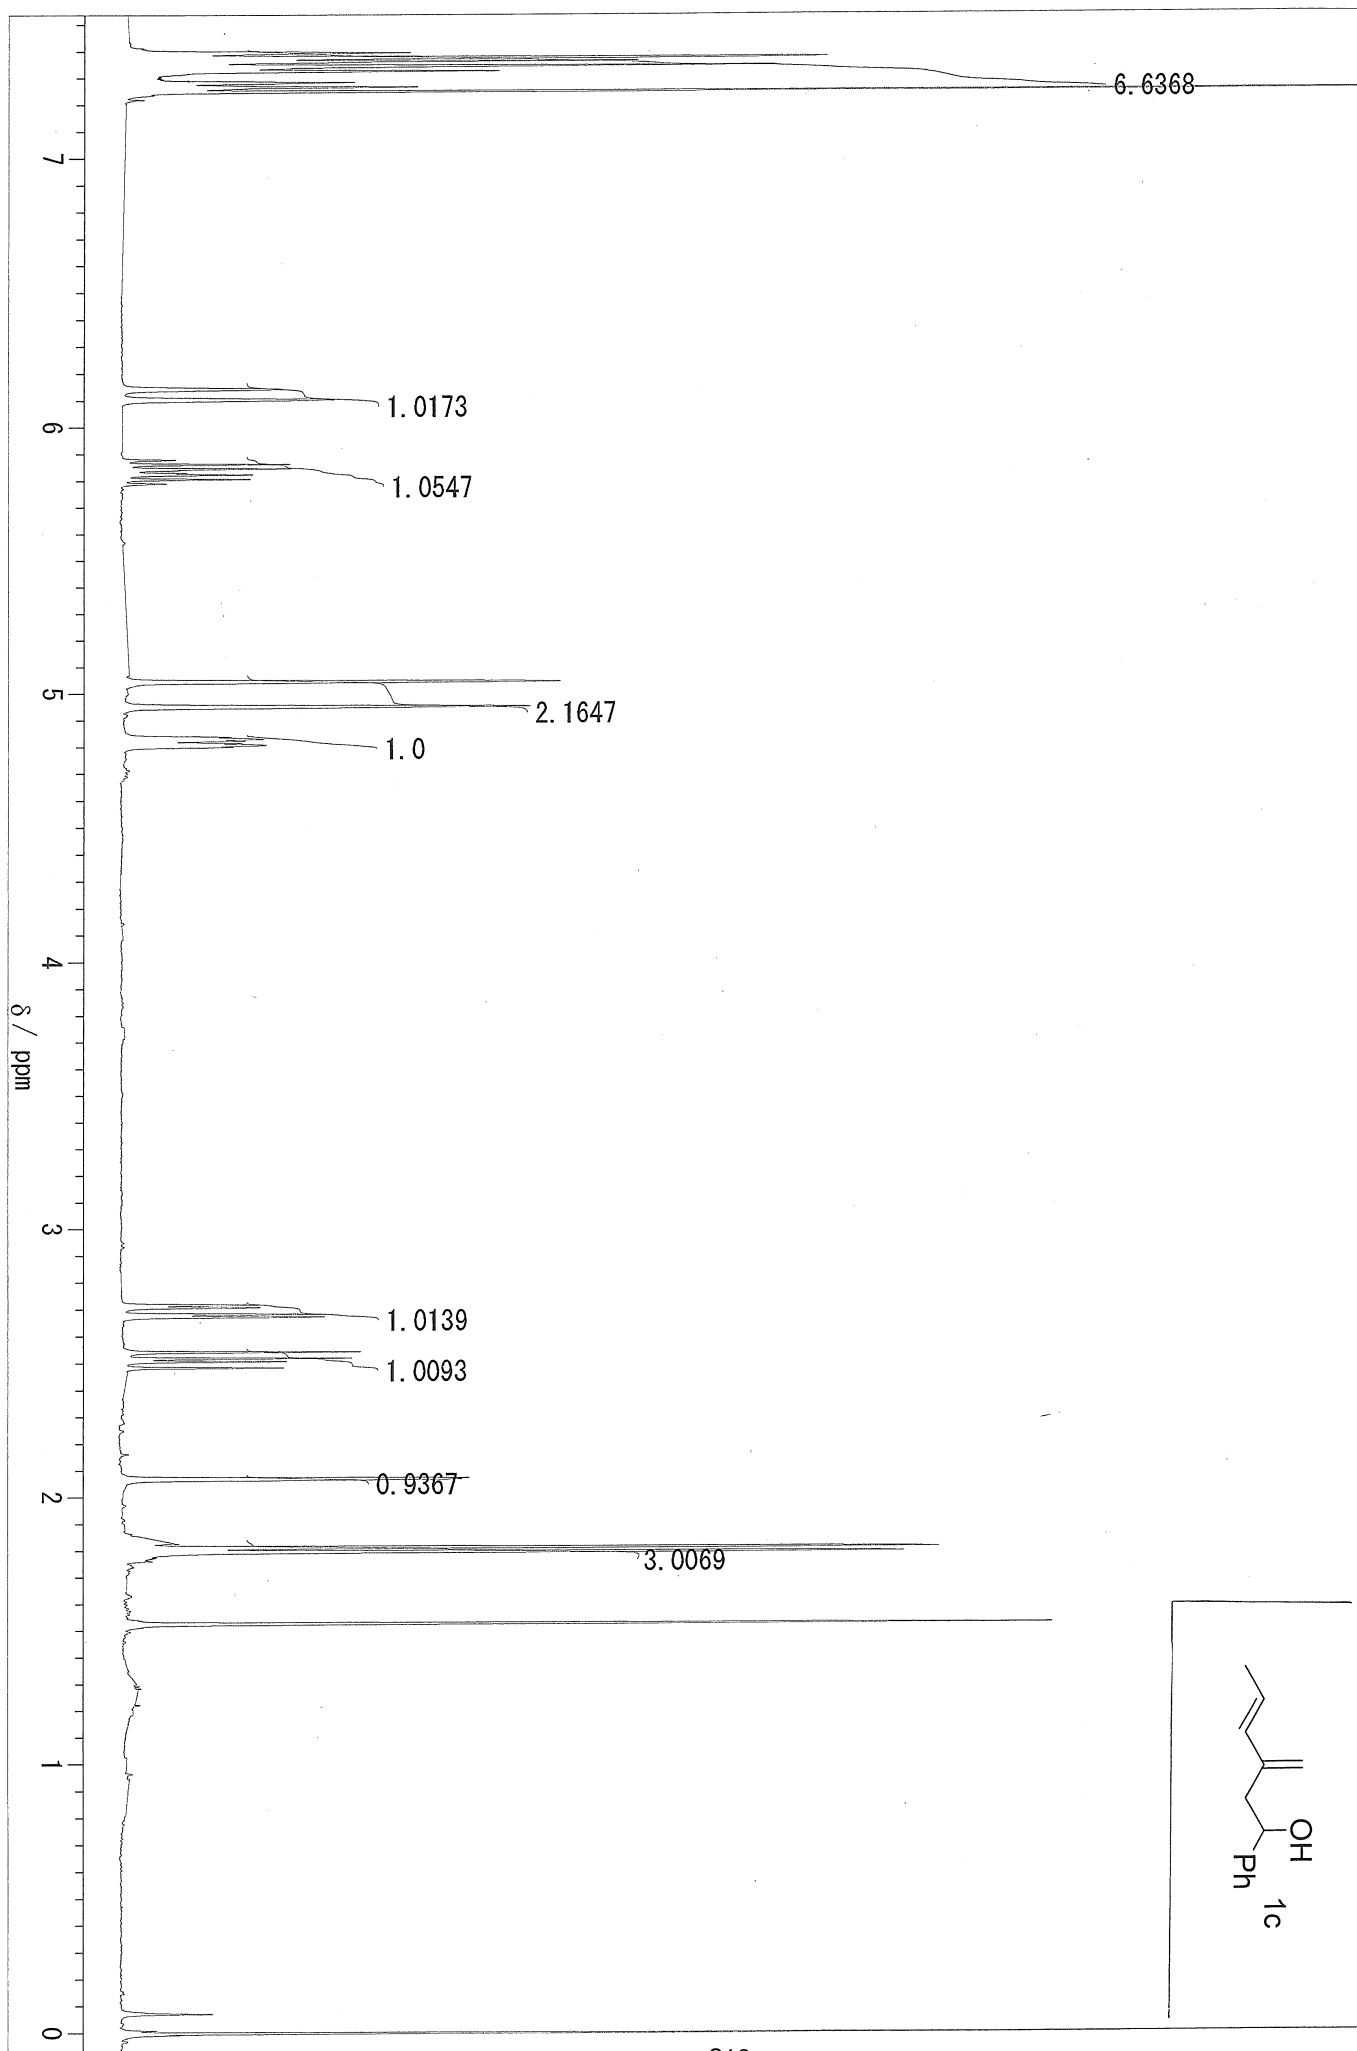

1,3-dimethyl-1,3-butadiene, 13C

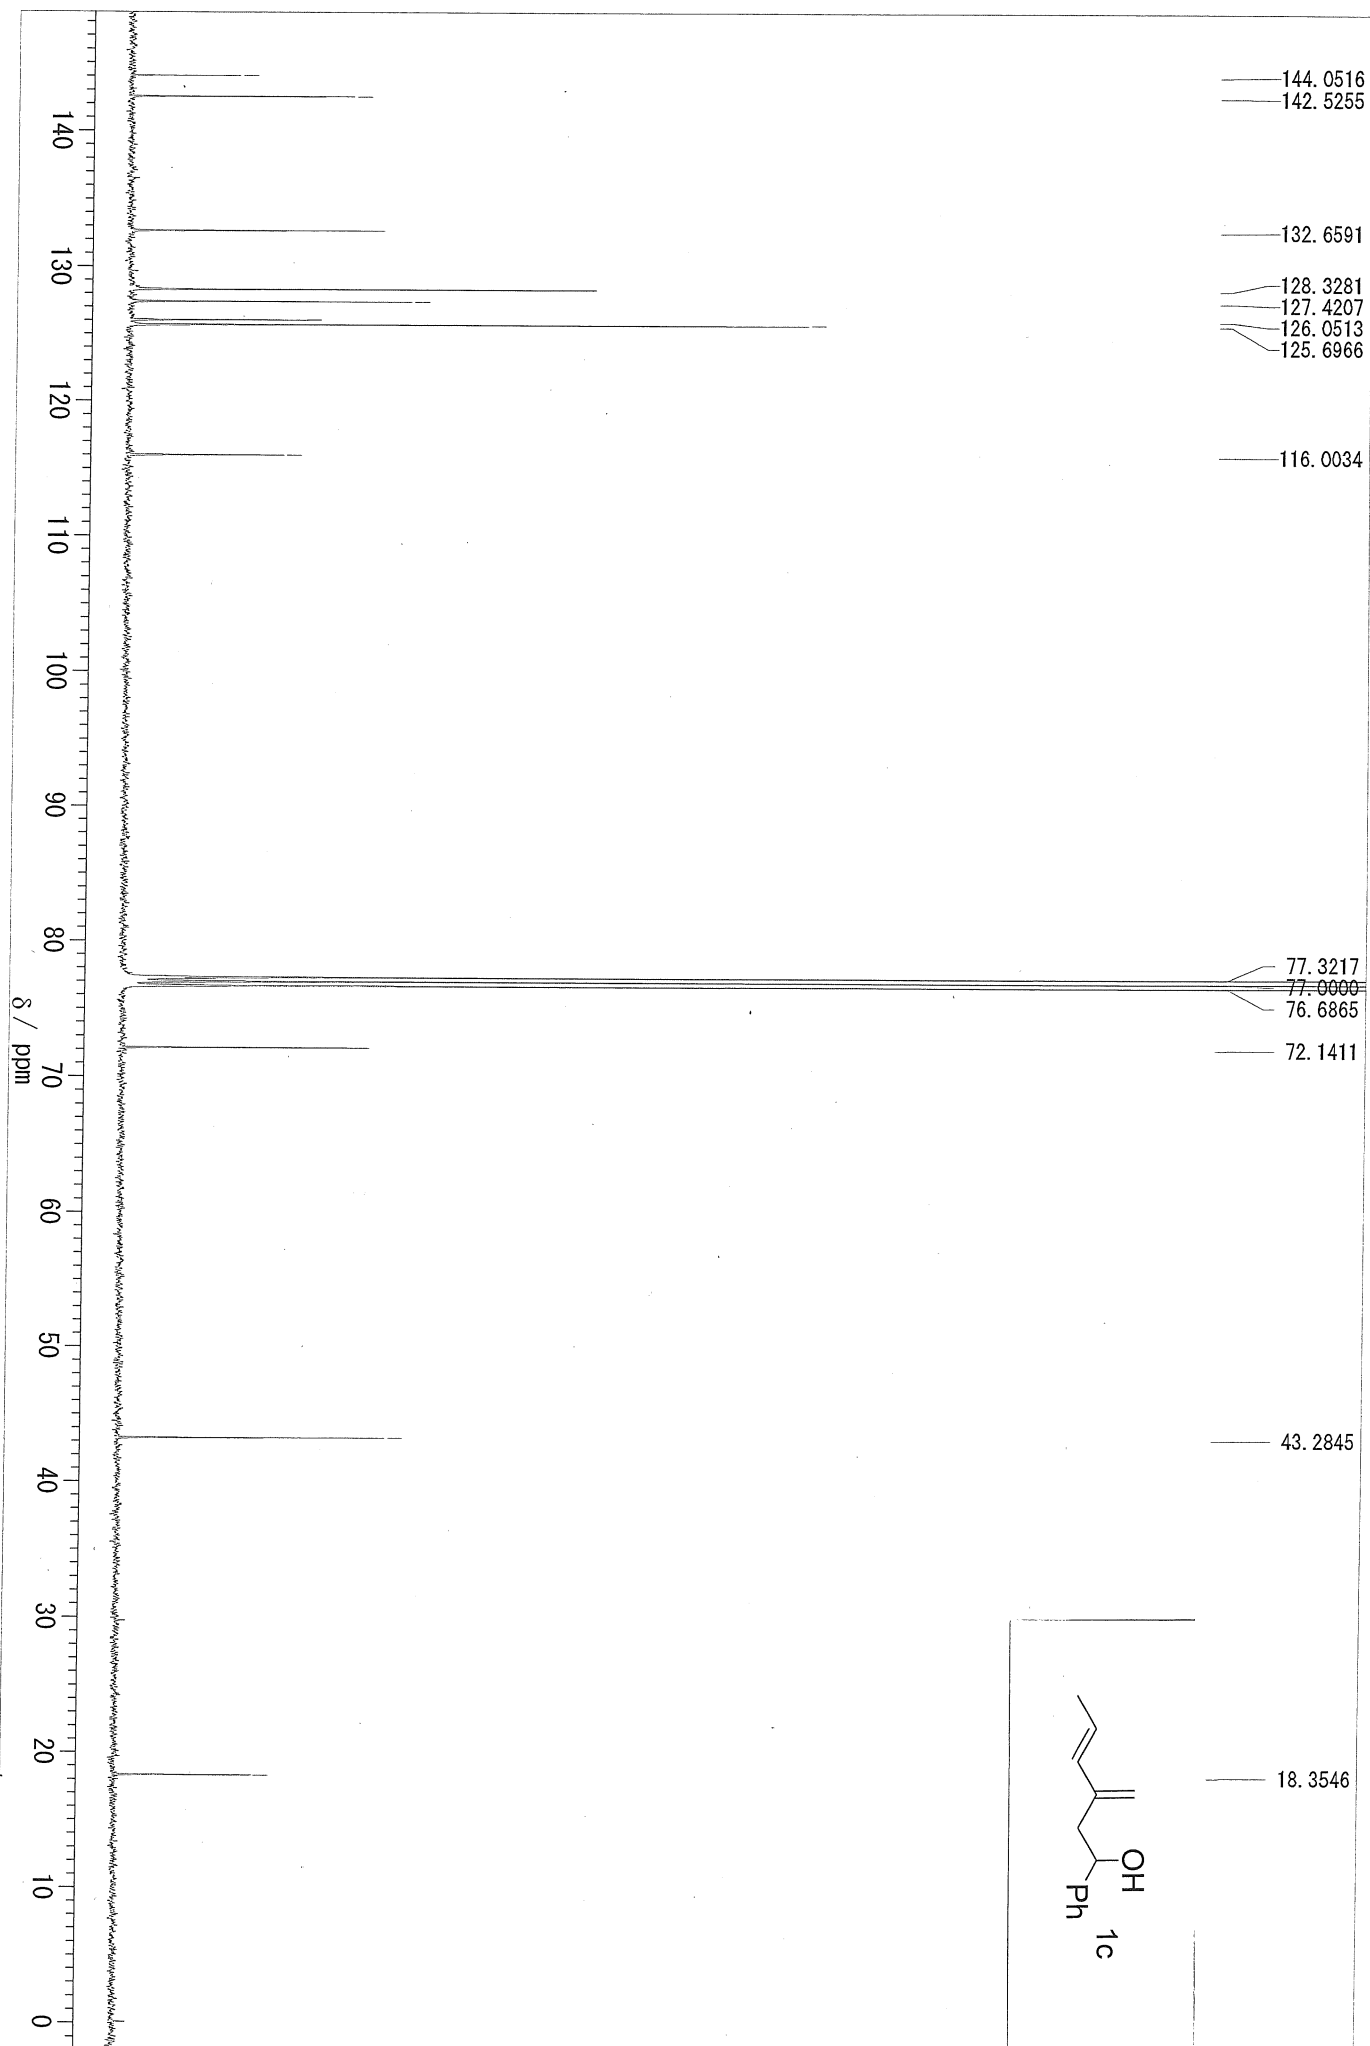

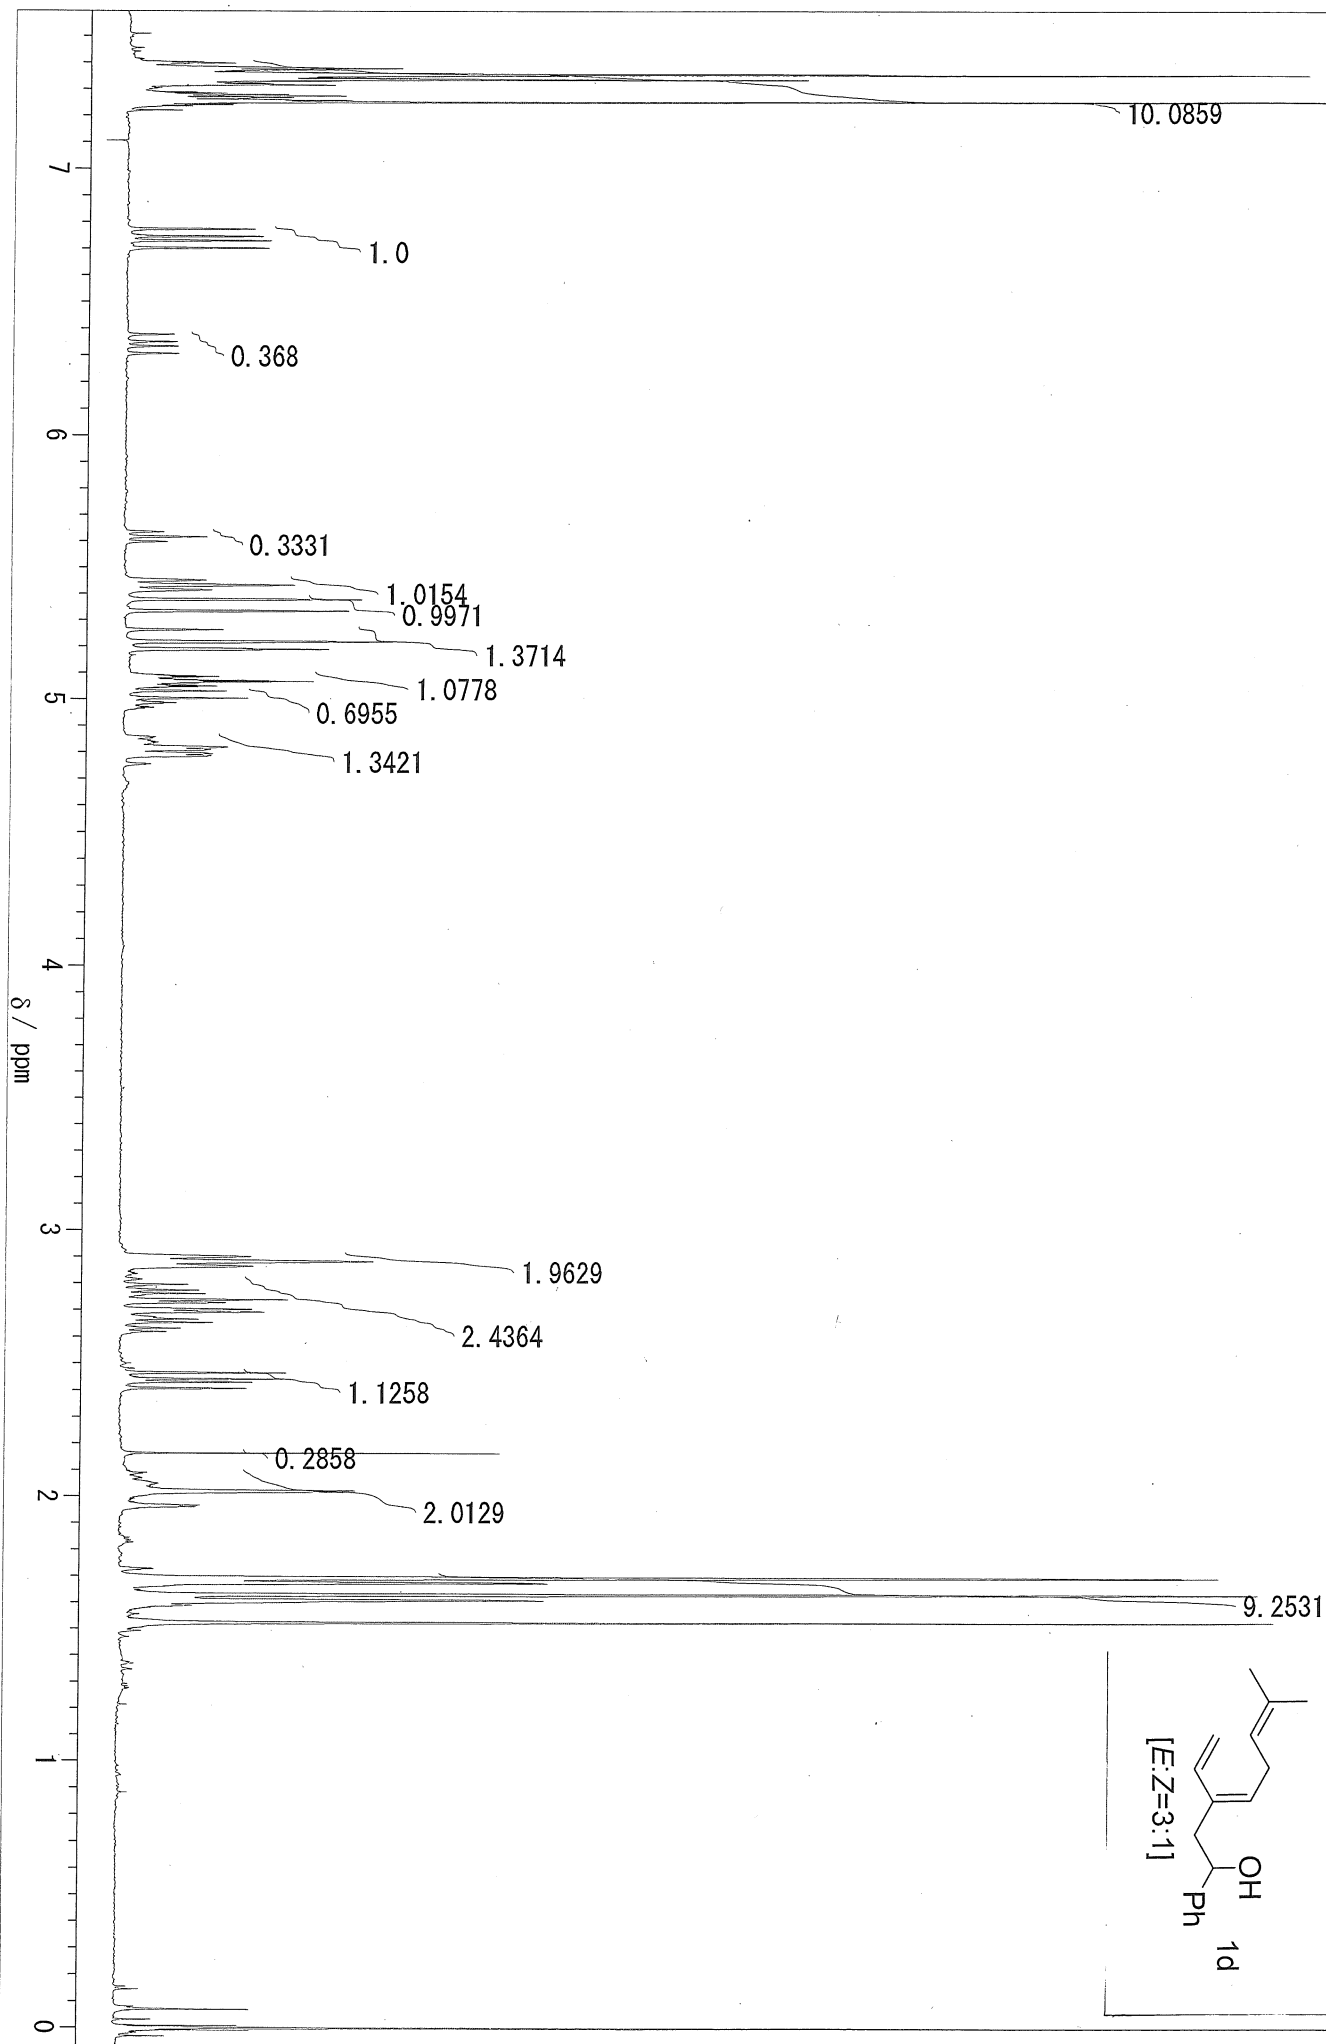

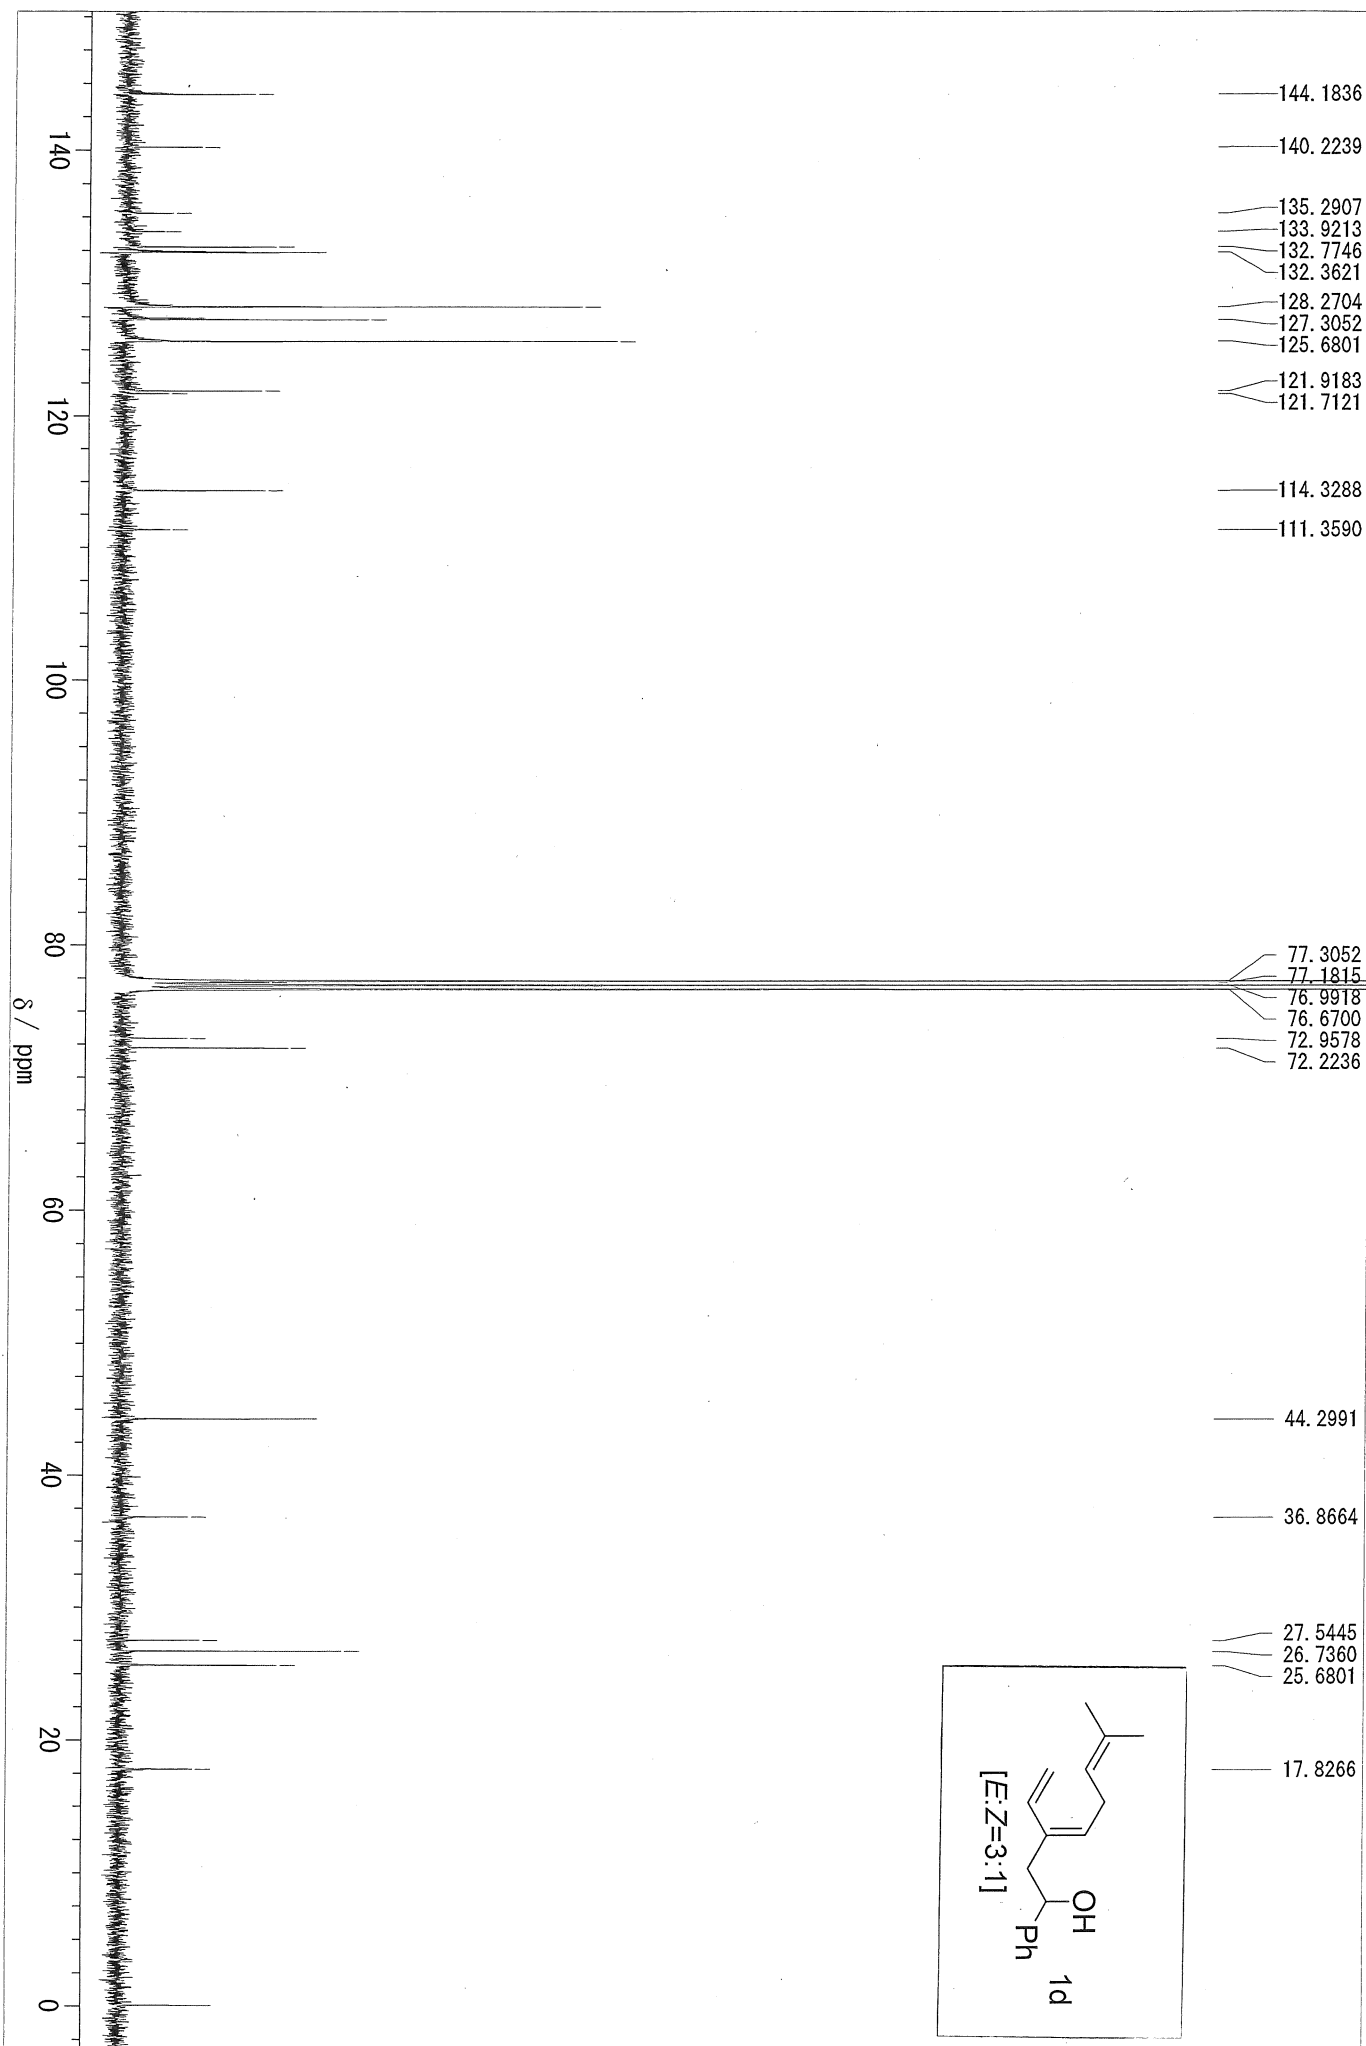

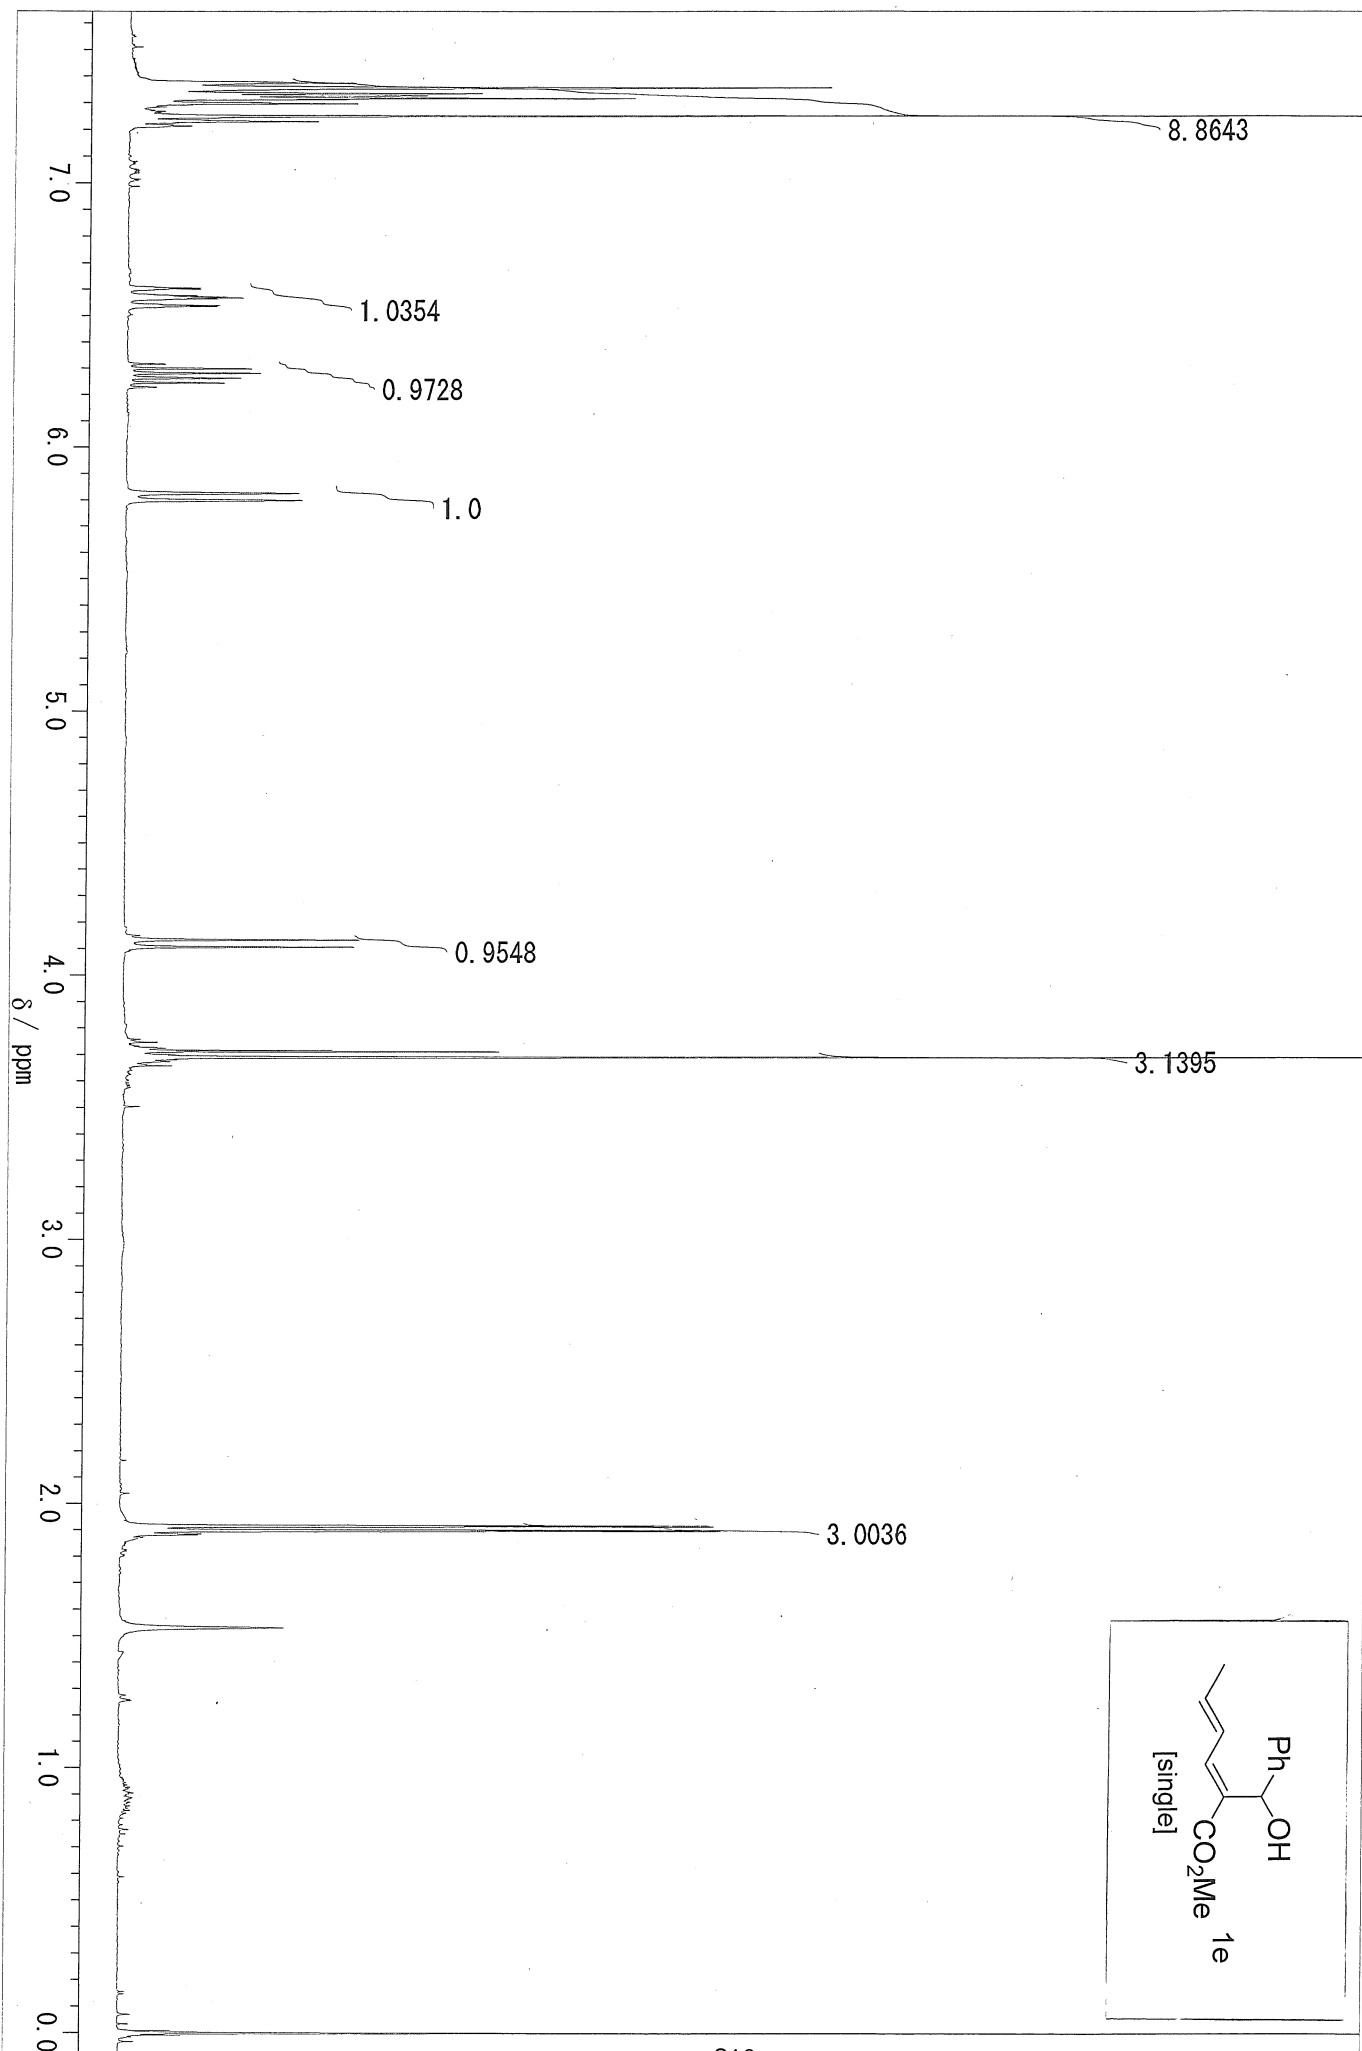



methyl sorbate, C6D6

*Solvent* C6D6

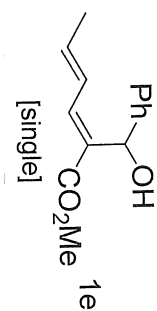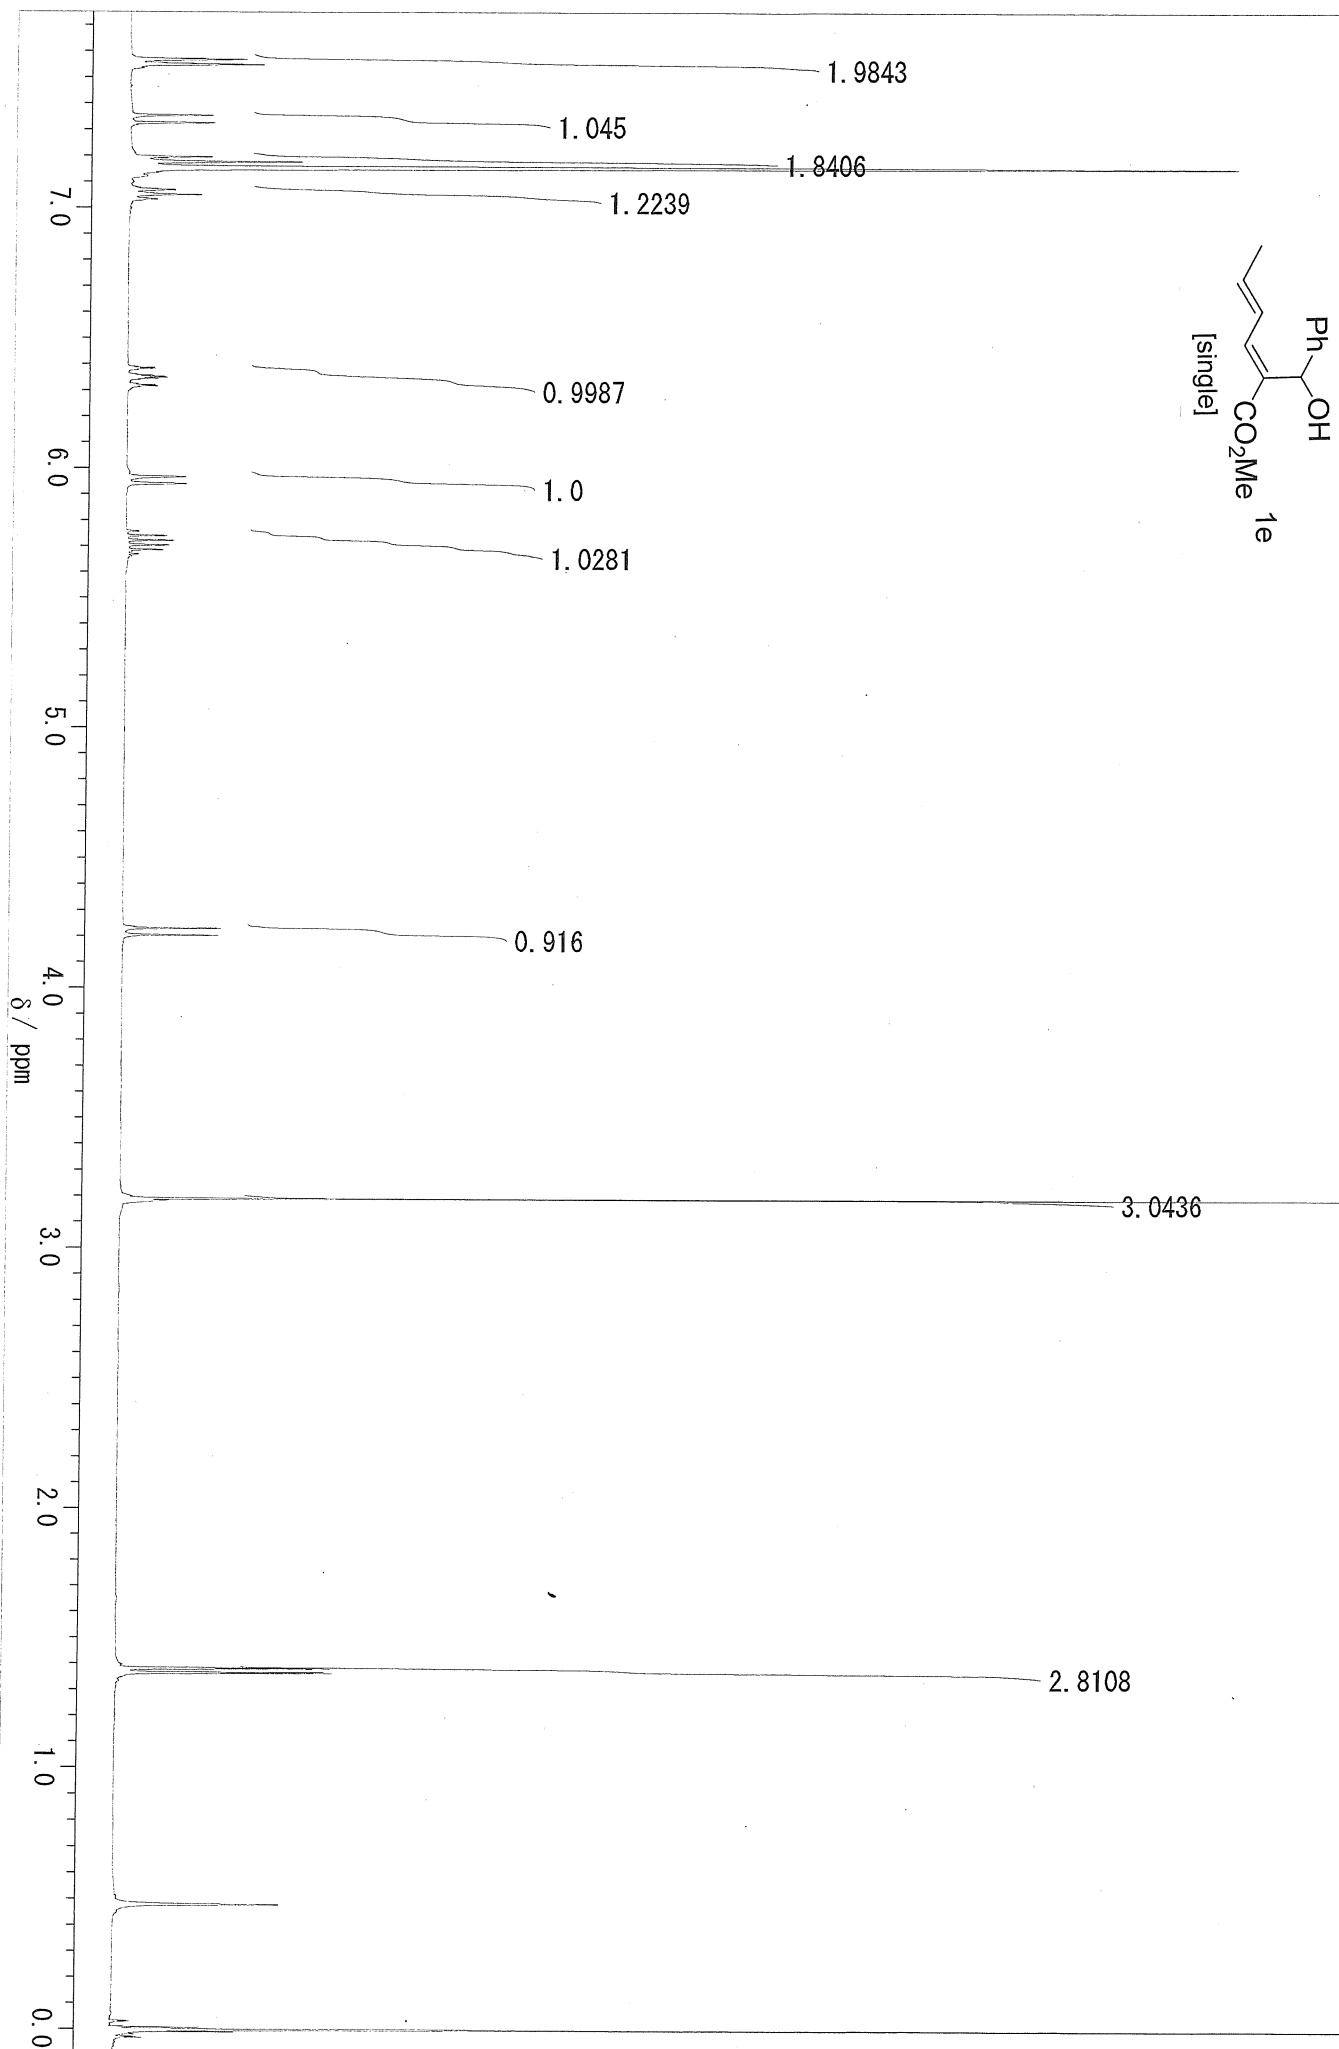

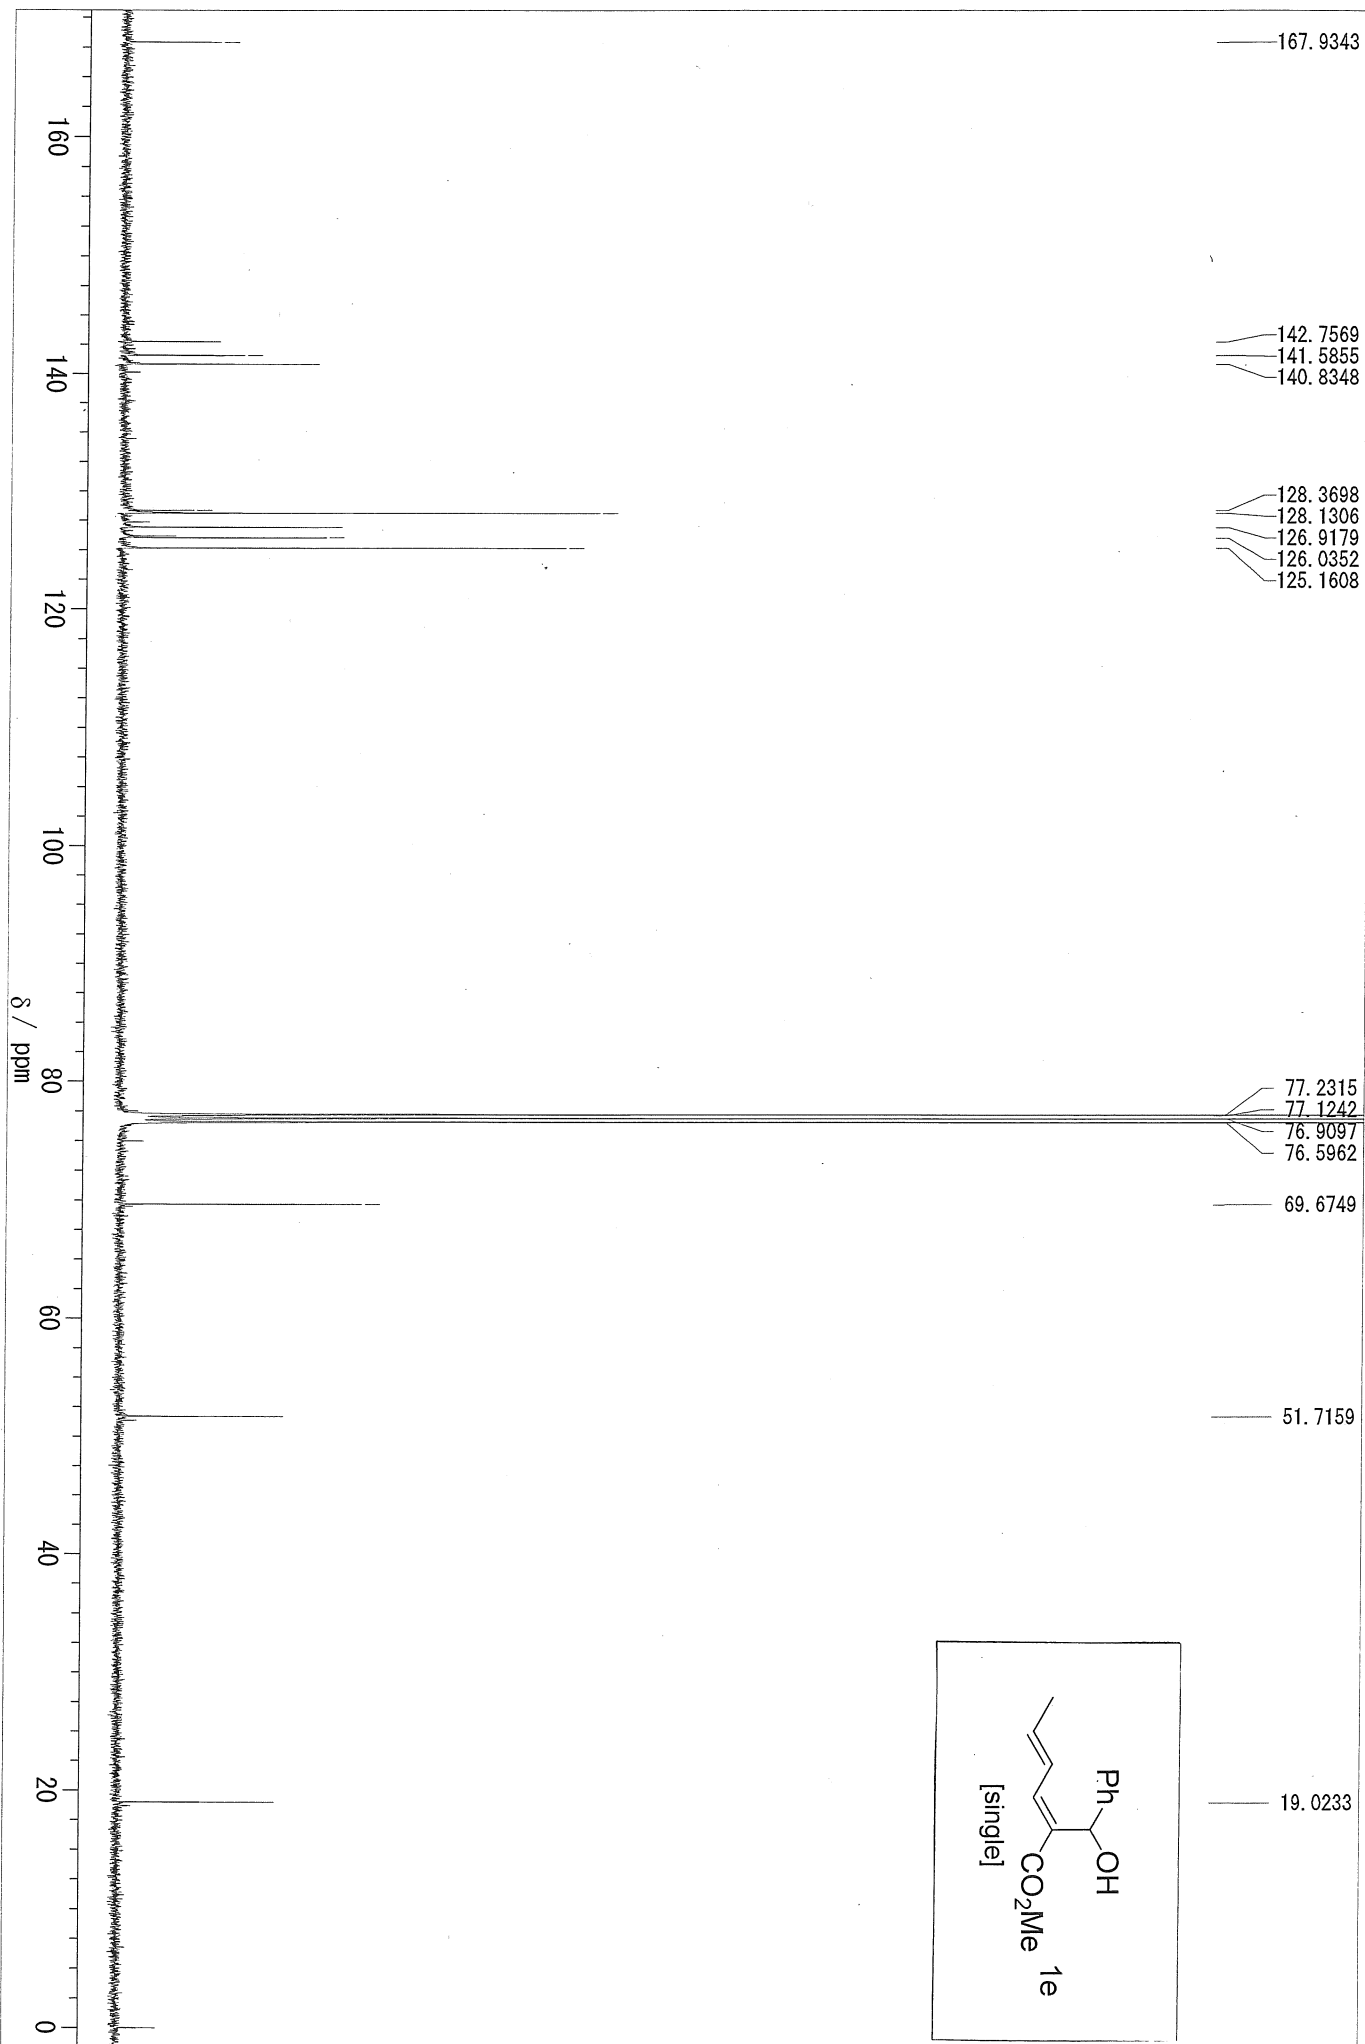

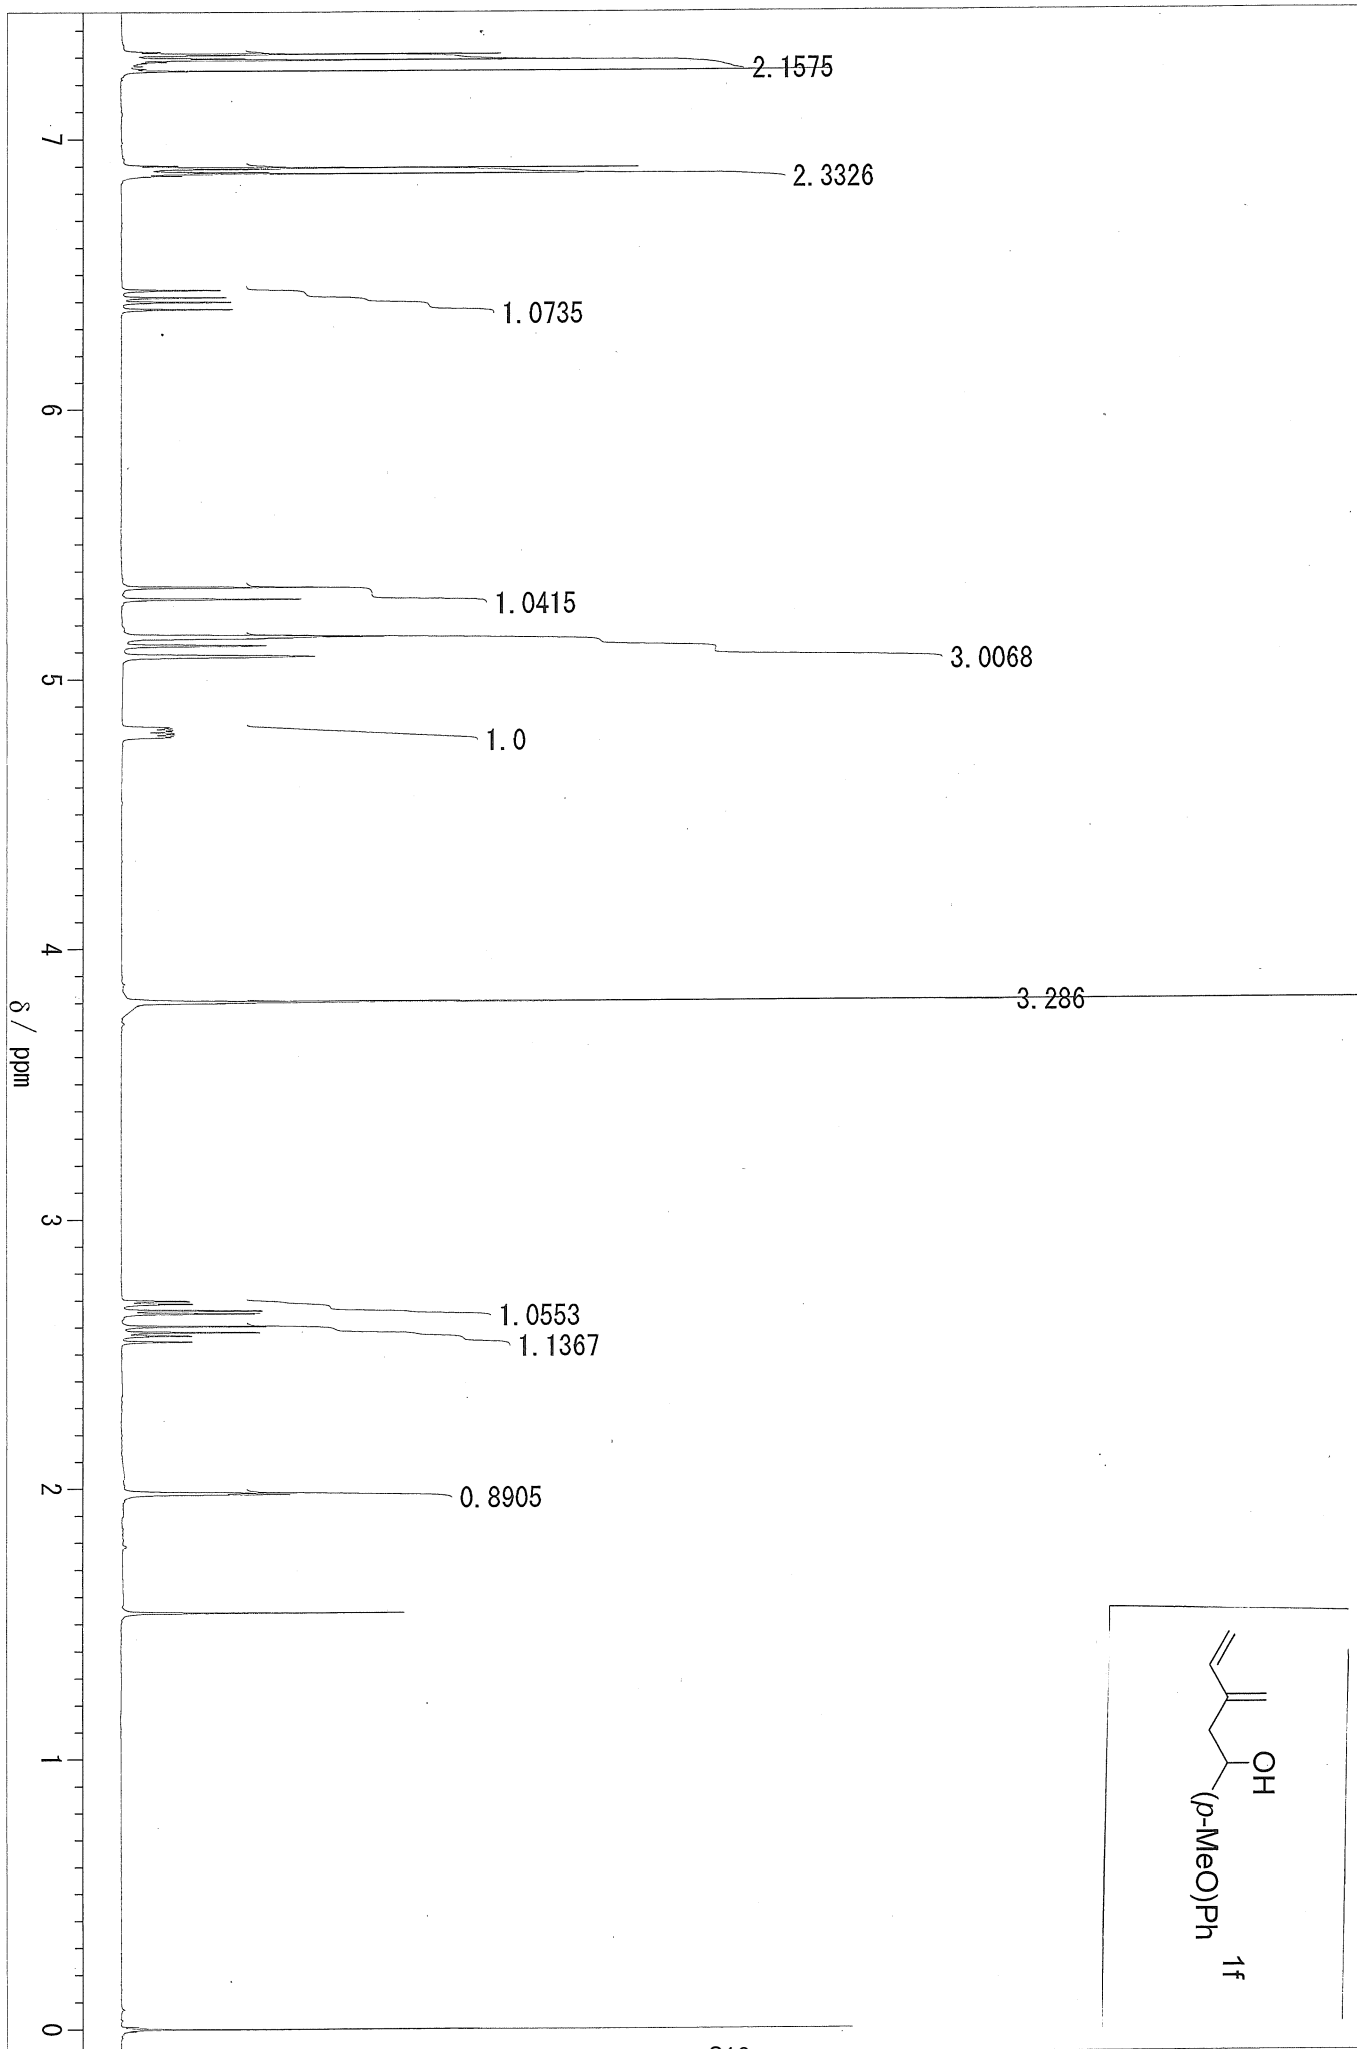

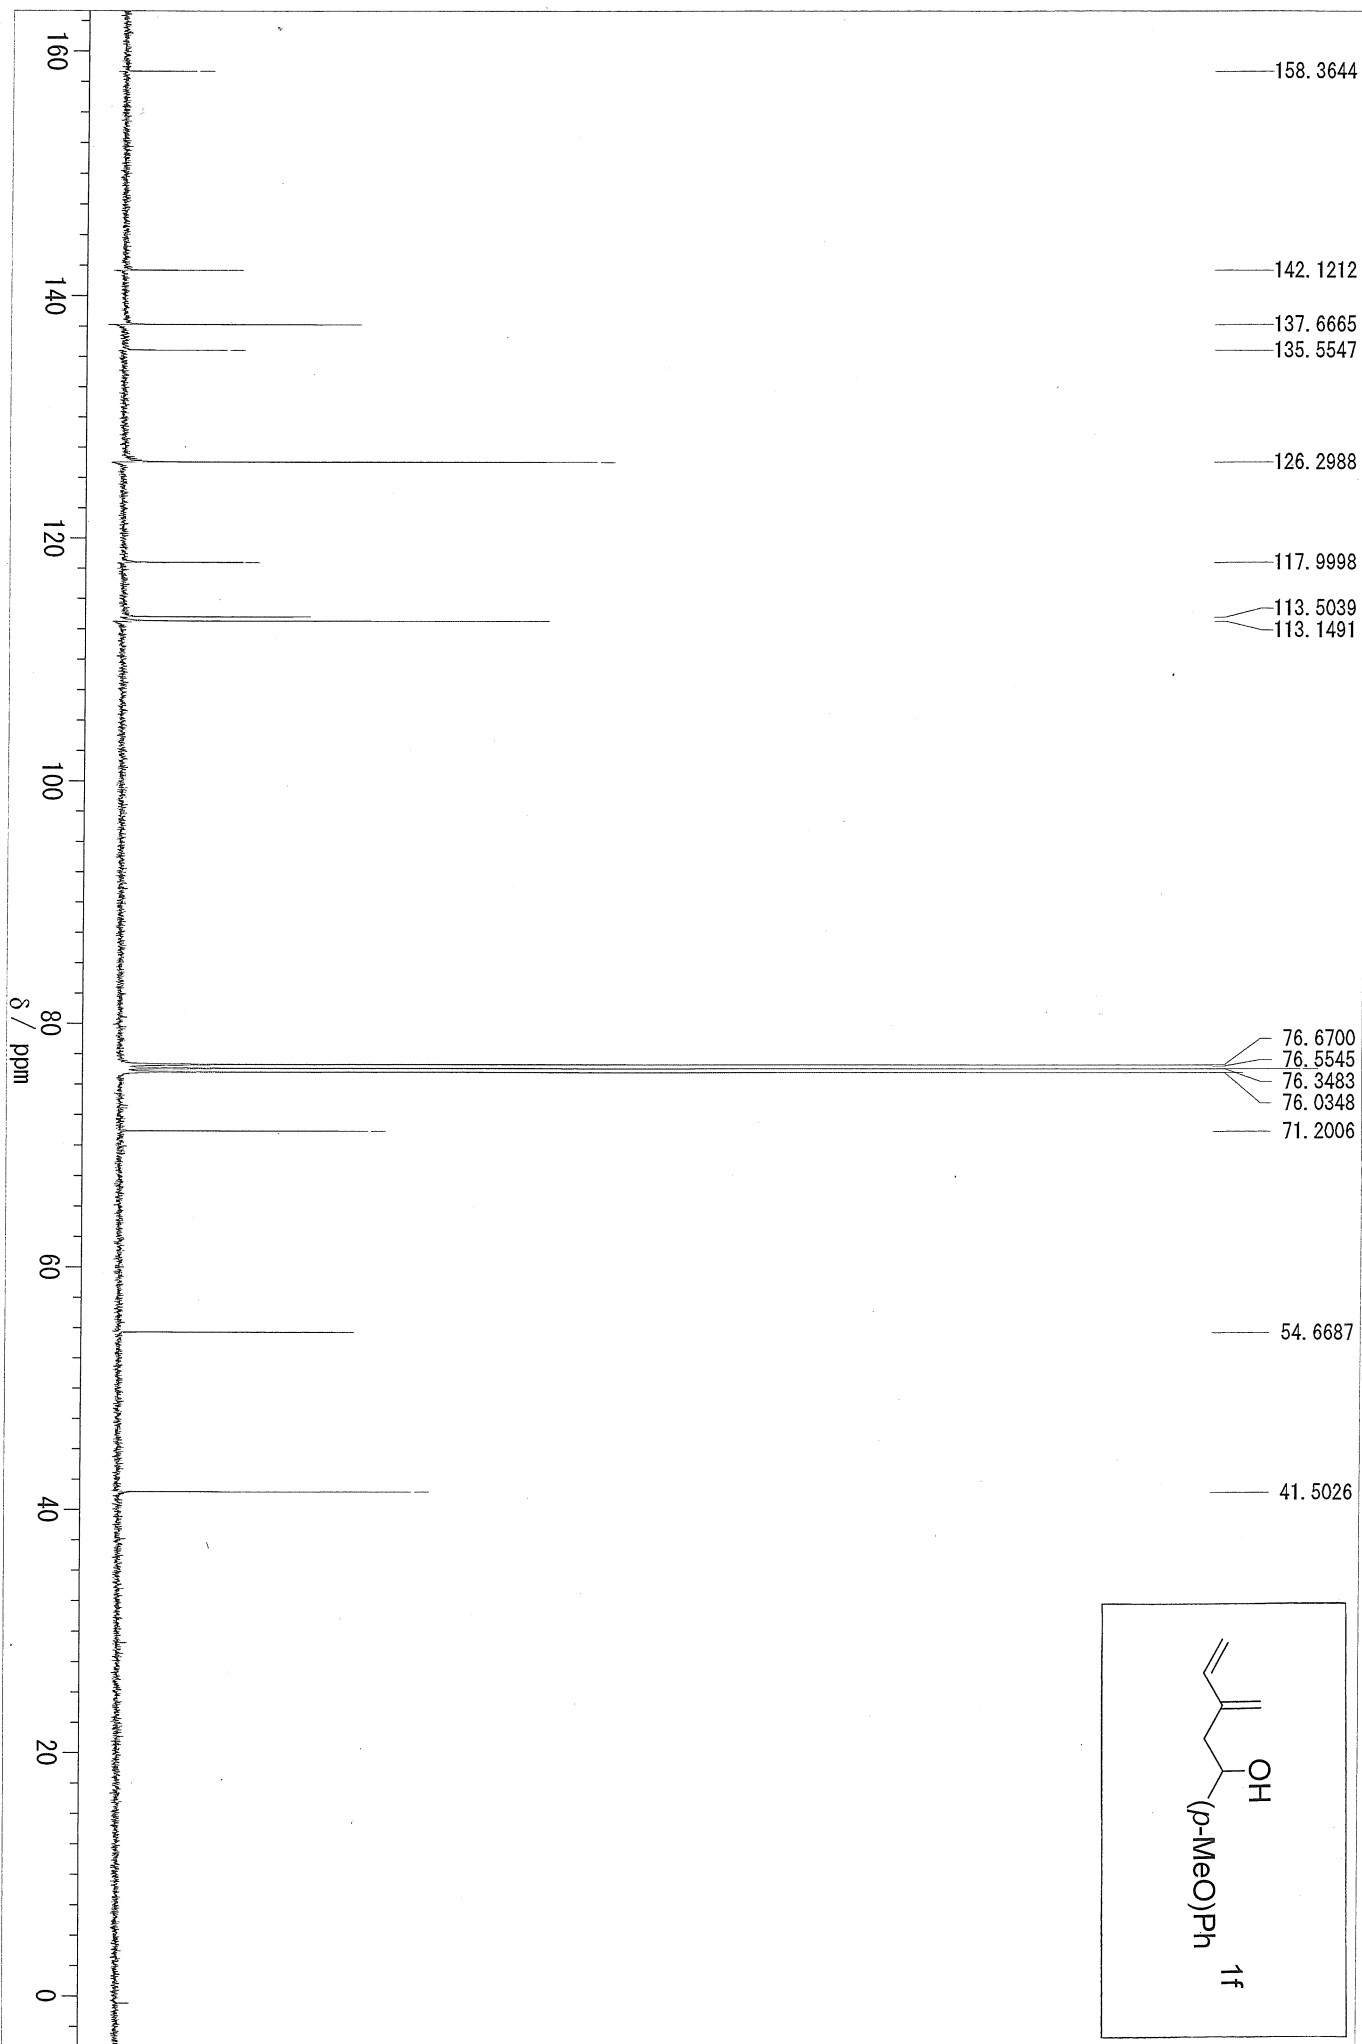

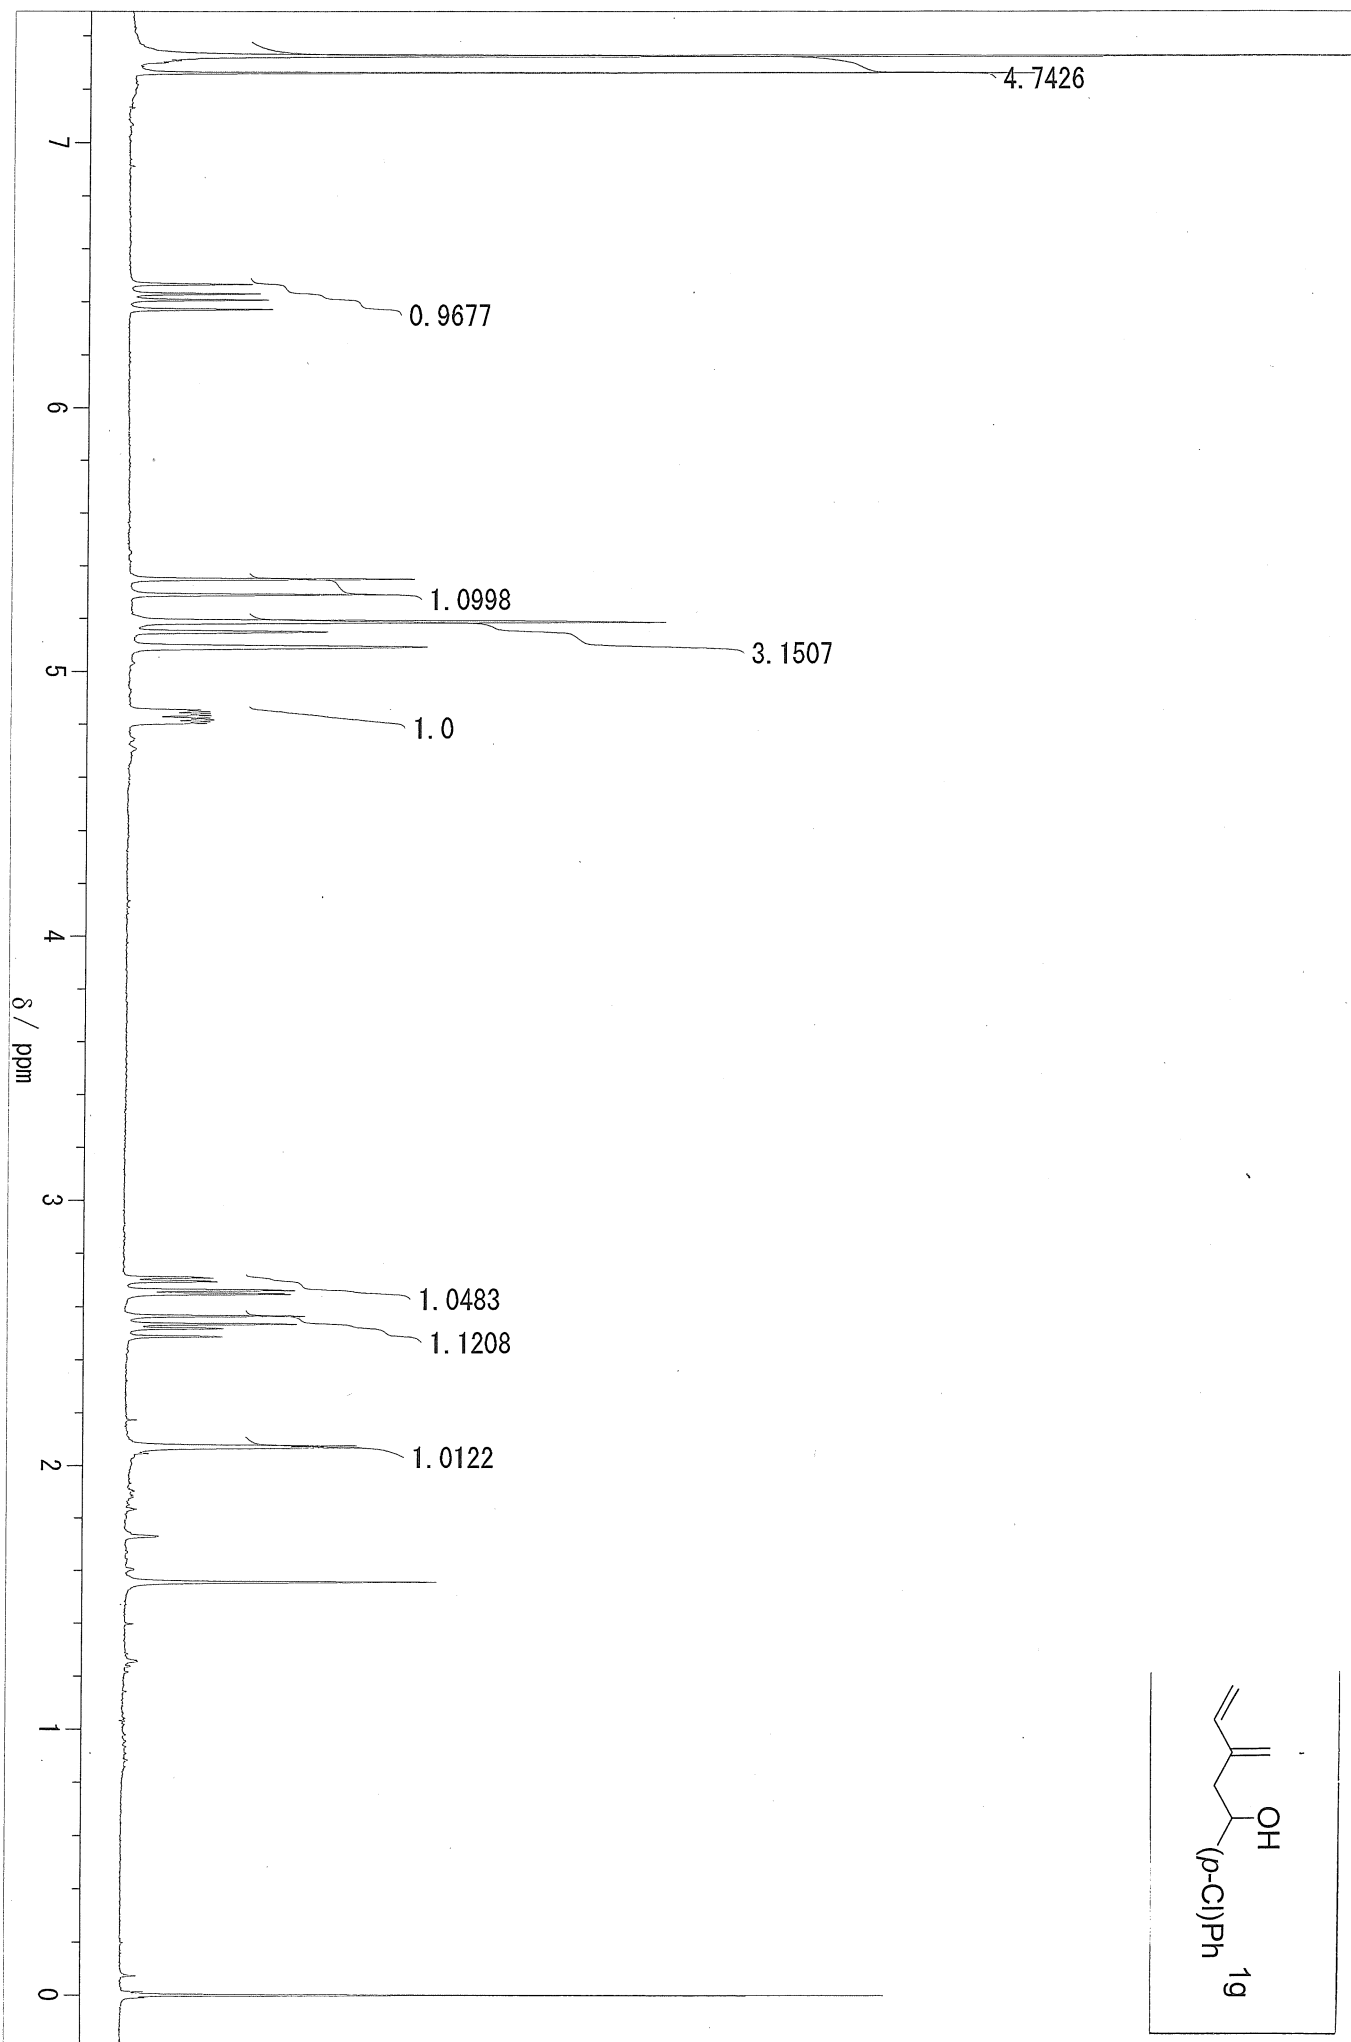

p-chlorobenzaldehyde,  $^{13}\text{C}$

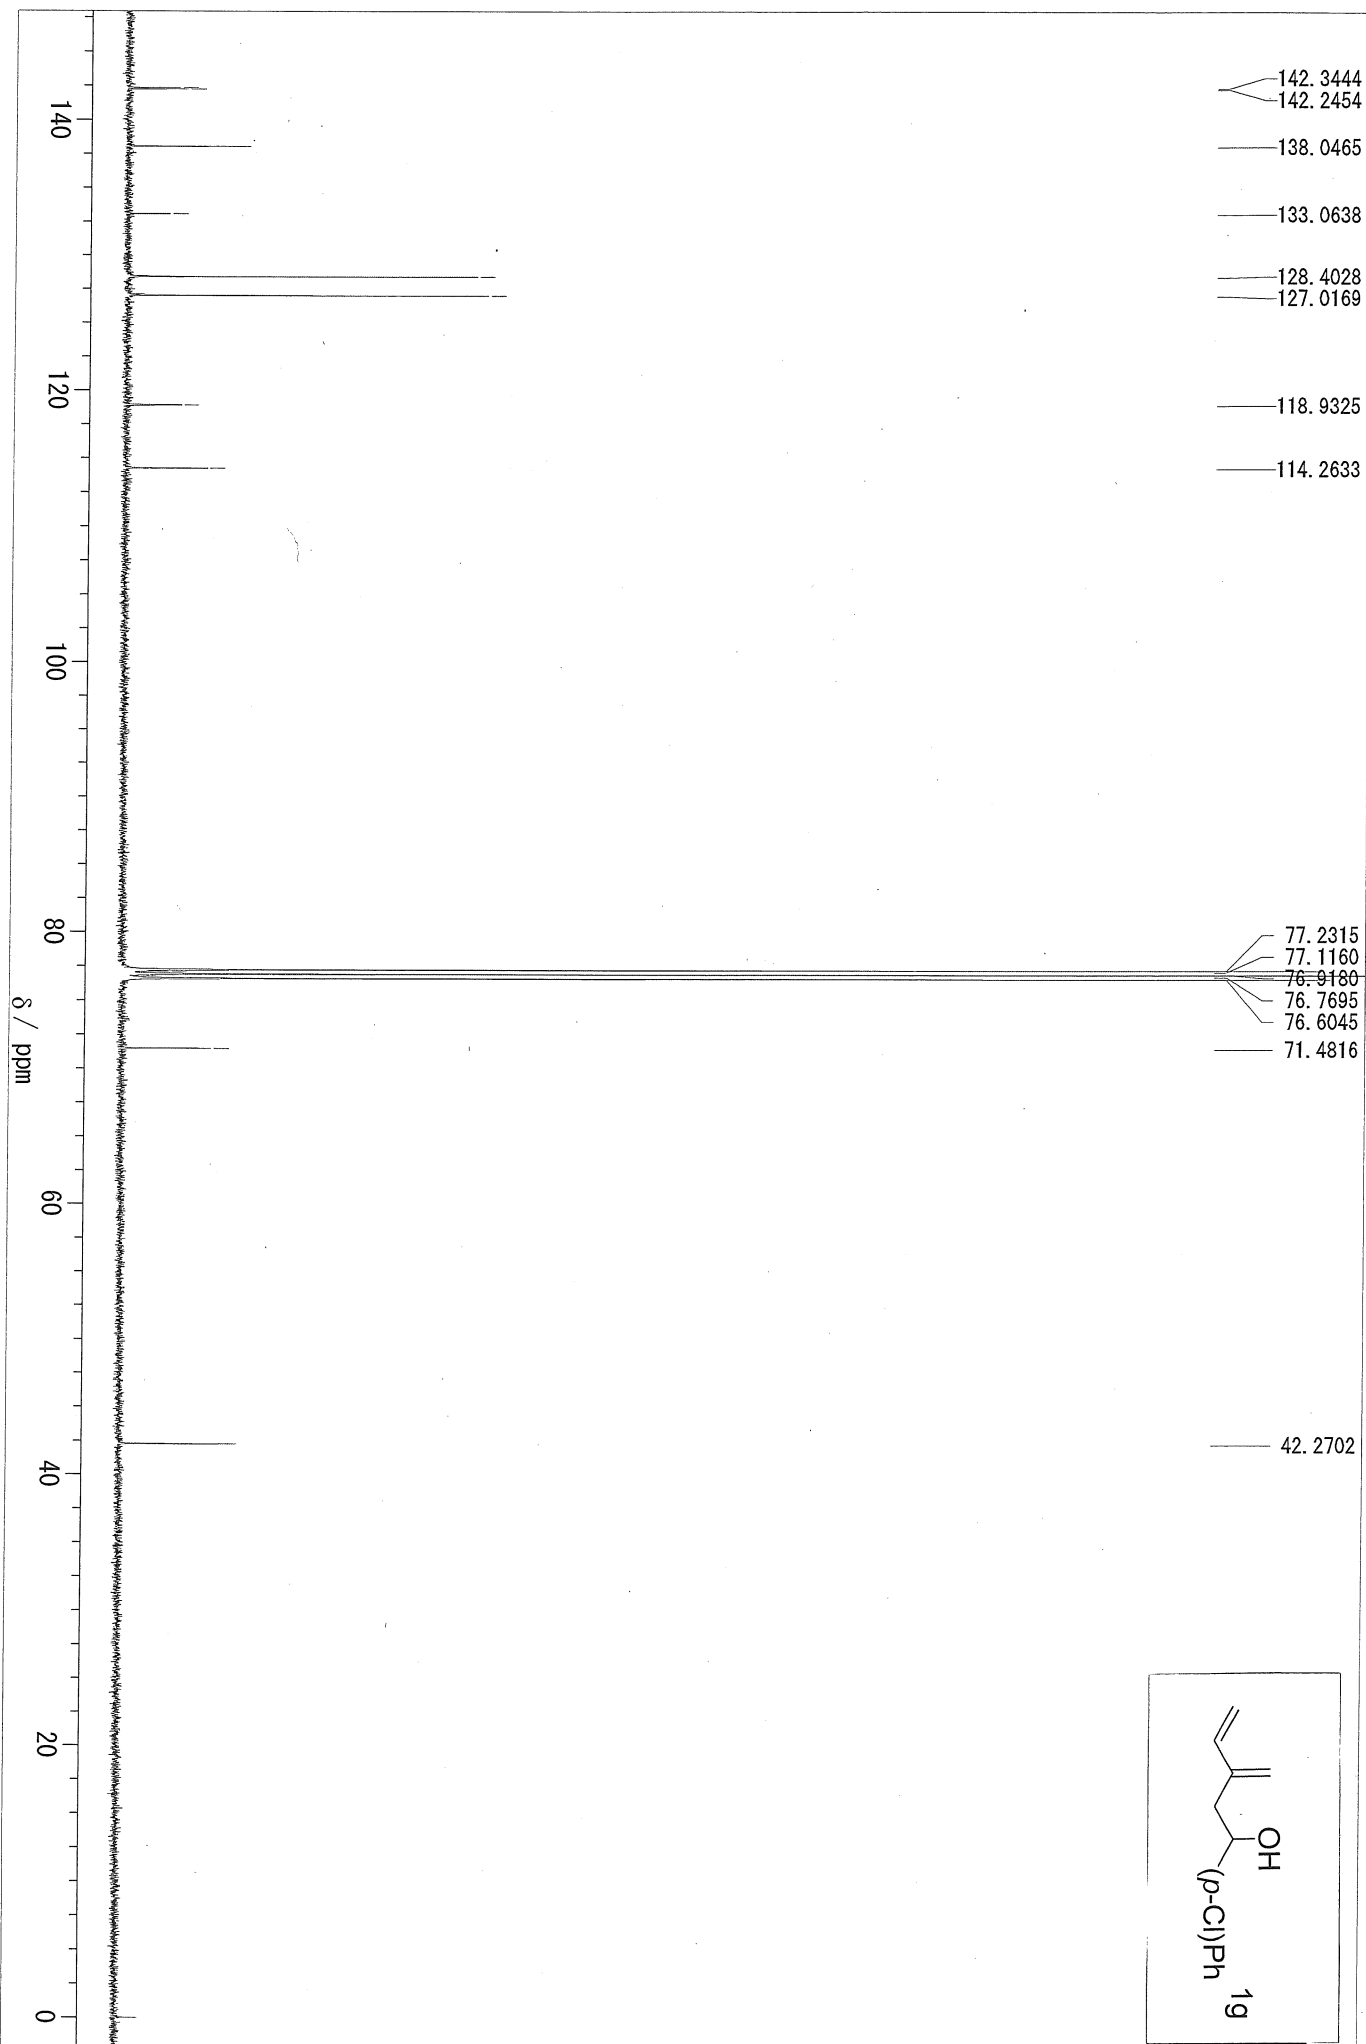

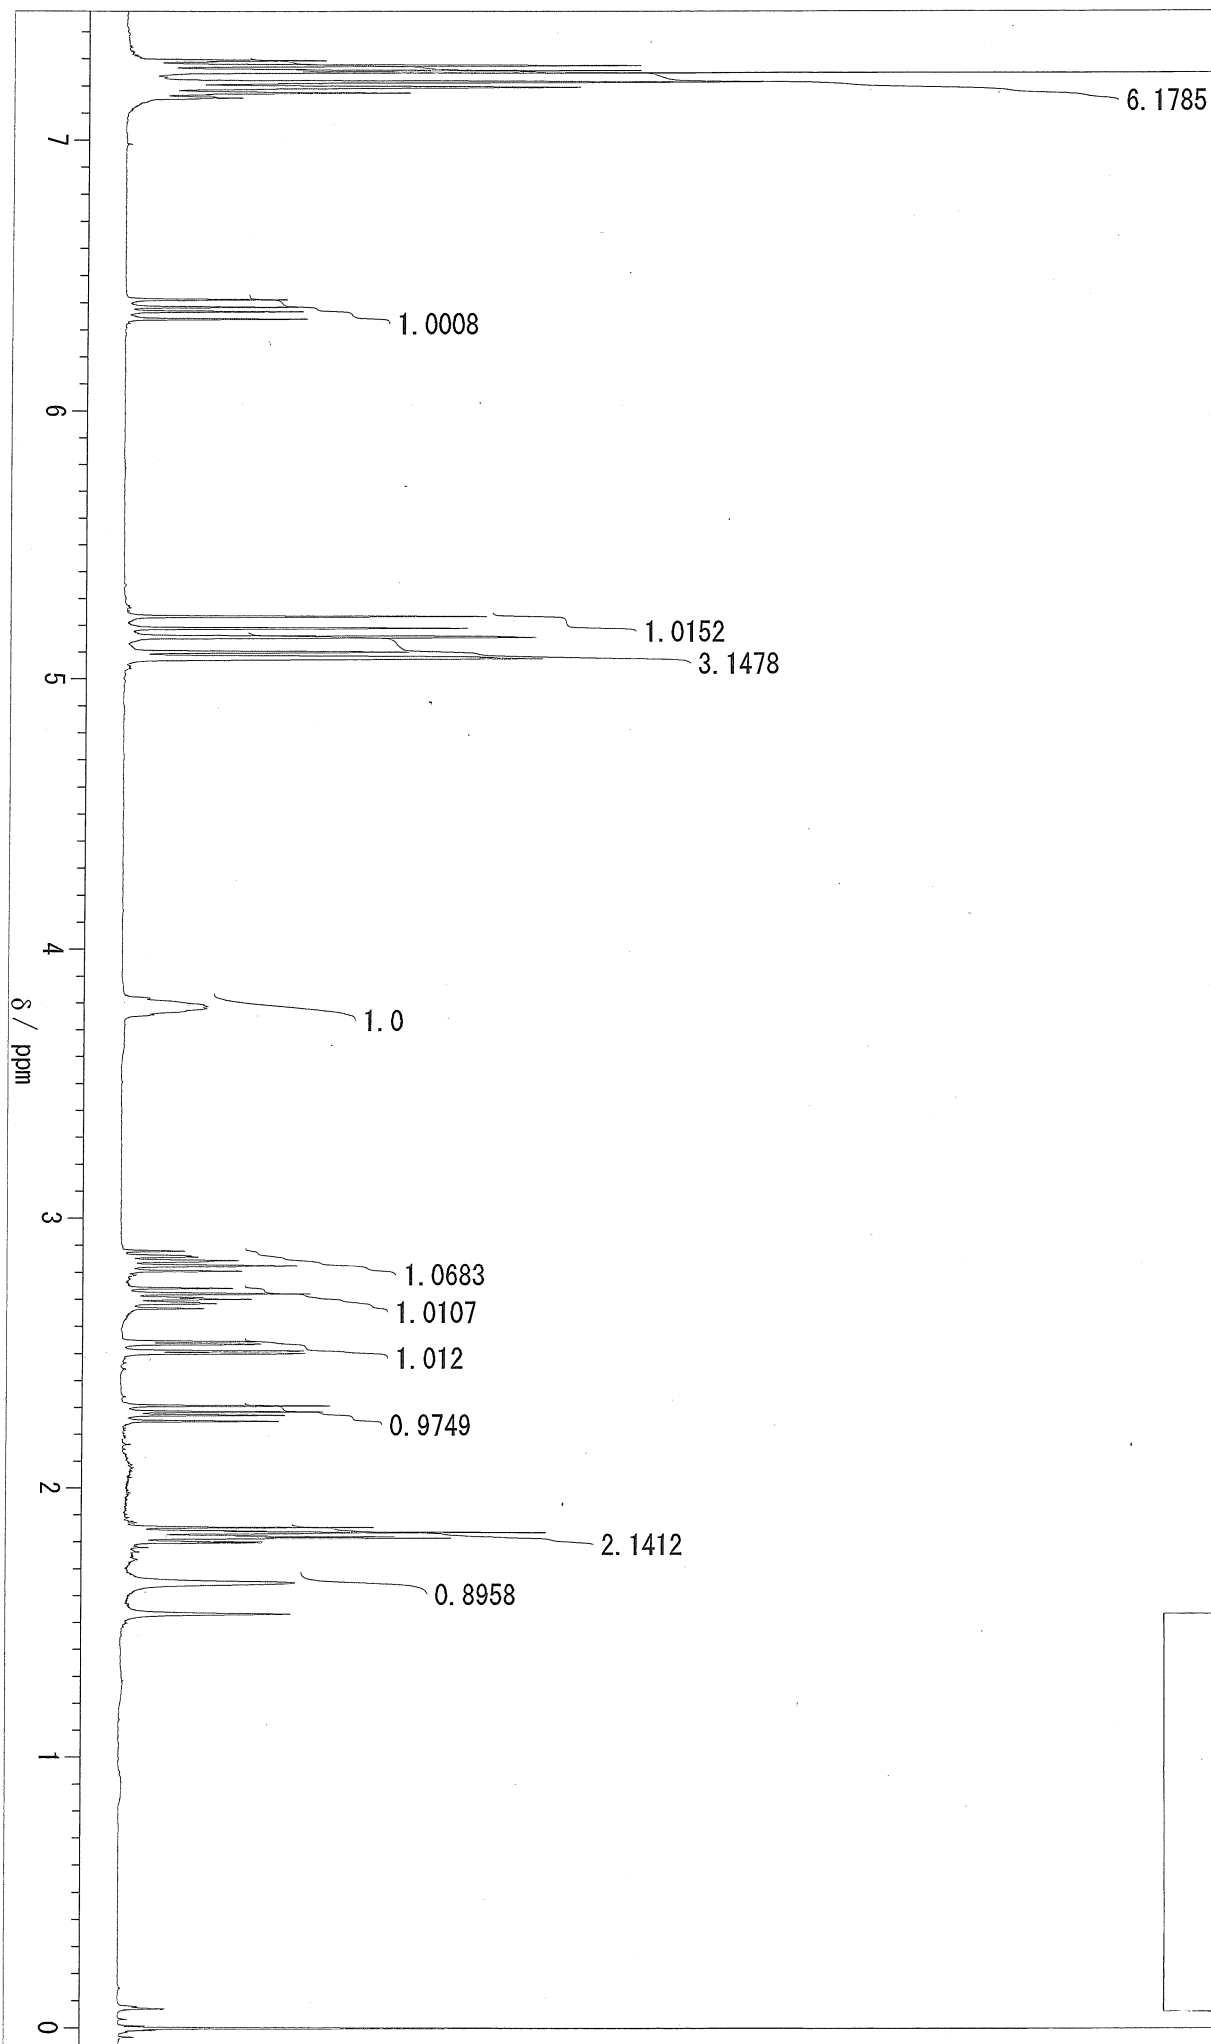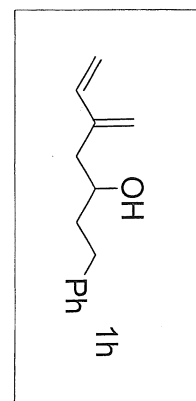

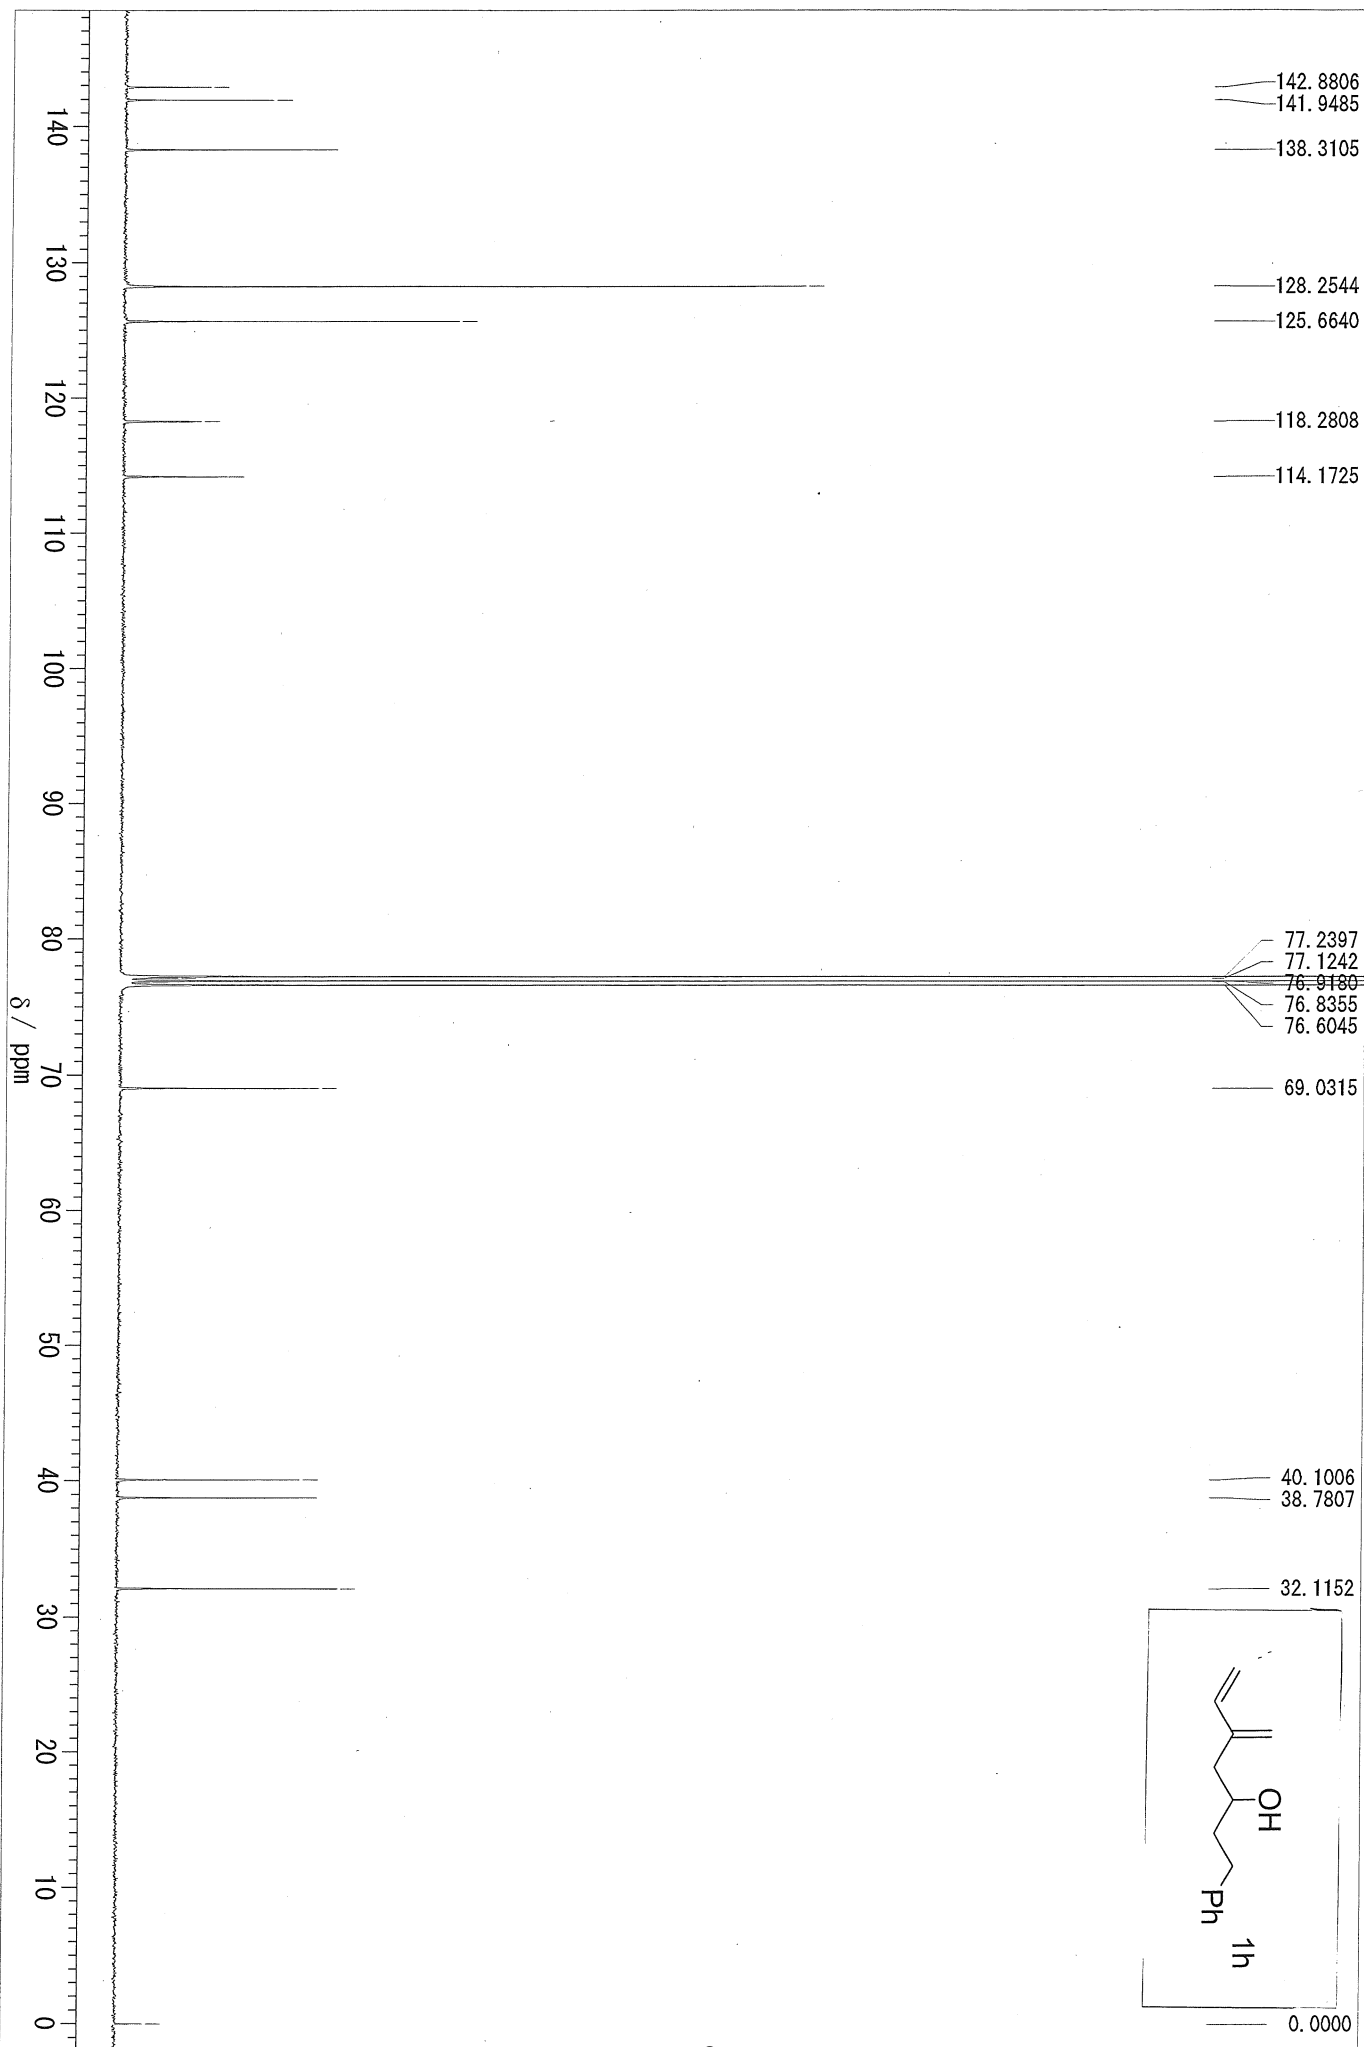



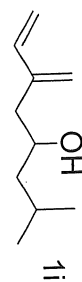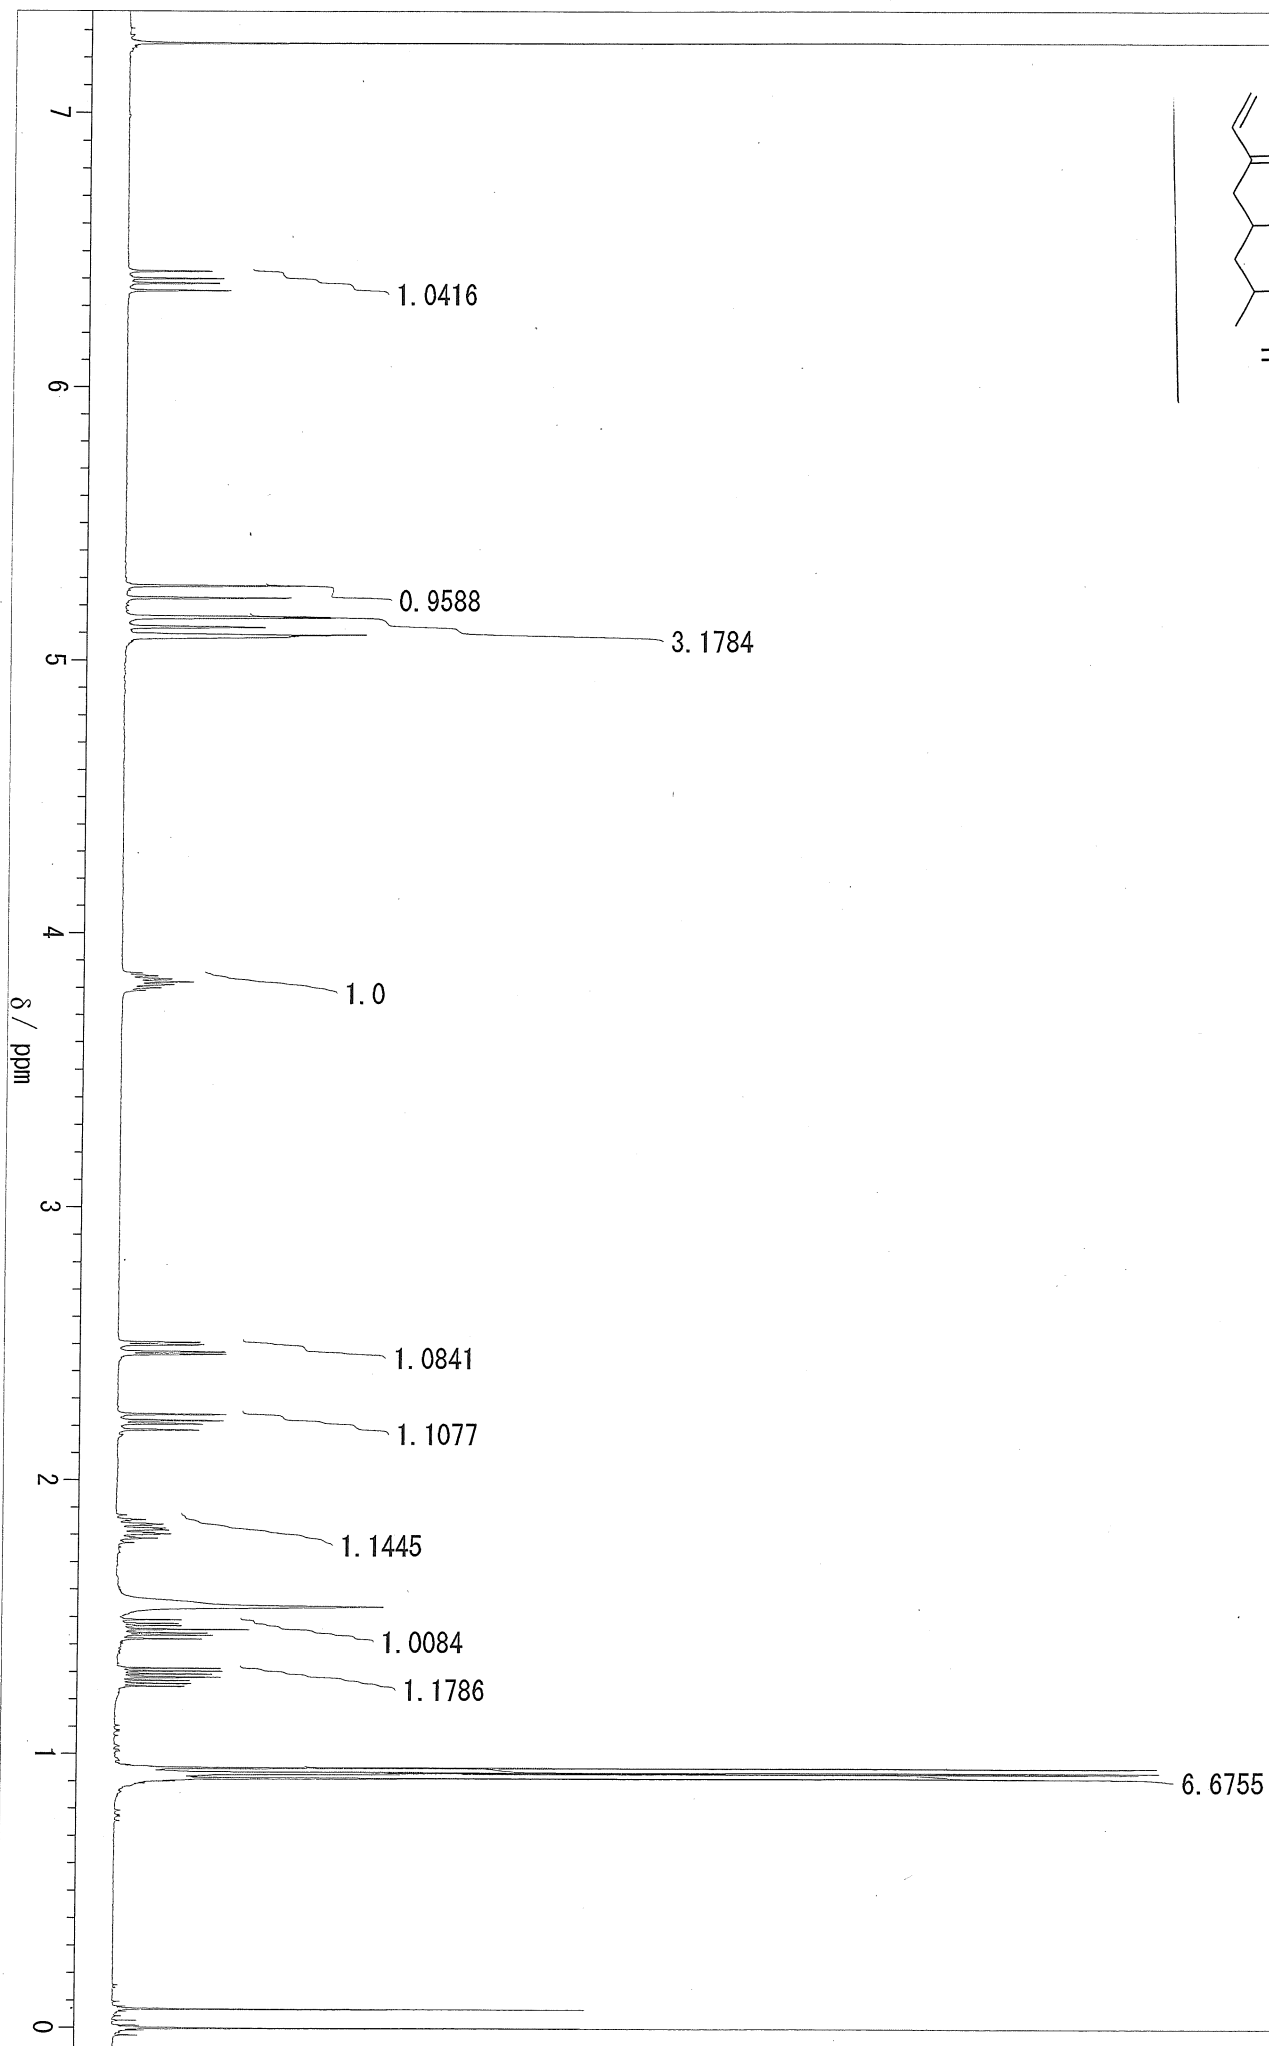

isovaleraldehyde, 13C

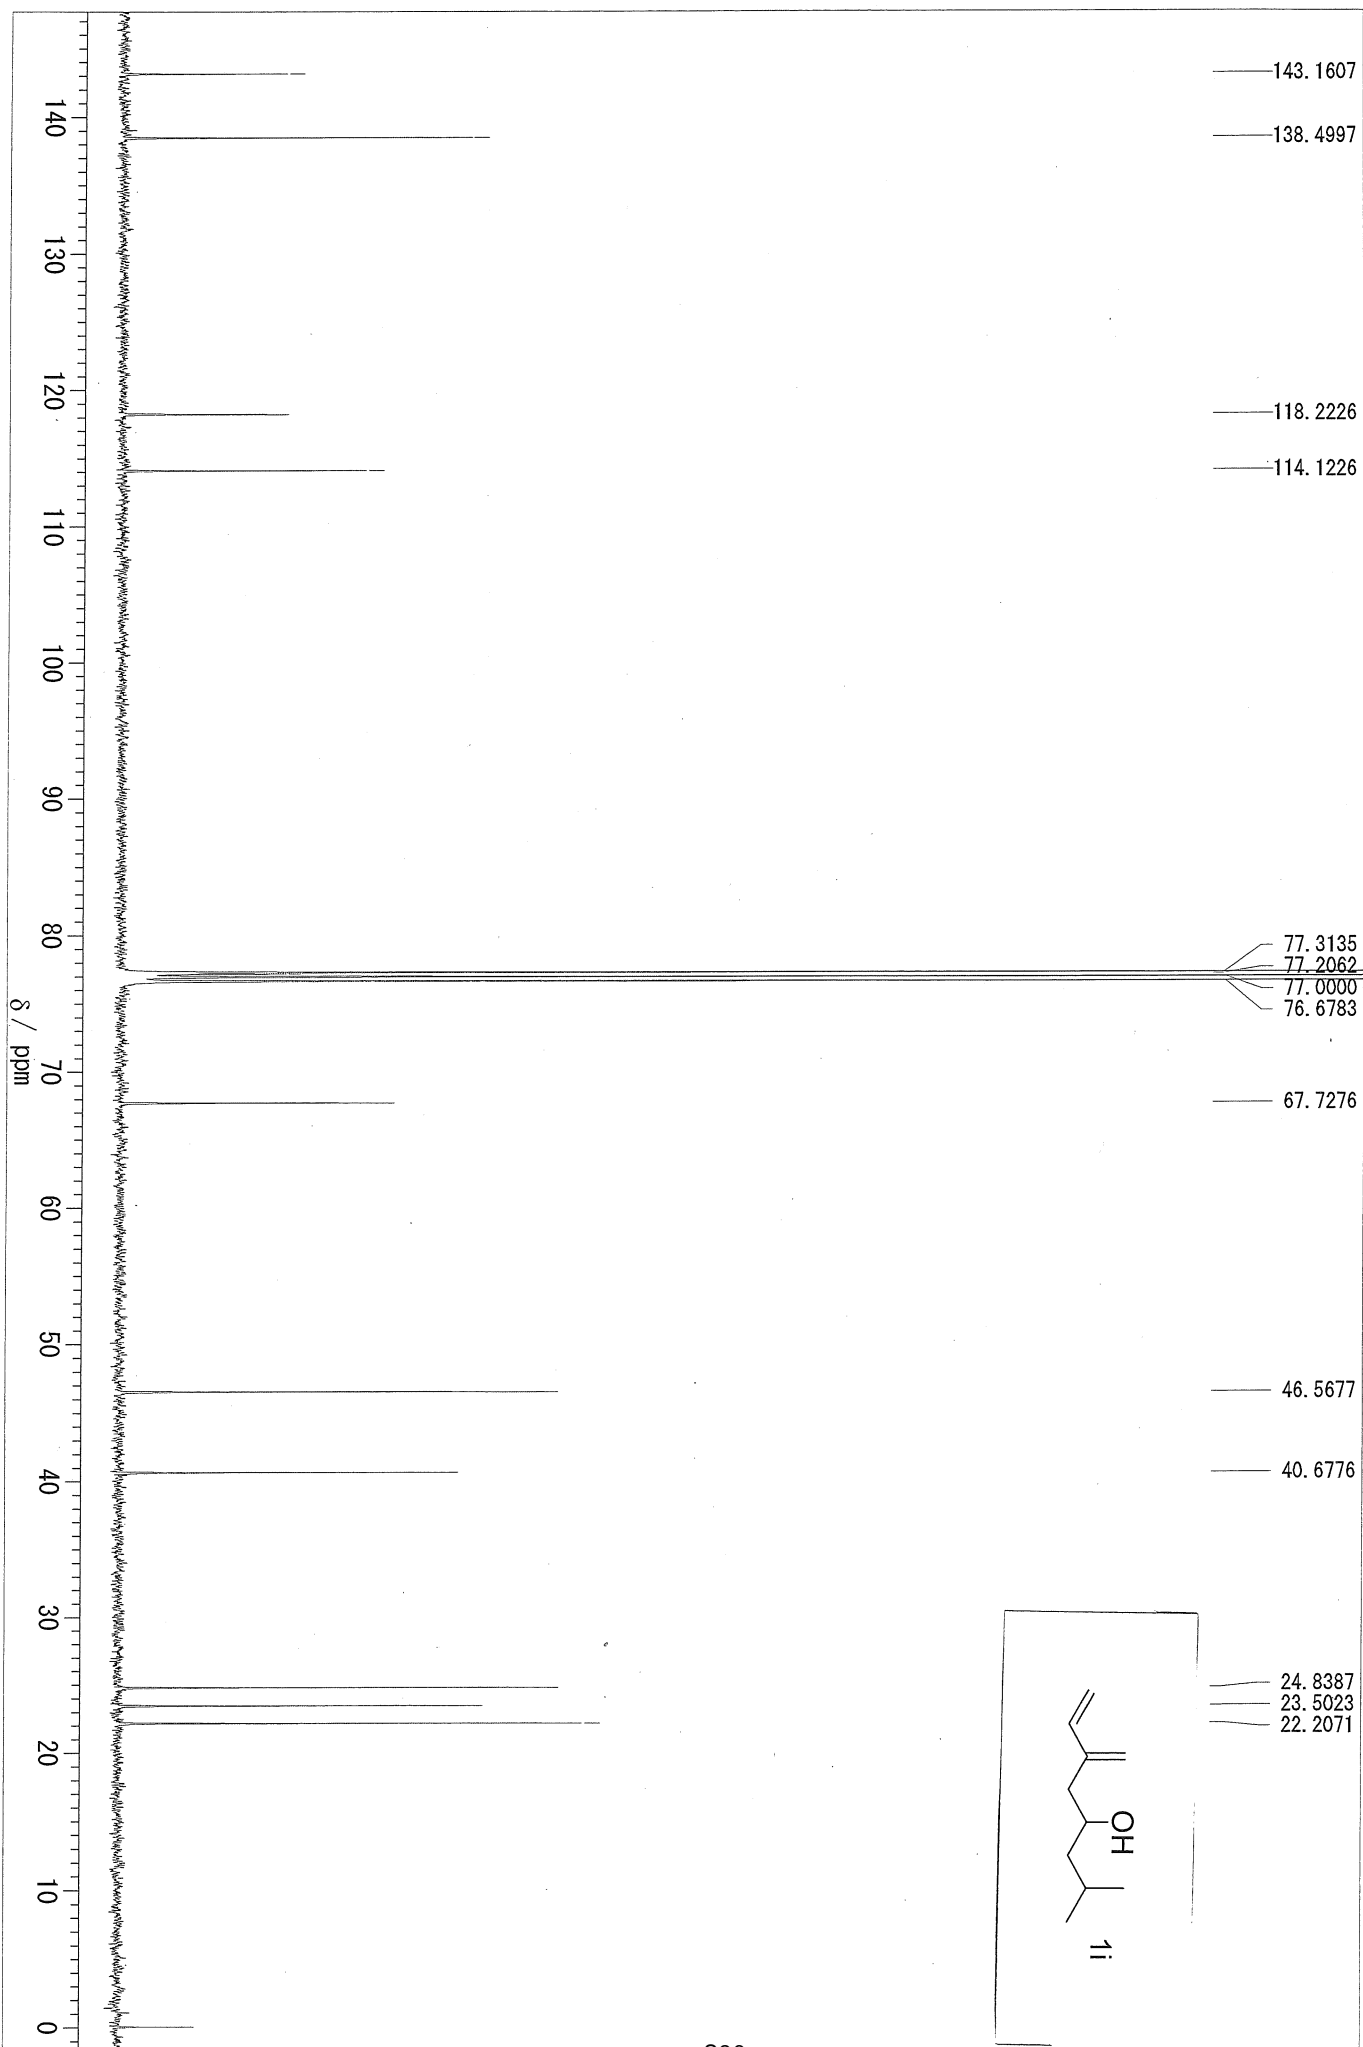

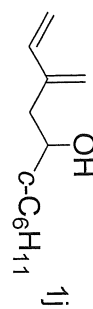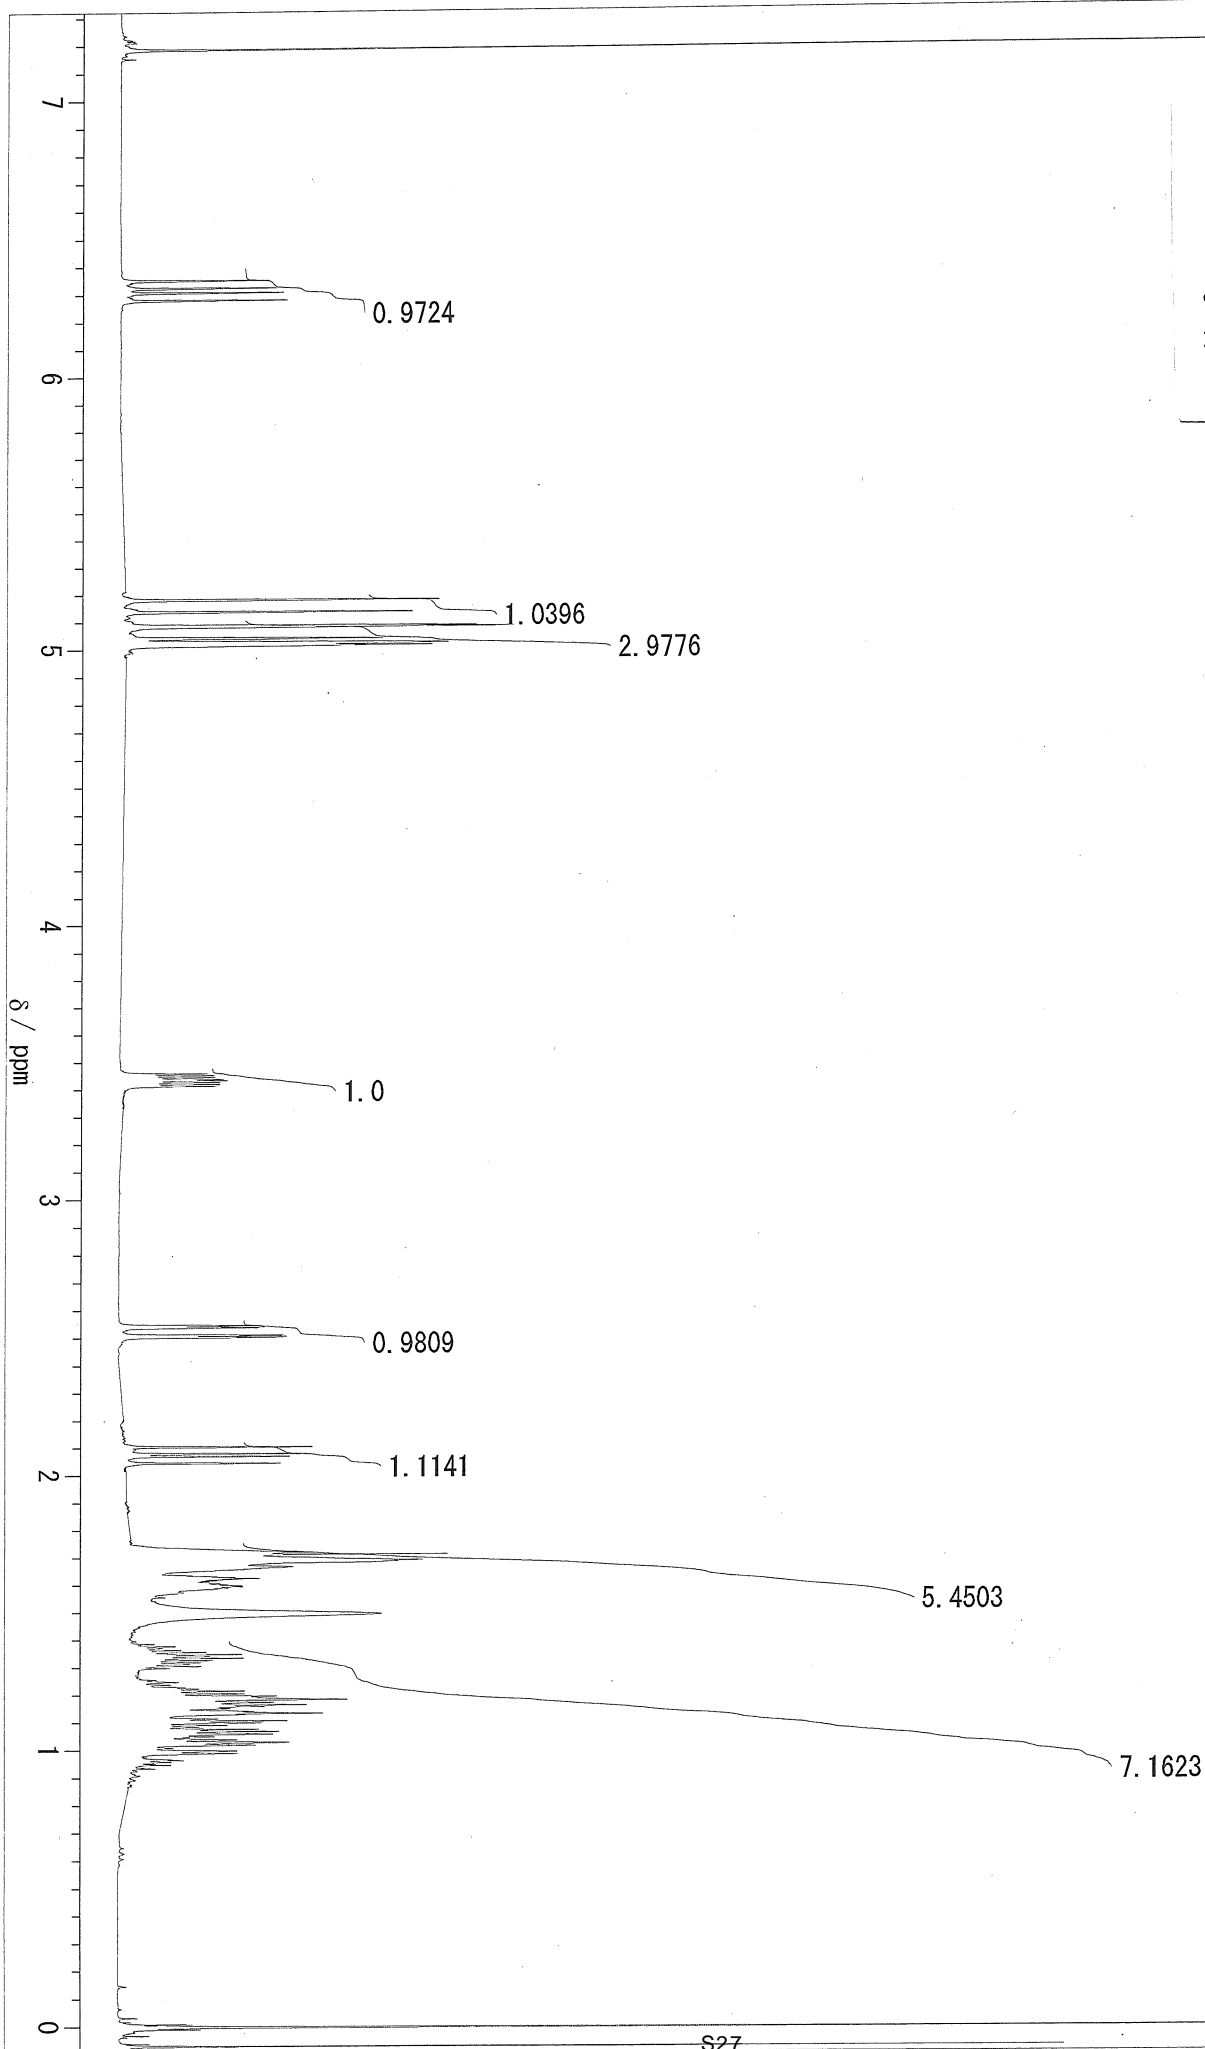

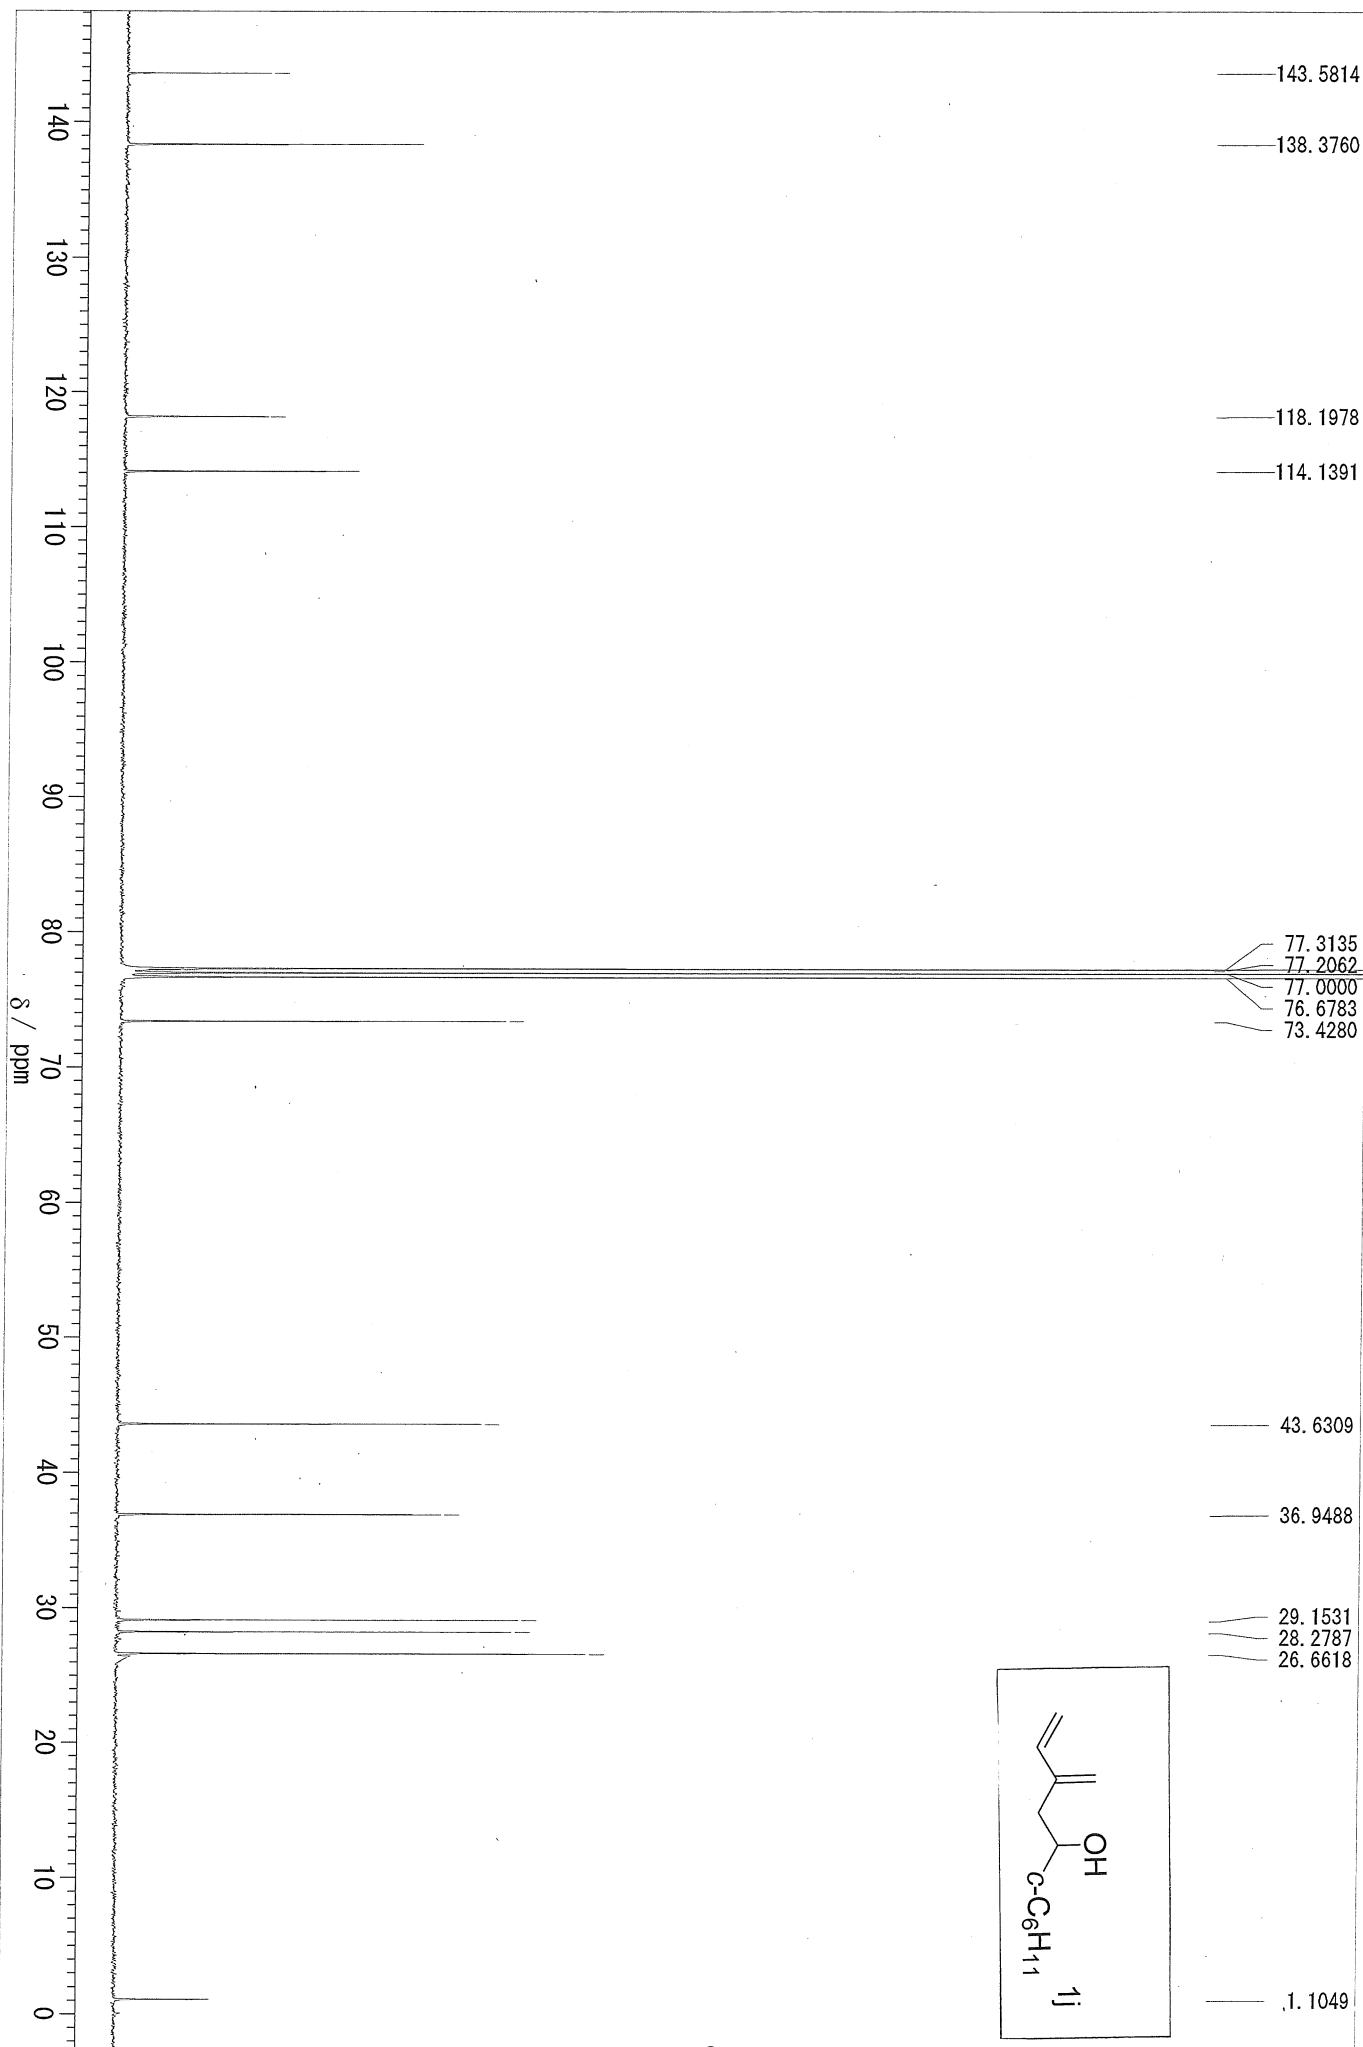

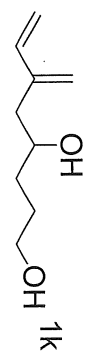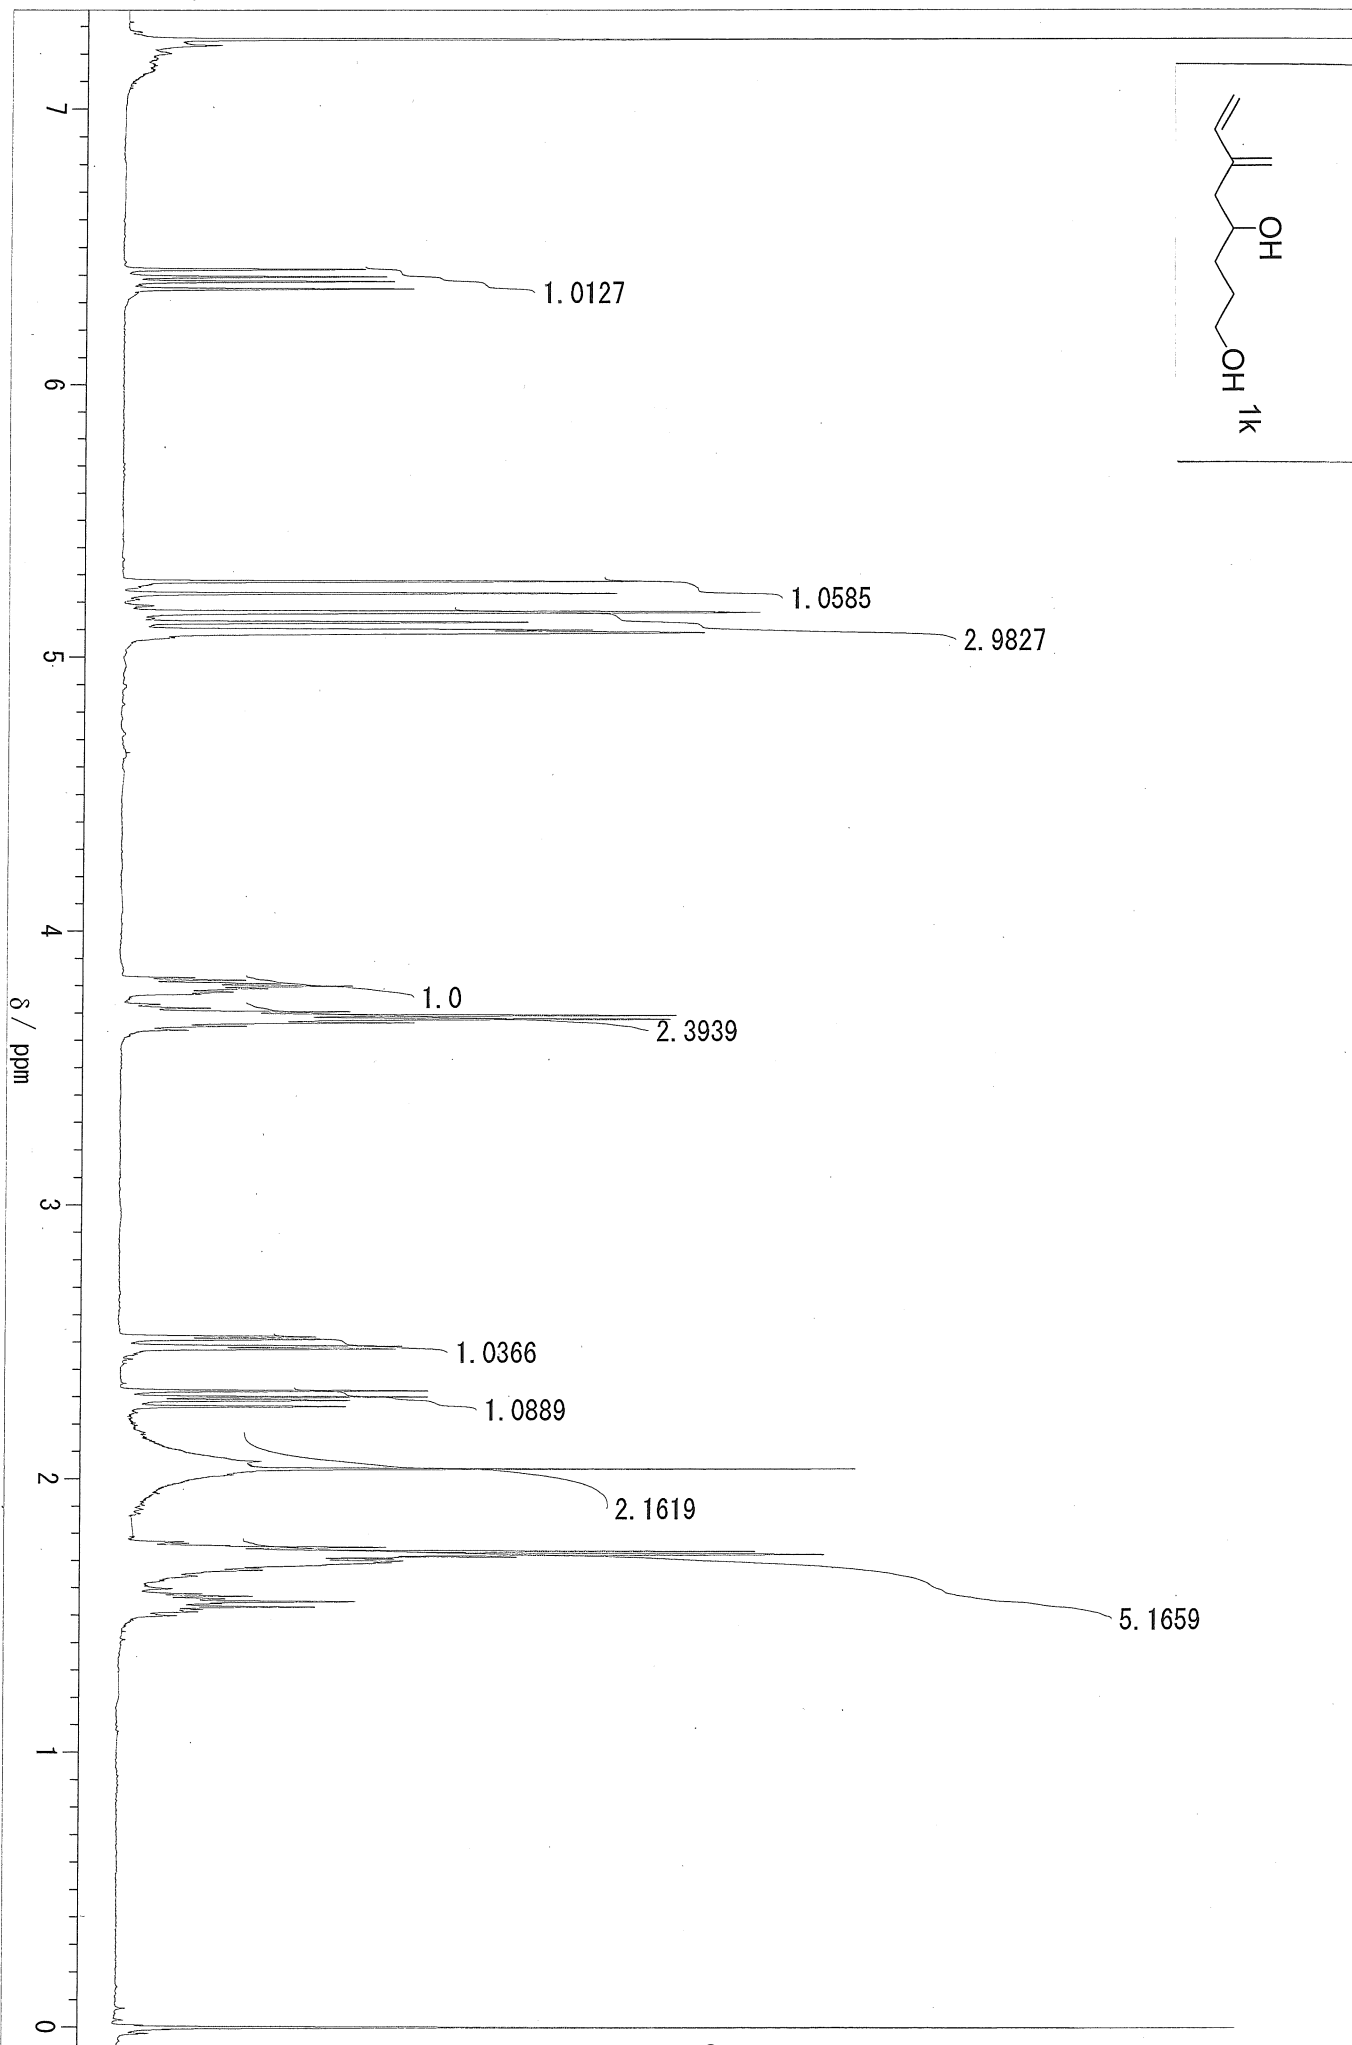

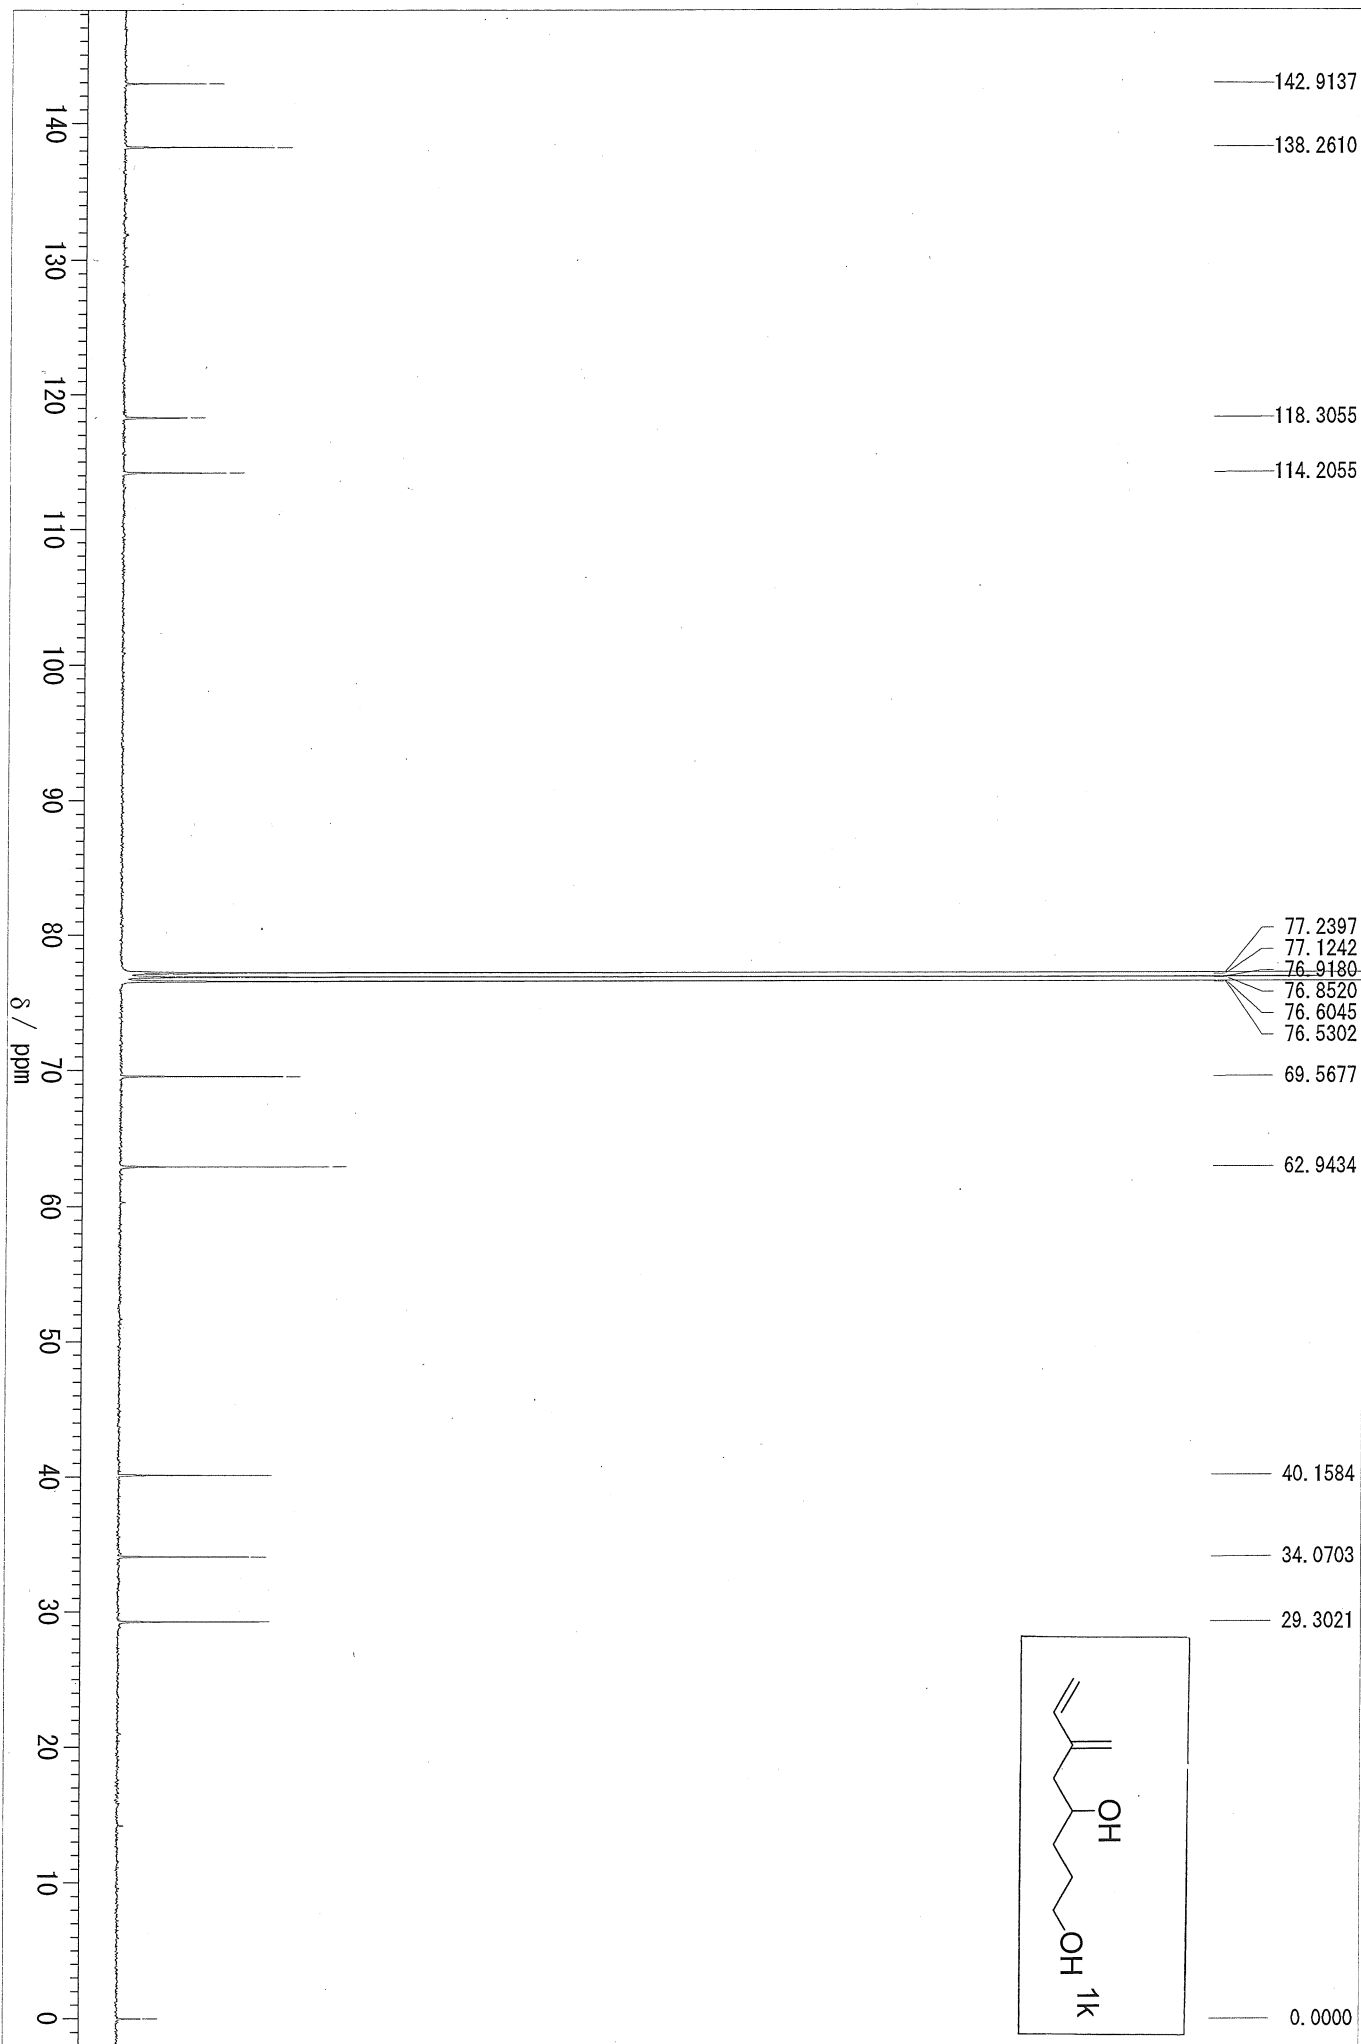

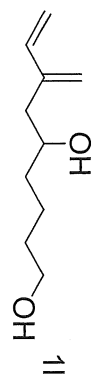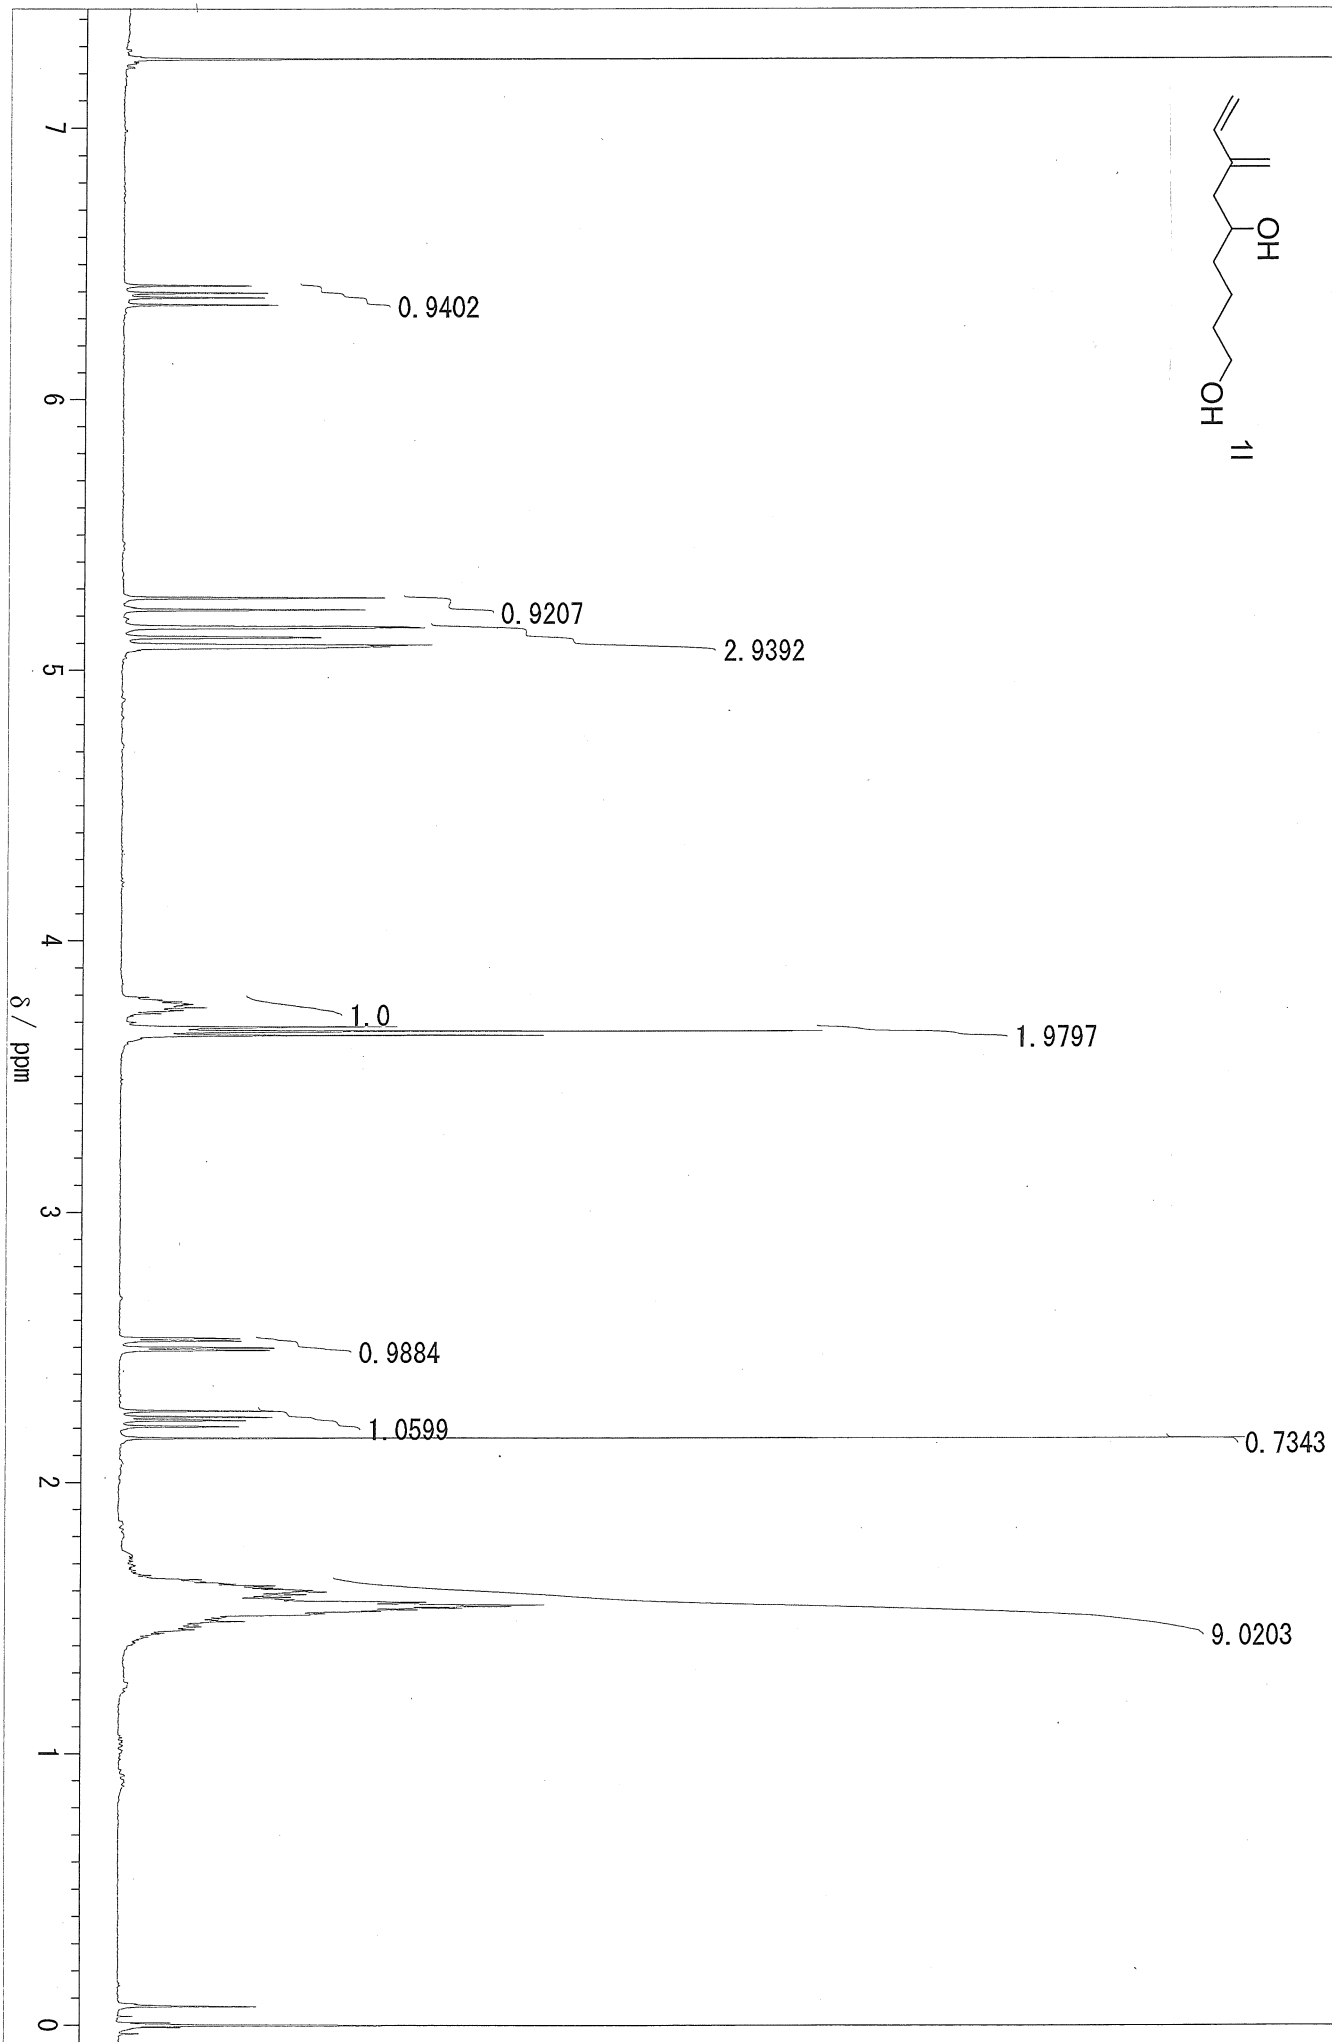

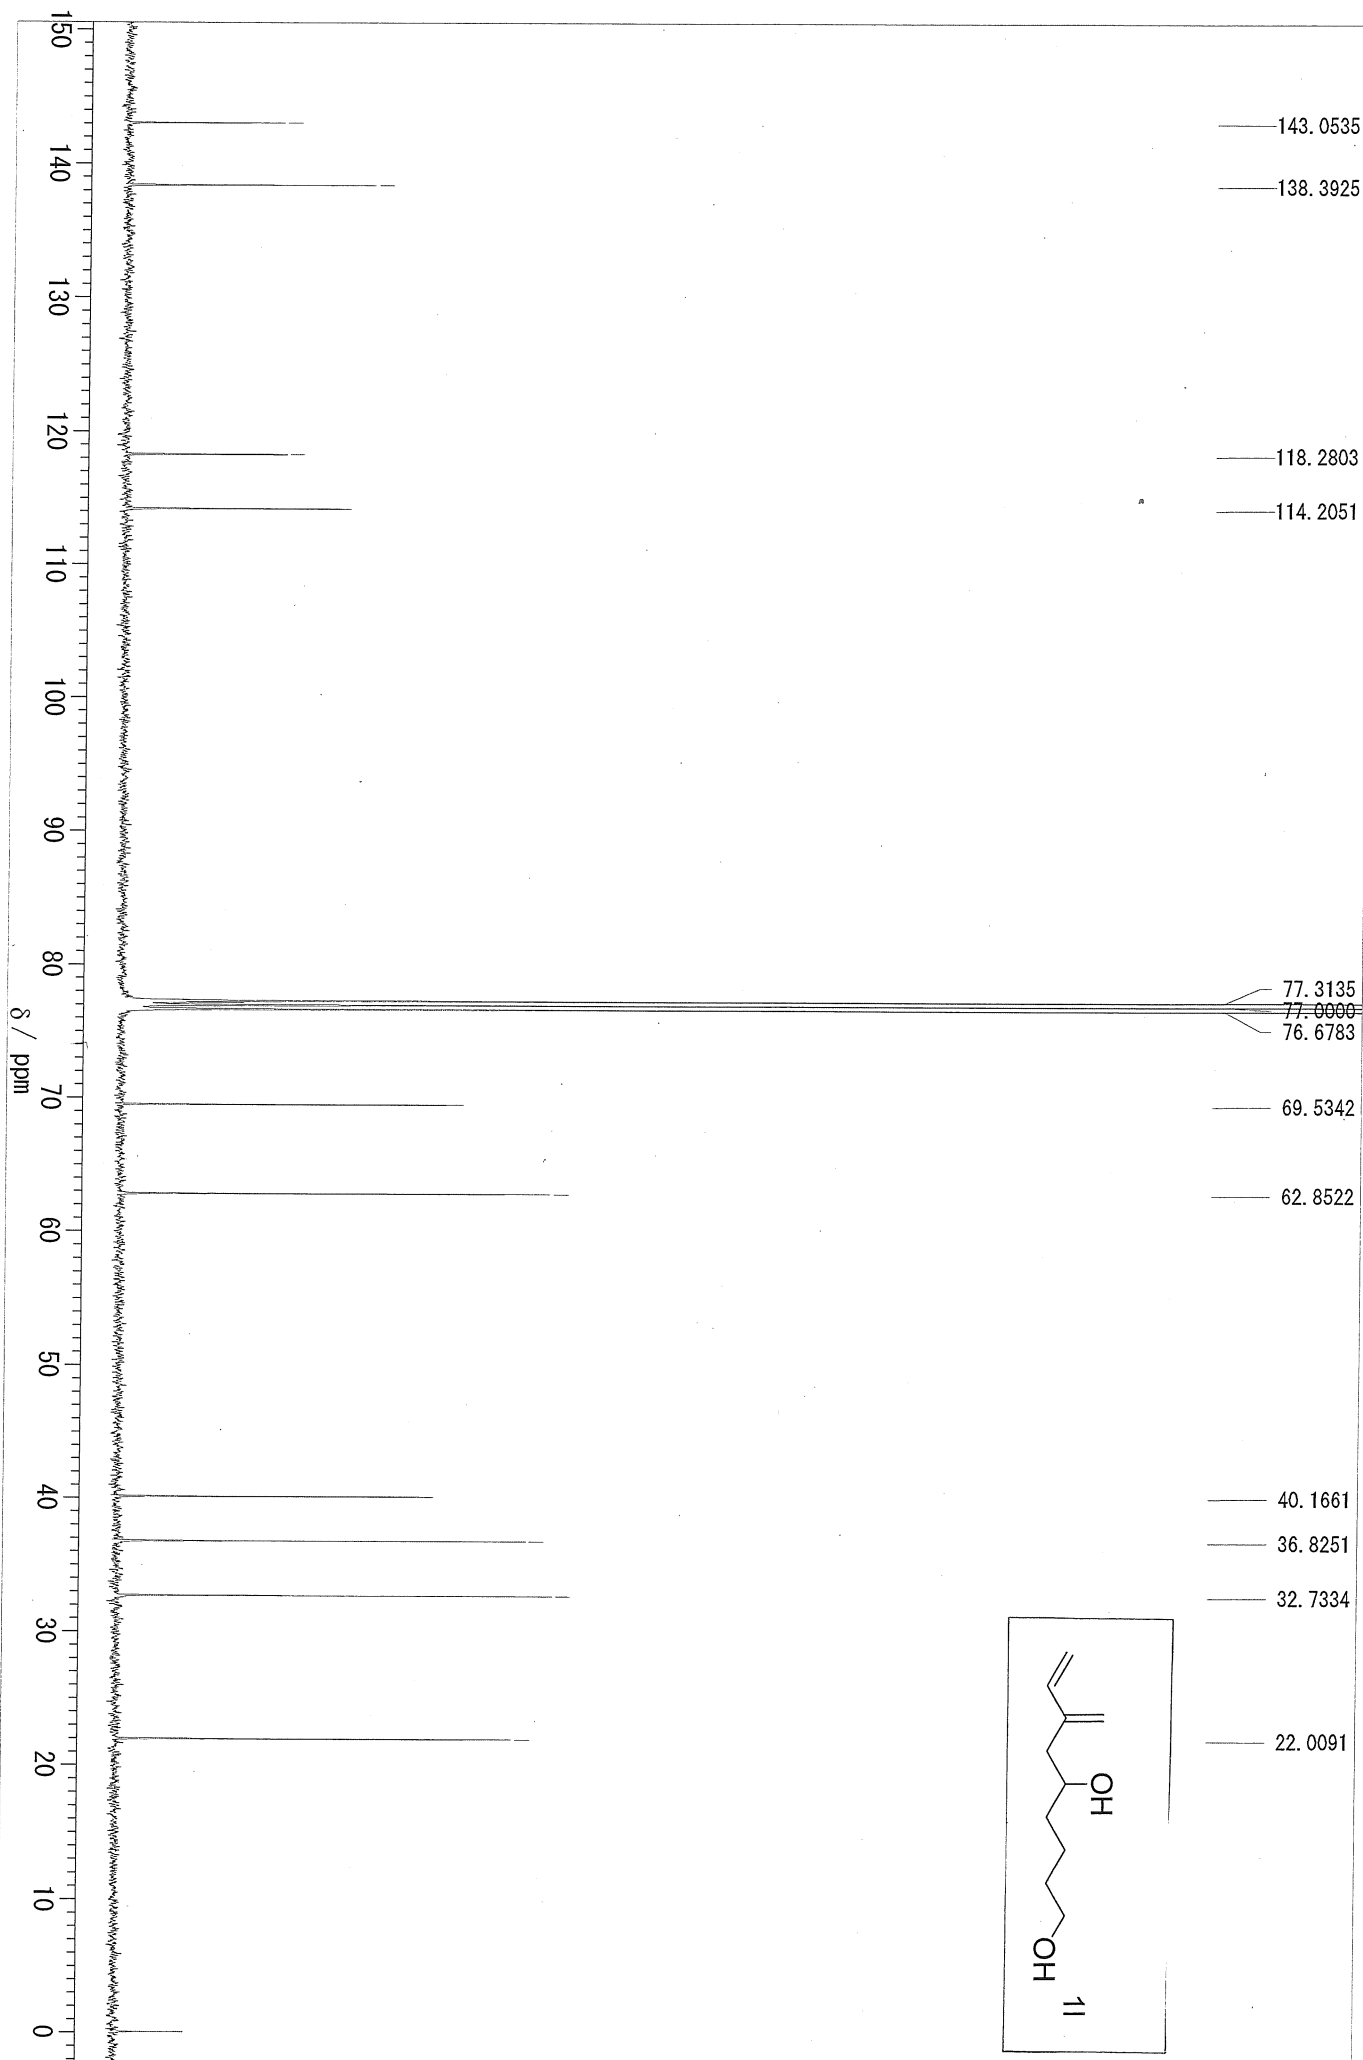

Supplement: Supplementary file 1 [file 4386196]
